# Supplementary material for: Determinants and outcomes of physical activity in patients with COPD: a systematic review
Source: HighWire-hosted journal article supplement (doi:10.1136/thoraxjnl-2013-204763), 2014-02-20
Supplement: thoraxjnl-2013-204763supp.pdf [file thoraxjnl-2013-204763supp.pdf]

## **Online only material (Online supplement)**

### **Determinants and outcomes of physical activity in patients with chronic obstructive pulmonary disease: a systematic review**

Elena Gimeno-Santos, Anja Frei, Claudia Steurer-Stey, Jordi de Batlle, Roberto A Rabinovich, Yogini Raste, Nicholas S Hopkinson, Michael I Polkey, Hans van Remoortel, Thierry Troosters, Karoly Kulich, Niklas Karlsson, Milo A Puhon and Judith Garcia-Aymerich on behalf of PROactive consortium

Online supplement 1. Protocol for systematic review.

Online supplement 2. Search strategy and results in 4 databases.

Online supplement 3. Form for guidance of title and abstract screening process.

Online supplement 4. Form for guidance of full text assessment process.

Online supplement 5. Details on methods of data extraction and quality assessment.

Online supplement Table 1. Reason for exclusion after full text assessment and data extraction process.

Online supplement Table 2. Design, patients' characteristics and instruments for measuring physical activity of 86 studies reporting associations between physical activity and its determinants or outcomes in COPD patients.

Online supplement Table 3a. Determinants covered by at least 2 articles and their association with physical activity, grouped in main categories and sorted by alphabetical order.

Online supplement Table 3b. Other potential determinants (only evidenced in 1 study) and their association with physical activity, grouped in main categories and sorted by alphabetical order.

Online supplement Table 4a. Outcomes covered by at least 2 articles and their association with physical activity, grouped in main categories and sorted by alphabetical order.

Online supplement Table 4b. Other potential outcomes (only evidence in 1 study) and their association with physical activity, grouped in main categories and sorted by alphabetical order.

Online supplement references.

**Online supplement 1. Protocol for systematic review.**

The next 10 pages contain the original protocol for the systematic review about “Determinants and outcomes of physical activity in COPD patients” that was approved by the PROactive consortium in October 6th, 2010.

**PROactive Work Package 2A: Input from the literature**

**Protocol for review 5 – Determinants and outcomes of PA for COPD patients**

October 6<sup>th</sup>, 2010

**WP2A team Systematic Review 5:**

- Milo Puhan, Anja Frei, Claudia Steurer-Stey, University of Zurich, Switzerland
- Judith Garcia Aymerich, Elena Gimeno, Jordi de Batlle Centre for Research in Environmental Epidemiology-CREAL, Barcelona, Spain
- Roberto Rabinovich, University of Edinburgh, Old College South Bridge, Scotland
- Nick Hopkinson, Michael Polkey, Yogini Raste, Matthew Hind, Royal Brompton Hospital, London
- Thierry Troosters, Hans van Remoortel, Katholieke University of Leuven, Belgium

## Background

The aim of Work Package 2 (WP2) of the PROactive project is to support the development of the initial version of the Patient-Reported Outcome (PRO) tool for physical activity in chronic obstructive pulmonary disease (COPD). The 4 sub-work-packages that contribute to the development are systematic reviews of the literature (WP2a), patient input (WP2b), input from experts (WP2c) and the validation and selection of an activity monitor (WP2d) that will be integrated as assessment of activity levels (performance) in addition to the PRO.

WP2a consists of five systematic reviews of the literature. In this report, we focus on the systematic review of studies that assessed determinants and outcomes of physical activity in COPD in order to develop a conceptual model (referred to as Systematic Review 5). A conceptual model describes the relationship among measurements, in this case the measurements of physical activity and of its determinants (e.g. hyperinflation or low FEV<sub>1</sub>) and its outcomes (e.g. hospital admissions or poor health-related quality of life). The conceptual model will inform the planning of the observational study of PROactive (WP4), which will in turn provide additional data for the conceptual model. Finally, the conceptual model will provide an evidence base for developing endpoint models for specific trials. An endpoint model describes the relationship among PRO and non-PRO measured in a specific trial and specifies the primary, secondary and exploratory outcomes.

The four other systematic reviews identify and assess available PRO tools for measuring physical activity (Systematic Review 1), qualitative studies about physical activity (Systematic Review 2), validation studies of activity monitors (Systematic Review 3) and studies proposing conceptual frameworks for physical activity for PRO developments (Systematic Review 4). For more detailed information about these reviews and the entire PROactive project, readers are referred to respective reports and the main protocol.

Thus the aim of the report of this systematic review is to describe the methodology for conducting systematic review 5, the search results, available conceptual models as well as to outline implications for PROactive.

## Methods

### Overview

We will follow standard systematic review methodology following handbooks of the Centre for Reviews and Dissemination (York, UK) and the Cochrane Collaboration. The figure shows the steps we will follow for each review and the protocol below provides details on each step:

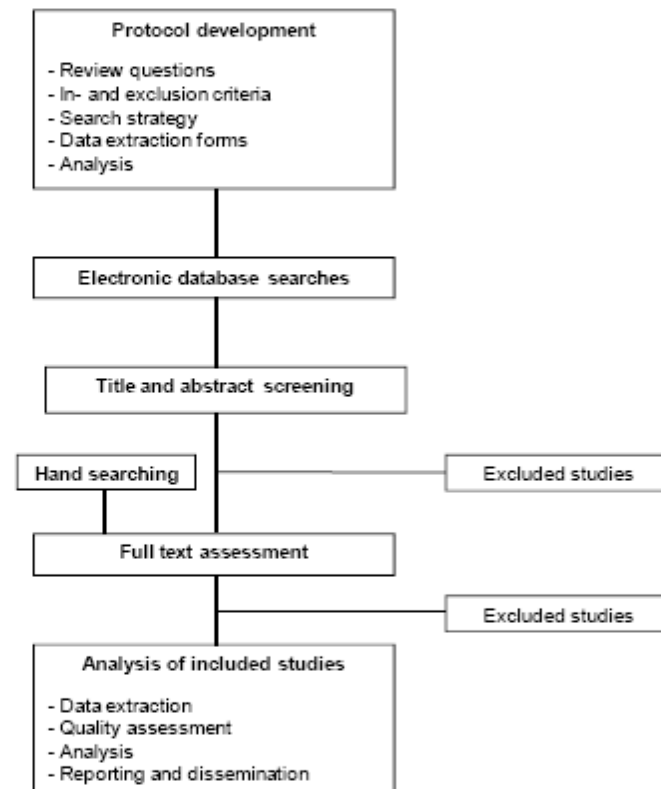

## Review questions

The objectives of the reviews are to:

**Review #5:** Identify and summarize studies assessing associations between physical activity and its determinants and outcomes in patients with COPD and to develop an initial conceptual model for physical activity in COPD.

## In- and exclusion criteria for studies

### Inclusion criteria for review 5 (conceptual model)

#### Population:

Patients with chronic obstructive pulmonary disease (COPD), defined by spirometry (any definition as long as it is based on spirometry such as the current one:  $FEV_1/FVC < 0.7$  and  $FEV_1$  in % predicted  $< 80\%$ ).

#### Content of article:

Articles that consider physical activity and any measurements that may be a determinant or outcome of low levels of physical activity in COPD.

Physical activity is defined as in its classic definition: "any bodily movement produced by skeletal muscles that results in energy expenditure"<sup>887</sup>. This definition will be broadly interpreted, thus in this review we will consider to include as physical activity:

- quantitative measures (activity monitors and questionnaires)
- activities of daily living (ADL) and instrumental-activities of daily living (I-ADL) (both are actually bodily movements that result in energy expenditure). We will consider any PROs that were included in systematic review 1 and thus follow the same criteria.

Physical activity will not contain measures of fitness/exercise capacity (e.g. 6-minute walk distance)

A determinant is defined as any factor that brings about change in a health condition or other defined characteristics. Examples of determinants in this review could be: age, lung hyperinflation, body mass index, co-morbidities (e.g. diabetes, depression). Determinants can be modifiable (e.g. dynamic hyperinflation, BMI) or non-modifiable (e.g. age).

An outcome is defined as all the possible results that may stem from exposure to a causal factor or from preventive or therapeutic interventions. Examples of outcomes in this review could be: lung function ( $FEV_1$ , IC), systemic inflammation (IL-6, CRP),

mortality, exacerbations, health care use, patient-reported outcomes (dyspnea, quality of life), exercise capacity (6-MWD, maximal workload), social participation etc.

**Study design:**

- Longitudinal observational studies: both prospective and retrospective studies.
- Experimental studies: both arms (interventional + control) if the outcome is "physical activity" (as defined above).
- Experimental studies: only control arm considered for an analysis similar to a longitudinal observational study.
- Cross-sectional studies: No restrictions, but quality will be considered in the analyses.
- Validation of PA instruments if they include associations with other variables.

**Exclusion criteria:**

- Language restrictions: none

**Searches**

**Electronic search for review 5**

**Databases:**

Search strategy for Medline, Embase, PsycINFO, CINAHL:

(COPD or 'chronic lung disease' or 'chronic obstructive lung disease' or 'chronic bronchitis' or emphysema) AND Human AND ('physical activity' or functioning or function or 'motor activity' or 'chronic limitation of activity' or 'limitation of activity' or 'activity limitation' or 'sedentary lifestyle' or 'physical exertion' or 'physical effort' or 'activities of daily living' or 'daily living activities' or 'daily living activity') AND (determinant or risk factor or predictor or outcome or 'outcome measure' or 'outcome assessment' or 'clinical outcome') AND ('longitudinal study' or 'randomized clinical trial' or 'randomized controlled trial' or 'controlled trial' or 'comparative study' or 'validation studies' or 'experimental study' or 'cross-sectional study' or 'prevalence study')

**Management of references**

The bibliographic details of all retrieved articles will be stored in a RefWorks-COS file RefWorks (<http://www.refworks.com/>) is an online research management, writing and collaboration tool that is designed to help researchers easily gather, manage, store and share all types of information, as well as generate citations and bibliographies. For a research consortium such as PROactive an online platform is most attractive

because it avoids sending around files that are constantly being updated. Using RefWorks we will have a common workspace that is always up-to-date. The University of Zurich will be offered a licensing agreement with ProQuest, the provider of RefWorks-COS. The agreement allows members of the PROactive consortium to login from any place. Licensing for all institutions of the PROactive consortium will not be required. This special agreement will be offered by ProQuest because they are interested in gaining experience with such research consortiums that are likely to become the standard in the future.

We will have 5 RefWorks-COS bibliographies for the five different reviews. We will remove duplicate records resulting from the various database searches. The source of identified articles (database, hand search, researcher contacts) will be recorded in a "user defined field" of the RefWorks-COS file. Additional "user defined field" will be assigned to individual reviewers where they can record their decision for in- and exclusion.

#### **Study selection**

Abstracts and titles screening: the title and abstract of every citation retrieved by the database searches will be scrutinized independently by 2 members of the consortium. We will order all articles that are deemed potentially eligible by at least one member of the consortium. Decisions of the reviewers will be recorded in the RefWorks-COS file (for example for Review/User 1, 0 = exclude; 1 = order for full text assessment; 2 = related study, do not order but may be useful reference).

Full text screening: two members of the consortium will then independently evaluate the retrieved full texts and make a decision on inclusion or exclusion according to the predefined selection criteria. They will record their decision about in- or exclusion in the RefWorks-COS file and will record the reason if the paper is decided to be excluded. In case of persistent disagreement a third member will decide upon in- an exclusion. Each reviewer's decisions as well as the final decisions on journal articles will be recorded in the RefWorks-COS file. All studies that do not fulfill all of the predefined criteria will be excluded and their bibliographic details listed with the specific reason for exclusion. Any disagreements will be resolved by consensus with close attention to the inclusion/exclusion criteria.

#### *Dealing with lack of information*

If unclear whether a study fulfils the inclusion criteria or not based on full text assessment we will make three attempts to contact authors by email or telephone giving one week to respond each time. If we fail to retrieve the relevant information we will list the respective study as "potentially relevant study".



#### *Dealing with duplication*

Multiple papers may be published for a number of reasons including translations, results at different follow-up period or reporting of different outcomes. We will treat a study with multiple reports as a single study but make reference all the publications.

#### *Reporting study selection*

We will use a flow chart to describe the study selection process according to the PRISMA STATEMENT (<http://www.prisma-statement.org/>) diagram.

*Pilot the study selection process:* Initially, members of the consortium will pilot the selection process by applying the inclusion and exclusion criteria to a sample of 10 randomly selected papers. Inclusion and exclusion criteria will be refined and clarified.

#### **Data extraction strategy**

The data extraction from study reports will be performed independently by 2 members of the consortium. A data collection electronic form adapted for this review will be used to recollect the data. The form will be tested by the reviewers to identify if it is confusing or incomplete. The data form could be modified after consensus between the reviewers.

The reviewers will extract the information from the report following the data extraction form criteria. The information must be explicit and detailed (using 'not reported' or 'unclear' if is necessary), the original information must write in quotes. In case of the reviews were unable to extract the whole information from the report they would contact with study authors.

The reviewers will share the information at the end of the data extraction process. Any disagreements will be resolved by consensus with close attention to the data extraction form. In case of persistent disagreement, a third member of the consortium will resolve it.

#### **Quality assessment**

##### **Methods of analysis and synthesis**

The different designs will provide different information, from the cross-sectional studies we will learn the strength of association, from the longitudinal studies we will learn about the direction of the association. Therefore, we should conduct a meta-analysis based on the information of the longitudinal studies where PA is the outcome. We should conduct a meta-analysis based on the information of the cross-sectional

studies. And should conduct a meta-analysis based on the information of the longitudinal studies where PA is the exposure.

#### **Organization of review 5**

**Lead:** Milo Puhan and Judith Garcia-Aymerich

**Protocol development:** Milo Puhan, Anja Frei, Claudia Steurer-Stey, Judith Garcia Aymerich, Elena Gimeno, Roberto Rabinovich, Nick Hopkinson, Michael Polkey, Thierry Troosters, Hans van Remoortel, Niklas Karlsson

**Review coordination:** Elena Gimeno and Anja Frei

**Database searches:** Anja Frei

**Reviewers:** Elena Gimeno, Anja Frei, Milo Puhan, Claudia Steurer-Stey, Judith Garcia Aymerich, Roberto Rabinovich, Nick Hopkinson, Michael Polkey, Thierry Troosters, Hans van Remoortel, Jordi de Batlle

#### **Tentative timelines**

Initial protocol: March 5<sup>th</sup> 2010

Revision of protocol: May 7<sup>th</sup> 2010

Review of protocol by team: May 28<sup>th</sup> 2010

Finalize protocol: first week of June 2010

Database search: first week of June 2010

Title and abstract screening: depends on number of refs, tbd

Full text assessment: tbd

Data extraction: tbd

Report writing: tbd

## Appendices

### Systematic Review 5

#### Selection criteria for title and abstract screening

##### Inclusion Criteria

###### Population:

- Patients with chronic obstructive pulmonary disease (COPD)
- Other populations including COPD patients:
  - if they report results separately for each disease → order full text (1)
  - if they don't report the results separately and COPD population is ≥90% → order full text (1)
  - if they don't report the results separately and COPD population is <90% → exclude (0)
  - if the abstract doesn't explicit the previous points → order full text (1)

###### Type of article:

###### Articles that consider:

- measures of physical activity (PA) (any activity monitors and questionnaires *-see below list of questionnaires which we should consider*);
- and any other variable that is associated/correlated with PA, as potential determinant/outcome (e.g. age, BMI, co-morbidities, FEV<sub>1</sub>, systemic inflammation, exacerbations, health care use, dyspnea, quality of life, exercise capacity, social participation, etc).

Note: we won't consider PA as measures of fitness/exercise capacity (e.g. 6MWT)

###### Study design:

- Longitudinal observational studies: prospective and retrospective studies.
- Experimental studies if have "physical activity" as an outcome.
- Cross-sectional studies.
- Validation of PA instruments if they include associations with other variables.

##### Exclusion criteria

Language restrictions: none

If the Abstract is not clear enough on the eligibility criteria or does not contain the necessary information → please be conservative and order full text (1)

Use your user filed to classify title & abstract screening in RefWorks file:

- 0 = exclude
- 1 = order for full text
- 2 = related study that may be useful reference

List of questionnaires to be consider in this review:

- The Activities Checklist, Arbuckle, 1994
- Zutphen Physical Activity Questionnaire, Caspersen, 1991
- The Adelaide Activities Profile (AAP), Clark, 1995
- The Customary Activity Questionnaire, Dallosso, 1988
- The YALE Physical Activity Survey for Older Adults (YPAS), Dipietro, 1993
- Meaningful Activity Participation Assessment (MAPA), Eakman, 2007
- The Lifetime Total Physical Activity Questionnaire, Friedenreich, 1998
- The Physical Activity Questionnaire, Liu, 2001
- The Veterans Specific Activity Questionnaire (VSAQ), Myers, 1994
- The Physical Activity and Disability Survey (PADS), Rimmer, 2001
- The LSA Physical Activity Questionnaire (LAPAQ), Stel, 2003
- CHAMPS Physical Activity Questionnaire, Stewart, 2001
- Physical activity questionnaire, Voorrips, 1991
- The Physical Activity Scale for the Elderly (PASE), Washburn, 1993
- Scale of Older Adults' Routine (SOAR), Zisberg, 2005

## **Online supplement 2. Search strategy and results in 4 databases.**

We performed searches in the databases Medline, Embase, CINAHL and Psycinfo using the following search terms: chronic obstructive lung disease, chronic bronchitis, emphysema, physical activity, motor activity, activity of daily living, physical inactivity, risk factors, outcome assessment, randomized controlled trial, experimental studies, cohort studies, cross-sectional studies, longitudinal studies. All publications prior to November 2012 (the time of the most recent search) were included. Additionally, we also performed manual searches of (i) all references listed in retrieved full-text articles and (ii) the first 50 references (sorted by link ranking) from PubMed's "Related Articles" search filter of retrieved full-text articles. We also contacted external scientists on this topic to identify further articles.

The bibliographic details of all retrieved articles were stored in a RefWorks-COS file. We removed duplicate records resulting from the various database searches. The source of identified articles (database, hand search, and researcher contacts) was recorded in a "user defined field" of the RefWorks-COS file. An additional "user defined field" was assigned to individual reviewers where they recorded their decision for in- and exclusion.

Ovid MEDLINE(R), Ovid MEDLINE(R) In-Process & Other Non-Indexed Citations, Ovid MEDLINE(R) Daily and Ovid OLDMEDLINE(R) 1946 to Present

| #  | Suchen                                                                                                                                                                                                                                                                                | Ergebnisse |
|----|---------------------------------------------------------------------------------------------------------------------------------------------------------------------------------------------------------------------------------------------------------------------------------------|------------|
| 1  | Lung Diseases/                                                                                                                                                                                                                                                                        | 52324      |
| 2  | chronic.tw.                                                                                                                                                                                                                                                                           | 630259     |
| 3  | 1 and 2                                                                                                                                                                                                                                                                               | 6161       |
| 4  | lung diseases, obstructive/ or pulmonary disease, chronic obstructive/ or bronchitis, chronic/                                                                                                                                                                                        | 31477      |
| 5  | (COPD or 'chronic lung disease' or 'chronic obstructive lung disease' or 'chronic bronchitis').tw.                                                                                                                                                                                    | 29350      |
| 6  | exp Pulmonary Emphysema/                                                                                                                                                                                                                                                              | 12869      |
| 7  | emphysema.tw.                                                                                                                                                                                                                                                                         | 15442      |
| 8  | emphysema/ or mediastinal emphysema/ or subcutaneous emphysema/                                                                                                                                                                                                                       | 6986       |
| 9  | 7 not 8                                                                                                                                                                                                                                                                               | 12113      |
| 10 | 3 or 4 or 5 or 6 or 9                                                                                                                                                                                                                                                                 | 63861      |
| 11 | exp Motor Activity/                                                                                                                                                                                                                                                                   | 88894      |
| 12 | exp "Activities of Daily Living"/                                                                                                                                                                                                                                                     | 40409      |
| 13 | exp Exercise/                                                                                                                                                                                                                                                                         | 51689      |
| 14 | exp Walking/                                                                                                                                                                                                                                                                          | 12461      |
| 15 | ("physical activit*" or "Motor activit*" or "activit* of daily living" or "Chronic Limitation of Activit*" or "Limitation of Activit*" or "Daily Living Activit*" or "motor inactivit*" or "physical inactivit*" or "functional activit*" or walking or "functional performance").tw. | 100599     |
| 16 | or/11-15                                                                                                                                                                                                                                                                              | 235838     |
| 17 | 10 and 16                                                                                                                                                                                                                                                                             | 2330       |
| 18 | Risk factors of readmission to hospital for a COPD exacerbation: a prospective study.ti.                                                                                                                                                                                              | 1          |
| 19 | Characteristics of Physical Activities in Daily Life in Chronic Obstructive Pulmonary Disease.ti.                                                                                                                                                                                     | 1          |
| 20 | 17 and 18                                                                                                                                                                                                                                                                             | 1          |
| 21 | 17 and 19                                                                                                                                                                                                                                                                             | 1          |
| 22 | "outcome assessment (health care)"/ or treatment outcome/                                                                                                                                                                                                                             | 460397     |
| 23 | risk factors/                                                                                                                                                                                                                                                                         | 418203     |

4

18.06.2010 10:52

Suchergebnisse

<http://ovidsp.tx.ovid.com/sp-2.3.1b/ovidweb.cgi>

|    |                                                                                                                                                                                                              |         |
|----|--------------------------------------------------------------------------------------------------------------------------------------------------------------------------------------------------------------|---------|
| 24 | (outcome adj3 (measur* or assess*).tw.                                                                                                                                                                       | 116810  |
| 25 | ("risk factor*" or predictor).mp. or "clinical outcome".tw. [mp=title, original title, abstract, name of substance word, subject heading word, unique identifier]                                            | 614457  |
| 26 | ((quantif* or measur* or assess*) adj3 (activit* or performance or function)).tw.                                                                                                                            | 138787  |
| 27 | or/22-26                                                                                                                                                                                                     | 1222316 |
| 28 | 18 and 27                                                                                                                                                                                                    | 1       |
| 29 | 19 and 27                                                                                                                                                                                                    | 1       |
| 30 | 17 and 27                                                                                                                                                                                                    | 762     |
| 31 | cohort studies/ or longitudinal studies/ or follow-up studies/ or prospective studies/ or cross-sectional studies/                                                                                           | 861267  |
| 32 | clinical trials as topic/ or controlled clinical trials as topic/ or randomized controlled trials as topic/                                                                                                  | 217736  |
| 33 | ("longitudinal study" or "randomized clinical trial" or "randomized controlled trial" or "controlled trial" or "comparative study" or "cohort study" or "experimental study" or "cross-sectional study").tw. | 233352  |
| 34 | Comparative Study/                                                                                                                                                                                           | 1488243 |
| 35 | 31 or 32 or 33                                                                                                                                                                                               | 1188991 |
| 36 | 30 and 35                                                                                                                                                                                                    | 291     |
| 37 | limit 36 to humans                                                                                                                                                                                           | 290     |
| 38 | ((quantif* or measur* or assess* or investigat* or examin* or evaluat*) adj10 (activit* or performance or function)).tw.                                                                                     | 521428  |
| 39 | 22 or 23 or 24 or 25 or 38                                                                                                                                                                                   | 1574543 |
| 40 | 17 and 39                                                                                                                                                                                                    | 998     |
| 41 | ("19255291" or "18708291" or "16738033" or "12740256" or "18573647" or "17268729" or "16537849" or "9554623").af.                                                                                            | 8       |
| 42 | 40 and 41                                                                                                                                                                                                    | 8       |
| 43 | from 40 keep 1-499                                                                                                                                                                                           | 499     |
| 44 | from 40 keep 500-998                                                                                                                                                                                         | 499     |
| 45 | from 44 keep 1                                                                                                                                                                                               | 1       |

Suchergebnisse: from 44 [from 41 keep 500-998] keep 1

Verfügbare Ergebnisse: 1

Angezeigte Ergebnisse: #1

```
<1>
VN - Ovid Technologies
DB -
UI - 15620116
RD - From MEDLINE, a database of the U.S. National Library of Medicine.
ST - MEDLINE
AU - Chou SH
```

| ID | Search                                                                                                                                                                                                                                                                                                                                                                                                                                                                                                                                                                                                                                                                                                                      | Results | Date of search |
|----|-----------------------------------------------------------------------------------------------------------------------------------------------------------------------------------------------------------------------------------------------------------------------------------------------------------------------------------------------------------------------------------------------------------------------------------------------------------------------------------------------------------------------------------------------------------------------------------------------------------------------------------------------------------------------------------------------------------------------------|---------|----------------|
| 7  | #3 AND #6                                                                                                                                                                                                                                                                                                                                                                                                                                                                                                                                                                                                                                                                                                                   | 1314    | 21 Jun 2010    |
| 6  | #4 OR #5                                                                                                                                                                                                                                                                                                                                                                                                                                                                                                                                                                                                                                                                                                                    | 1095605 | 21 Jun 2010    |
| 5  | ((quantif* OR measur* OR assess* OR investigat* OR examin* OR evaluat*) NEAR/10 (activit* OR performance OR function)):ab,ti                                                                                                                                                                                                                                                                                                                                                                                                                                                                                                                                                                                                | 591744  | 21 Jun 2010    |
| 4  | ((quantif* OR measur* OR assess*) NEAR/3 (activit* OR performance OR function)):ab,ti OR ((abilit* OR disabilit*) NEXT/3 (measur* OR assess*)):ab,ti OR (outcome NEAR/3 measurement):ab,ti OR (outcome NEAR/3 assessment):ab,ti OR 'risk factors'/exp OR predictor OR 'clinical outcome':ab,ti OR 'behavioral risk factor surveillance system'/exp OR 'risk factor'/exp                                                                                                                                                                                                                                                                                                                                                     | 672506  | 21 Jun 2010    |
| 3  | #1 AND #2                                                                                                                                                                                                                                                                                                                                                                                                                                                                                                                                                                                                                                                                                                                   | 5501    | 21 Jun 2010    |
| 2  | 'motor activity'/exp OR 'exercise physiology'/exp OR 'physical activity':ab,ti OR 'physical activities':ab,ti OR 'motor activity':ab,ti OR 'motor activities':ab,ti OR 'activity of daily living':ab,ti OR 'activities of daily living':ab,ti OR 'chronic limitation of activity':ab,ti OR 'limitation of activity':ab,ti OR 'limitation of activities':ab,ti OR 'daily living activity':ab,ti OR 'daily living activities':ab,ti OR 'motor inactivity':ab,ti OR 'motor inactivities':ab,ti OR 'physical inactivity':ab,ti OR 'physical inactivities':ab,ti OR 'functional activity':ab,ti OR 'functional activities':ab,ti OR 'functional performance':ab,ti OR walking:ab,ti OR exercise:ab,ti OR 'physical activity'/exp | 566815  | 21 Jun 2010    |
| 1  | 'chronic lung disease' OR 'chronic lung emphysema'/exp OR 'chronic lung emphysema' OR 'chronic obstructive lung disorder'/exp OR 'chronic obstructive lung disorder' OR 'copd'/exp OR 'chronic lung disease'/exp OR 'chronic obstructive lung disease'/exp OR 'chronic bronchitis':ab,ti OR 'chronic pulmonary disease'/exp OR 'chronic obstructive pulmonary disease'/exp                                                                                                                                                                                                                                                                                                                                                  | 78004   | 21 Jun 2010    |

|     |                                                                                                                                                                                                                                                                                                                                                                                                                                                                                                                                                                              |                                                |                                                                                                    |        |
|-----|------------------------------------------------------------------------------------------------------------------------------------------------------------------------------------------------------------------------------------------------------------------------------------------------------------------------------------------------------------------------------------------------------------------------------------------------------------------------------------------------------------------------------------------------------------------------------|------------------------------------------------|----------------------------------------------------------------------------------------------------|--------|
| S13 | S11 and S12                                                                                                                                                                                                                                                                                                                                                                                                                                                                                                                                                                  | <b>Search modes</b> - Find all my search terms | <b>Interface</b> - EBSCOhost<br><b>Search Screen</b> - Advanced Search<br><b>Database</b> - CINAHL | 6833   |
| S12 | chronic                                                                                                                                                                                                                                                                                                                                                                                                                                                                                                                                                                      | <b>Search modes</b> - Find all my search terms | <b>Interface</b> - EBSCOhost<br><b>Search Screen</b> - Advanced Search<br><b>Database</b> - CINAHL | 77379  |
| S11 | (MH "Lung Diseases, Obstructive+")                                                                                                                                                                                                                                                                                                                                                                                                                                                                                                                                           | <b>Search modes</b> - Find all my search terms | <b>Interface</b> - EBSCOhost<br><b>Search Screen</b> - Advanced Search<br><b>Database</b> - CINAHL | 22023  |
| S10 | (MH "Outcomes (Health Care)+")                                                                                                                                                                                                                                                                                                                                                                                                                                                                                                                                               | <b>Search modes</b> - Find all my search terms | <b>Interface</b> - EBSCOhost<br><b>Search Screen</b> - Advanced Search<br><b>Database</b> - CINAHL | 110184 |
| S9  | (MH "Risk Factors+")                                                                                                                                                                                                                                                                                                                                                                                                                                                                                                                                                         | <b>Search modes</b> - Find all my search terms | <b>Interface</b> - EBSCOhost<br><b>Search Screen</b> - Advanced Search<br><b>Database</b> - CINAHL | 50384  |
| S8  | (MH "Outcome Assessment")                                                                                                                                                                                                                                                                                                                                                                                                                                                                                                                                                    | <b>Search modes</b> - Find all my search terms | <b>Interface</b> - EBSCOhost<br><b>Search Screen</b> - Advanced Search<br><b>Database</b> - CINAHL | 9735   |
| S7  | (MH "Treatment Outcomes+")                                                                                                                                                                                                                                                                                                                                                                                                                                                                                                                                                   | <b>Search modes</b> - Find all my search terms | <b>Interface</b> - EBSCOhost<br><b>Search Screen</b> - Advanced Search<br><b>Database</b> - CINAHL | 77529  |
| S6  | (MH "Motor Activity+")                                                                                                                                                                                                                                                                                                                                                                                                                                                                                                                                                       | <b>Search modes</b> - Find all my search terms | <b>Interface</b> - EBSCOhost<br><b>Search Screen</b> - Advanced Search<br><b>Database</b> - CINAHL | 2164   |
| S5  | (MH "Exercise+")                                                                                                                                                                                                                                                                                                                                                                                                                                                                                                                                                             | <b>Search modes</b> - Find all my search terms | <b>Interface</b> - EBSCOhost<br><b>Search Screen</b> - Advanced Search<br><b>Database</b> - CINAHL | 36565  |
| S4  | (MH "Walking+")                                                                                                                                                                                                                                                                                                                                                                                                                                                                                                                                                              | <b>Search modes</b> - Find all my search terms | <b>Interface</b> - EBSCOhost<br><b>Search Screen</b> - Advanced Search<br><b>Database</b> - CINAHL | 8650   |
| S3  | (MH "Activities of Daily Living") or (MH "Physical Activity")                                                                                                                                                                                                                                                                                                                                                                                                                                                                                                                | <b>Search modes</b> - Find all my search terms | <b>Interface</b> - EBSCOhost<br><b>Search Screen</b> - Advanced Search<br><b>Database</b> - CINAHL | 22081  |
| S2  | (MH "Emphysema+")                                                                                                                                                                                                                                                                                                                                                                                                                                                                                                                                                            | <b>Search modes</b> - Find all my search terms | <b>Interface</b> - EBSCOhost<br><b>Search Screen</b> - Advanced Search<br><b>Database</b> - CINAHL | 939    |
| S1  | (MH "Pulmonary Disease, Chronic Obstructive+")                                                                                                                                                                                                                                                                                                                                                                                                                                                                                                                               | <b>Search modes</b> - Find all my search terms | <b>Interface</b> - EBSCOhost<br><b>Search Screen</b> - Advanced Search<br><b>Database</b> - CINAHL | 4162   |
|     |                                                                                                                                                                                                                                                                                                                                                                                                                                                                                                                                                                              |                                                | <b>Search Screen</b> - Advanced Search<br><b>Database</b> - CINAHL                                 |        |
| S16 | S1 or S2 or S13 or S14                                                                                                                                                                                                                                                                                                                                                                                                                                                                                                                                                       | <b>Search modes</b> - Find all my search terms | <b>Interface</b> - EBSCOhost<br><b>Search Screen</b> - Advanced Search<br><b>Database</b> - CINAHL | 9238   |
| S15 | TI ( ("physical activit"" or 'Motor activit" or 'activit" of daily living' or 'Chronic Limitation of Activit" or 'Limitation of Activit" or 'Daily Living Activit" or "motor inactivit"" or 'physical inactivit" or "functional activit"" or walking or "functional performance") ) or AB ( ("physical activit"" or 'Motor activit" or 'activit" of daily living' or 'Chronic Limitation of Activit" or 'Limitation of Activit" or 'Daily Living Activit" or "motor inactivit"" or 'physical inactivit" or "functional activit"" or walking or "functional performance") ) ) | <b>Search modes</b> - Find all my search terms | <b>Interface</b> - EBSCOhost<br><b>Search Screen</b> - Advanced Search<br><b>Database</b> - CINAHL | 27578  |
| S14 | TI ( (COPD or 'chronic lung disease' or 'chronic obstructive lung disease' or 'chronic bronchitis') ) or AB ( (COPD or 'chronic lung disease' or 'chronic obstructive lung disease' or 'chronic bronchitis') ) )                                                                                                                                                                                                                                                                                                                                                             | <b>Search modes</b> - Find all my search terms | <b>Interface</b> - EBSCOhost<br><b>Search Screen</b> - Advanced Search<br><b>Database</b> - CINAHL | 5761   |



| #  | Suchen                                                                                                                                                                                                                                                                                | Ergebnisse |
|----|---------------------------------------------------------------------------------------------------------------------------------------------------------------------------------------------------------------------------------------------------------------------------------------|------------|
| 1  | (COPD or 'chronic lung disease' or 'chronic obstructive lung disease' or 'chronic bronchitis').tw.                                                                                                                                                                                    | 737        |
| 2  | lung disorders/ or exp chronic obstructive pulmonary disease/ or exp pulmonary emphysema/                                                                                                                                                                                             | 1251       |
| 3  | lung emphysema.mp. or pulmonary emphysema.tw. [mp=title, abstract, heading word, table of contents, key concepts]                                                                                                                                                                     | 9          |
| 4  | 1 or 2 or 3                                                                                                                                                                                                                                                                           | 1494       |
| 5  | "chronic obstructive pulmonary disease".mp. or "chronic pulmonary disease".tw. [mp=title, abstract, heading word, table of contents, key concepts]                                                                                                                                    | 873        |
| 6  | 4 or 5                                                                                                                                                                                                                                                                                | 1722       |
| 7  | ("physical activit*" or 'Motor activit*' or 'activit* of daily living' or 'Chronic Limitation of Activit*' or 'Limitation of Activit*' or 'Daily Living Activit*' or "motor inactivit*" or 'physical inactivit*' or "functional activit*" or walking or "functional performance").tw. | 27087      |
| 8  | exp "activities of daily living"/                                                                                                                                                                                                                                                     | 3061       |
| 9  | exp Physical Activity/                                                                                                                                                                                                                                                                | 14400      |
| 10 | exp exercise/                                                                                                                                                                                                                                                                         | 11680      |
| 11 | exp walking/                                                                                                                                                                                                                                                                          | 2001       |
| 12 | exp Motor Performance/                                                                                                                                                                                                                                                                | 10971      |
| 13 | or/7-12                                                                                                                                                                                                                                                                               | 44545      |
| 14 | 6 and 13                                                                                                                                                                                                                                                                              | 151        |
| 15 | exp treatment outcomes/                                                                                                                                                                                                                                                               | 22382      |
| 16 | exp risk factors/                                                                                                                                                                                                                                                                     | 23364      |
| 17 | (outcome adj3 (measur* or assess*)).tw.                                                                                                                                                                                                                                               | 19987      |
| 18 | ("risk factor*" or predictor).mp. or "clinical outcome".tw. [mp=title, abstract, heading word, table of contents, key concepts]                                                                                                                                                       | 73869      |
| 19 | ((quantif* or measur* or assess*) adj3 (activit* or performance or function)).tw.                                                                                                                                                                                                     | 30715      |
| 20 | or/15-19                                                                                                                                                                                                                                                                              | 138245     |
| 21 | 14 and 20                                                                                                                                                                                                                                                                             | 42         |
| 22 | limit 21 to human                                                                                                                                                                                                                                                                     | 42         |
| 23 | ((quantif* or measur* or assess* or investigat* or examin* or evaluat*) adj10 (activit* or performance or function)).tw.                                                                                                                                                              | 111820     |
| 24 | 15 or 16 or 17 or 18 or 23                                                                                                                                                                                                                                                            | 214728     |
| 25 | 14 and 24                                                                                                                                                                                                                                                                             | 68         |
| 26 | from 25 keep 1                                                                                                                                                                                                                                                                        | 1          |

Suchergebnisse: from 25 [14 and 24] keep 1

Verfügbare Ergebnisse: 1

Angezeigte Ergebnisse: #1

### **Online supplement 3. Form for guidance of title and abstract screening process.**

#### **Inclusion Criteria**

##### **Population:**

- Patients with chronic obstructive pulmonary disease (COPD)
- Other populations including COPD patients:
  - if they report results separately for each disease → order full text (1)
  - if they don't report the results separately and COPD population is ≥90% → order full text (1)
  - if they don't report the results separately and COPD population is <90% → exclude (0)
  - if the abstract doesn't explicit the previous points → order full text (1)

##### **Type of article:**

Articles that consider:

- measures of physical activity (PA) (any activity monitors and questionnaires -see *below list of questionnaires which we should consider*);
- and any other variable that is associated/correlated with PA, as potential determinant/outcome (e.g. age, BMI, co-morbidities, FEV<sub>1</sub>, systemic inflammation, exacerbations, health care use, dyspnea, quality of life, exercise capacity, social participation, etc).

Note: we won't consider PA as measures of fitness/exercise capacity (e.g. 6MWT)

##### **Study design:**

- Longitudinal observational studies: prospective and retrospective studies.
- Experimental studies if have "physical activity" as an outcome.
- Cross-sectional studies.
- Validation of PA instruments if they include associations with other variables.

#### **Exclusion criteria**

Language restrictions: none

If the Abstract is not clear enough on the eligibility criteria or does not contain the necessary information → please be conservative and order full text (1)

Use your user filed to classify title & abstract screening in RefWorks file:

0 = exclude

1 = order for full text

2 = related study that may be useful reference

**List of questionnaires to be consider in this review:**

- The Activities Checklist, Arbuckle, 1994
- Zutphen Physical Activity Questionnaire, Caspersen, 1991
- The Adelaide Activities Profile (AAP), Clark, 1995
- The Customary Activity Questionnaire, Dallosso, 1988
- The YALE Physical Activity Survey for Older Adults (YPAS), Dipietro, 1993
- Meaningful Activity Participation Assessment (MAPA), Eakman, 2007
- The Lifetime Total Physical Activity Questionnaire, Friedenreich, 1998
- The Physical Activity Questionnaire, Liu, 2001
- The Veterans Specific Activity Questionnaire (VSAQ), Myers, 1994
- The Physical Activity and Disability Survey (PADS), Rimmer, 2001
- The LSA Physical Activity Questionnaire (LAPAQ), Stel, 2003
- CHAMPS Physical Activity Questionnaire, Stewart, 2001
- Physical activity questionnaire, Voorrips, 1991
- The Physical Activity Scale for the Elderly (PASE), Washburn, 1993
- Scale of Older Adults' Routine (SOAR), Zisberg, 2005

## Online supplement 4. Form for guidance of full text assessment process.

Decide on in- and exclusion of study based on the full text and the following inclusion criteria (Systematic review 5 – Conceptual model)

Reviewer:                      1st Author:                      Year:                      Language:

### Inclusion criteria:

- |                                                                                                                                                                                                                                             |          |
|---------------------------------------------------------------------------------------------------------------------------------------------------------------------------------------------------------------------------------------------|----------|
| 1. Patients with COPD defined by spirometry (any definition as long as it is based on spirometry such as the current one: $FEV_1/FVC < 0.7$ and $FEV_1$ in % predicted $< 80\%$ ) (NOTE: consider also item a in case of other populations) | Yes / No |
| a. Other populations including COPD patients: the authors report results separately for each disease or they don't report the results separately but COPD population (also by spirometry) is $\geq 90\%$                                    | Yes / No |
| 2. Study considers measurement of $PA^1$ (activity monitor or questionnaire (see example*))                                                                                                                                                 | Yes / No |
| 3. Study considers any measurements that may be (at least one):                                                                                                                                                                             | Yes / No |
| a. a determinant of PA in COPD (defined using any measure of association (e.g. OR, HR, etc.) but not an agreement measure (correlation coefficient, Bland-Altman plot, p-value for mean difference, etc.)) or                               |          |
| b. an outcome of PA in COPD (defined using any measure of association (e.g. OR, HR, etc.) but not an agreement measure (correlation coefficient, Bland-Altman plot, p-value for mean difference, etc.))                                     |          |
| 4. Study design is:                                                                                                                                                                                                                         | Yes / No |
| - longitudinal observational studies (prospective and retrospective) or                                                                                                                                                                     |          |
| - experimental studies if have PA as an outcome / determinant or                                                                                                                                                                            |          |
| - cross-sectional studies or                                                                                                                                                                                                                |          |
| - validation of PA instruments if they include associations with other variables                                                                                                                                                            |          |

If not included, specify reasons below:

- ☐ Study doesn't show an association measure, but an agreement measure (correlation coefficient, Bland-Altman plot, p-value for mean difference, etc.)
- ☐ Not relevant patient group
- ☐ Study does not consider  $PA^1$
- ☐ PA is measured as exercise/fitness capacity (eg: 6-minute walk distance, maximal exercise test)
- ☐ Article presents data from review and no primary data
- ☐ Other: \_\_\_\_\_

Final decision: Include ☐ Exclude ☐

**\*Questionnaires need to include, according to the definition by Caspersen, a quantitative measure of PA (e.g. time spent at x METs) or ADL or I-ADL. Examples of PA questionnaires include but are not restricted to:**

- The Activities Checklist, Arbuckle, 1994
- Zutphen Physical Activity Questionnaire, Caspersen, 1991
- The Adelaide Activities Profile (AAP), Clark, 1995
- The Customary Activity Questionnaire, Dallosso, 1988
- The YALE Physical Activity Survey for Older Adults (YPAS), Dipietro, 1993
- Meaningful Activity Participation Assessment (MAPA), Eakman, 2007
- The Lifetime Total Physical Activity Questionnaire, Friedenreich, 1998
- The Physical Activity Questionnaire, Liu, 2001
- The Veterans Specific Activity Questionnaire (VSAQ), Myers, 1994
- The Physical Activity and Disability Survey (PADS), Rimmer, 2001
- The LSA Physical Activity Questionnaire (LAPAQ), Stel, 2003
- CHAMPS Physical Activity Questionnaire, Stewart, 2001
- Physical activity questionnaire, Voorrips, 1991
- The Physical Activity Scale for the Elderly (PASE), Washburn, 1993
- Scale of Older Adults' Routine (SOAR), Zisberg, 2005

## **Online supplement 5. Details on methods of data extraction and quality assessment.**

The following information was extracted from each included study: (i) bibliographic details such as first author, year, journal, and aim of the study; (ii) study description such as study design, setting, recruitment method, study group characteristics (sample size, sex, age, smoking habit, lung function parameters, dyspnoea, body mass index (BMI)); (iii) measurement of physical activity such as direct and/or indirect measure, and physical activity variables; (iv) information related to determinants of physical activity (if any) such as determinant name, estimate of the association, statistical test or model, and covariates; (v) information related to outcomes of physical activity (if any) such as outcome name, estimate of the association, statistical test or model, and covariates; and (vi) comments from the reviewers. In studies that compared COPD patients with healthy subjects, we extracted only data for the COPD group.

The GRADE approach is used by more than 70 organizations to establish the confidence in effect estimates based on the underlying quality of the evidence. This approach rates the quality of evidence for each variable across studies, this does not rate each study as a single unit. Four reviewers assessed the quality of evidence for each association and reached a consensus on the final rating. Each association started at ++++ (high quality = high confidence that the true effect lies close to that of the estimate of the effect and more studies are unlikely to change the estimate) and was downgraded for specific reasons<sup>S88 S89</sup>. The criteria, all of them referring to threats to validity, to up- or downgrade the confidence in effect estimates were: (i) direction of association; (ii) control for confounding; (iii) consistency of association across studies; (iv) strength of association; (v) directness; (vi) applicability of results to a broader COPD population; (vii) precision; (viii) other: e.g. publication bias or different measures of physical activity. For each threat to validity, we downgraded the confidence rating by -1 but did not further downgrade if the quality was very low (i.e., there is a little

confidence in the effect estimate, the true effect is likely to be substantially different from the estimate of effect and more studies are very likely to change the estimate). The assessment of the quality of evidence for this systematic review was focused on those determinants and outcomes of physical activity assessed by at least 2 manuscripts.

**Online supplement Table 1. Reason for exclusion after full text assessment and data extraction process.**

| Reference                                             | Reason for exclusion                                            |
|-------------------------------------------------------|-----------------------------------------------------------------|
| Abdellaoui, A. 2011, Fund Clin Pharmacol              | Other: conference abstract                                      |
| Ade-Oshifogun, J. 2008                                | Other: conference abstract                                      |
| Ade-Oshifogun, J. 2009                                | Other: conference abstract                                      |
| Ade-Oshifogun, J. 2012, J Nurs Scholar                | No physical activity measure provided                           |
| Agarwal, V. 2012, J Cardiopulm Rehab Prev             | No information on determinants or outcomes of physical activity |
| Aguilaniu, BC. 2010, Int J Chron Obstruct Pulm Dis    | No primary data showed                                          |
| Al Ahmari, AD. 2011, Am J Respir Crit Care Med        | Other: conference abstract                                      |
| Alcazar, B. 2012, Arch Bronconeumol                   | No physical activity measure provided                           |
| Altenburg, WA. 2011, Am J Respir Crit Care Med        | Other: conference abstract                                      |
| Alvarez-Gutierrez, F. 2007, Arch Bronconeumol         | No physical activity measure provided                           |
| Alvarez-Nemegyei, J. 2006, Rev Med Instit Mex Seg Soc | No relevant population included                                 |
| Amudhan, SR.2011, Natl Med J India                    | No relevant population included                                 |
| Ando, M. 2003, Nihon Kokyuki Gakkai Zasshi            | Other: Japanese language                                        |
| Anonymous. 2010, Harvard Mens Health Watch            | No primary data showed                                          |
| Antonelli-Incalzi, R. 2007, Dem Geriat Cog Dis        | No information on determinants or outcomes of physical activity |
| Archibald, CJ. 1987, Can J Rehab                      | No physical activity measure provided                           |
| Arne,M. 2011. Int J Chron Obstruct Pulm Dis           | No relevant population included                                 |
| Arvidsson, D. 2006, Clin Nutr                         | No assumption of directionality                                 |
| Avdeeva, E. 2000, Klin Med                            | Other: Russian language                                         |
| Bae, YO. 2003, Tuberc Respir Dis                      | Other: Korean language                                          |
| Balcells Vilarnau, E. 2007, Arch Bronconeumol         | No primary data showed                                          |
| Barchfeld,T. 1999, Med Klin                           | No assumption of directionality                                 |
| Batty, G. 2003, Am J Public Health                    | No relevant population included                                 |
| Bauldoff, G. 2002, Chest                              | No physical activity measure provided                           |
| Behnke, M. 2000, Respir Med                           | No physical activity measure provided                           |
| Belfer, MH. 2007, COPD                                | No primary data showed                                          |
| Beling, J. 2009, Cardiopul Phys Ther Journal          | No physical activity measure provided                           |
| Bell, KR. 2004, Arch Phys Med Rehabil                 | No information on determinants or outcomes of physical activity |



|                                                     |                                                                 |
|-----------------------------------------------------|-----------------------------------------------------------------|
| Belza, B. 2001, Nurs Res                            | No assumption of directionality                                 |
| Bentsen,SB. 2010, Patient Educ Couns                | No physical activity measure provided                           |
| Biger, M. 2010, Fundam Clin Pharmacol               | Other: conference abstract                                      |
| Bon, JM. 2010, Am J Respir Crit Care Med            | Other: conference abstract                                      |
| Bridevaux, PO. 2009, Eur Respir J                   | Sample includes <90% COPD                                       |
| Burr, JF. 2012, Can Fam Phys                        | No primary data showed                                          |
| Camillo, C. 2008, Lung                              | No assumption of directionality                                 |
| Cantley, MEG. 2001 (thesis)                         | No assumption of directionality                                 |
| Carrieri-Kohlman, V. 2005, J Cardiopulm Rehabil     | No physical activity measure provided                           |
| Carter, R. 2002, J Cardiopulm Rehabil               | No assumption of directionality                                 |
| Carter, R. 2011, JNP                                | No primary data showed                                          |
| Casaburi, RC. 2007, COPD                            | No primary data showed                                          |
| Castro, AAM. 2012, Clinics                          | No physical activity measure provided                           |
| Cavalheri, V. 2011, Respir Med                      | No assumption of directionality                                 |
| Cazzola, M. 2010, Respir Med                        | Other: short term pharma study                                  |
| Centers for Disease Control and Prevention. 2001    | No relevant population included                                 |
| Chang, A. 2008, Contemp Clin Trials                 | No primary data showed                                          |
| Chen, G. 2011, J Cent South Univ (Medical sciences) | Other: Chinese language                                         |
| Cheng, YJ. 2003, Br J Sports Med                    | No relevant population included                                 |
| Christensen, CC. 2004, Eur Respir J                 | No physical activity measure provided                           |
| Chu, LW. 1999, Gerontology                          | No relevant population included                                 |
| Cindy Ng, LW. 2012, Disab Rehab                     | No information on determinants or outcomes of physical activity |
| Clark, N. 2009, Int J Chron Obstruct Pulm Dis       | No primary data showed                                          |
| Cohen, MD. 2010, J Cardiopulm Rehabil               | No assumption of directionality                                 |
| Cohen, MD. 2011, Am J Respir Crit Care Med          | Other: conference abstract                                      |
| Cohen, MD. 2012, COPD                               | No information on determinants or outcomes of physical activity |
| Cooper, CB. 2011, Am J Respir Crit Care Med         | Other: conference abstract                                      |
| Coronell, C. 2004, Eur Respir J                     | No assumption of directionality                                 |
| Correa, KS. 2011, Rev Brasil Fisioter               | No assumption of directionality                                 |
| Costa, F. 2011, Am J Respir Crit Care Med           | Other: conference abstract                                      |
| Costi, S. 2009, Chest                               | No physical activity measure provided                           |
| Covey, MK. 2004, Am J Nurs                          | No primary data showed                                          |
| Cutaia, M. 2011, Lung                               | No information on determinants or outcomes of physical activity |
| de Torres, JP. 2006, Health Qual Life               | No physical activity measure provided                           |

| Outcomes                                            |                                                                 |
|-----------------------------------------------------|-----------------------------------------------------------------|
| Dechman, G. 2008, Cardiopulm Phys Ther J            | No primary data showed                                          |
| Denkinger, MD. 2012, Z Gerontol Geriatr             | No relevant population included                                 |
| DePew, ZS. 2012, Chron Respir Dis                   | No information on determinants or outcomes of physical activity |
| DePew, ZS. 2013, Respir Care                        | No relevant population included                                 |
| Dobosz, K. 2007, Fam Med Prim Care Rev              | Sample includes <90% COPD                                       |
| Dodd, JW. 2011, Am J Respir Crit Care Med           | Other: conference abstract                                      |
| Dolmage, TE. 2012, Chest                            | No physical activity measure provided                           |
| Donaire-Gonzalez, D. 2011, Arch Bronconeumol        | No information on determinants or outcomes of physical activity |
| Donesky-Cuenca, D. 2007, Heart Lung                 | No information on determinants or outcomes of physical activity |
| Dubbert, PM. 2002, J Gerontology                    | No relevant population included                                 |
| Dyer, CA. 2012, Physiother                          | No information on determinants or outcomes of physical activity |
| Dyer, CAE. 2002, Thorax                             | No relevant population included                                 |
| Eakin, EG. 1997, J Health Psych                     | No relevant population included                                 |
| Eisner, MD. 2008, Am J Med                          | Results not provided for only COPD                              |
| Eisner, MD. 2011, Thorax                            | No physical activity measure provided                           |
| Emery, CF. 1998, Health Psych                       | No physical activity measure provided                           |
| Emery, CF. 2001, Am J Respir Crit Care Med          | No physical activity measure provided                           |
| Emery, CF. 2003, Health Psych                       | No assumption of directionality                                 |
| Evans, RA. 2011, Chest                              | No physical activity measure provided                           |
| Fernandes, FL. 2010, J Bras Pneumol                 | No physical activity measure provided                           |
| Folgering, H. 1994, Int J Sports Med                | No primary data showed                                          |
| Fong, KN. 2010, Indoor Air                          | No information on determinants or outcomes of physical activity |
| Frey, JG. 1998, Rev Mal Respir                      | No assumption of directionality                                 |
| Furlanetto, KC. 2010, Arch Phys Med Rehab           | No information on determinants or outcomes of physical activity |
| Gagnon, P. 2011, Am J Respir Crit Care Med          | Other: conference abstract                                      |
| Garcia-Aymerich, J. 2007, Am J Respir Crit Care Med | No primary data showed                                          |
| Garcia-Aymerich, J. 2009, Arch Bronconeumol         | No primary data showed                                          |
| Garcia-Polo, C. 2012, Respir Med                    | No physical activity measure provided                           |
| Garcia-Rio, F. 2011, Chest                          | No physical activity measure provided                           |
| Garcia-Rio, FC. 2007, Med Clin                      | No primary data showed                                          |
| Garfield, BE. 2012, Eur Respir J                    | No assumption of directionality                                 |
| Garrod, R. 2000, Respir Med                         | No assumption of directionality                                 |

|                                                |                                                                 |
|------------------------------------------------|-----------------------------------------------------------------|
| Gause-Nilsson, I. 1999, J Nutr Health Aging    | No relevant population included                                 |
| Goris, AHC. 2003, Br J Nutr                    | No assumption of directionality                                 |
| Gorzelniaak, L. 2012, COPD                     | No assumption of directionality                                 |
| Gosker, HR. 2003, Chest                        | No assumption of directionality                                 |
| Gouzi, F. 2011, Arch Phys Med Rehab            | No information on determinants or outcomes of physical activity |
| Greenland, P. 2001, J Cardiopulm Rehab         | Other: conference abstract                                      |
| Grimby, GC. 1977, Bull Eur Physiopathol Respir | No primary data showed                                          |
| HajGhanbari, B. 2011, Respir Med               | No assumption of directionality                                 |
| Hannink, JDC. 2010, Chest                      | No physical activity measure provided                           |
| Hartman, JE. 2011, Am J Respir Crit Care Med   | Other: conference abstract                                      |
| Hassanein, SE. 2009, J Cardiopulm Rehab        | No physical activity measure provided                           |
| Haughney, J. 2004, Prim Care Resp J            | No primary data showed                                          |
| He, J. 2006, N Engl J Med                      | No primary data showed                                          |
| Hecht, A. 2009, COPD                           | No assumption of directionality                                 |
| Heppner, PS. 2006, J Cardiopulm Rehab          | No physical activity measure provided                           |
| Herlitz, J. 2005, Int J Cardiol                | No relevant population included                                 |
| Hernandes, NA. 2009, J Bras Pneumol            | No assumption of directionality                                 |
| Hill, K. 2010, Thorax                          | No information on determinants or outcomes of physical activity |
| Hill, K. 2011, Respiriology                    | Other: conference abstract                                      |
| Hill, K. 2012, Chest                           | No information on determinants or outcomes of physical activity |
| Hirayama, F. 2010, J Phys Act Health           | No relevant population included                                 |
| Houchen, L. 2011, Physiotherapy                | No physical activity measure provided                           |
| Hudon, C. 2008, Can Fam Phys                   | No primary data showed                                          |
| Hukkinen, M. 2009, COPD                        | No relevant population included                                 |
| Hyland, ME. 1999, Psych Health Med             | No assumption of directionality                                 |
| Incalzi, RA. 1998, Respir Med                  | No physical activity measure provided                           |
| Incalzi, RA. 2005, Chest                       | No relevant population included                                 |
| Isoaho, R. 1995, Scand J Prim Health Care      | No assumption of directionality                                 |
| Jackson, AS. 2013, Eur Respir J                | No assumption of directionality                                 |
| Janssens, T. 2011, Chest                       | No physical activity measure provided                           |
| Jardim, JR. 2011, Am J Respir Crit Care Med    | Other: conference abstract                                      |
| Jehn, ML. 2011, Eur J Cardiovasc Prev Rehabil  | Other: conference abstract                                      |
| Jehn, ML. 2011, Respir Med                     | No assumption of directionality                                 |
| Jeng, C. 2003, Heart Lung                      | No physical activity measure provided                           |
| Jonkers, CC. 2012, Int Psychoger               | No physical activity measure provided                           |

|                                             |                                                                 |
|---------------------------------------------|-----------------------------------------------------------------|
| Ju, CR. 2011, Respiriology                  | Other: conference abstract                                      |
| Ju,CC. 2009, Respiriology                   | Other: conference abstract                                      |
| Kajiwar, T. 2010, Am J Respir Crit Care Med | Other: conference abstract                                      |
| Kanda, M. 2012, Int Med                     | No information on determinants or outcomes of physical activity |
| Kanervisto, M. 2010, Chron Respir Dis       | No physical activity measure provided                           |
| Kao, MC. 2011, PM and R                     | Other: conference abstract                                      |
| Kapella, MC. 2006, Nurs Res                 | No physical activity measure provided                           |
| Kapella, MC. 2011, Med Sci Sports Exerc     | No physical activity measure provided                           |
| Kaptein, AA. 1993, Eur Respir J             | No assumption of directionality                                 |
| Kato, DJ. 2012, J Cardiopulm Rehab Prev     | No physical activity measure provided                           |
| Katula, JA. 2004, Health Qual Life Outcomes | No physical activity measure provided                           |
| Katz, P. 2011, J Cardiopulm Rehab Prev      | No relevant population included                                 |
| Katz, PP. 2010, Chest                       | Sample includes <90% COPD                                       |
| Katz, PP. 2010, J Cardiopulm Rehab          | No relevant population included                                 |
| Kim, S. 2004, Chest                         | No relevant population included                                 |
| Kim, SH. 2011, Korean J Fam Med             | No physical activity measure provided                           |
| Kiyokawa, N. 2009, Respiriology             | Other: conference abstract                                      |
| Kon, SS. 2011, Thorax                       | No primary data showed                                          |
| Kon, SS. 2011, Thorax                       | Other: conference abstract                                      |
| Koo, P. 2009, Chest                         | Other: conference abstract                                      |
| Kovelis, D. 2011, COPD                      | No physical activity measure provided                           |
| Kuyucu, T. 2011, Tuberk Toraks              | No relevant population included                                 |
| Kwua-Yun, W. 2012, Respir Care              | No physical activity measure provided                           |
| Lahaije, AJ. 2010, Respir Med               | No information on determinants or outcomes of physical activity |
| Langer, D. 2009, J Heart Lung Transplant    | No relevant population included                                 |
| Langer, D. 2009, Thorax                     | No primary data showed                                          |
| Langer, D. 2011, Am J Respir Crit Care Med  | Other: conference abstract                                      |
| Langer, D. 2012, Respir Med                 | No relevant population included                                 |
| Lareau, SC. 2005, Int J Ther Rehabil        | No primary data showed                                          |
| Larson, JL. 2007, COPD                      | No primary data showed                                          |
| Larson, JL. 2011, Am J Respir Crit Cre Med  | Other: conference abstract                                      |
| Lautenschlager, NT. 2006, Cur Opinion Psych | No primary data showed                                          |
| Lee, AH. 2011, Ann Epidemiol                | No information on determinants or outcomes of physical activity |
| Lee, JS. 2007, Gerontology                  | No relevant population included                                 |
| Leff, B. 2009, J Am Geriatr Soc             | No relevant population included                                 |
| Leidy,NK. 1999, Respir Care                 | No assumption of directionality                                 |
| Leung, RW. 2011, Contemp Clin Trials        | No physical activity measure provided                           |

|                                                    |                                       |
|----------------------------------------------------|---------------------------------------|
| Lewis, KE. 2011, Am J Respir Crit Care Med         | Other: conference abstract            |
| Lewis, MJ. 2009, Clin Physiol Funct Imaging        | No physical activity measure provided |
| Liddell, F. 2010, Physiotherapy                    | No physical activity measure provided |
| Lomundal, BK. 2012, Int J Chron Obstruct Pulm Dis  | No physical activity measure provided |
| Lopez Varela, MV. 2010, Eur Respir J               | No physical activity measure provided |
| Mackenbach, JP. 2001, J Epidemiol Community Health | No relevant population included       |
| Magnussen, H. 2009, Med Klin                       | No primary data showed                |
| Magnussen, H. 2009, Proc Am Thorac Soc             | No primary data showed                |
| Man, WD. 2009, Thorax                              | Other: conference abstract            |
| Mannino, DM. 2002, Respir Care                     | No relevant population included       |
| Mantoani, LC. 2011, Rev Brasil Fisiot              | No assumption of directionality       |
| Matsunaga, H. 2011, Am J Respir Crit Care Med      | Other: conference abstract            |
| McGlone, S. 2006, COPD                             | No assumption of directionality       |
| Medhi, GK. 2006, J Assoc Physicians India          | No relevant population included       |
| Menotti, A. 1985, J Epidemiol Community Health     | No relevant population included       |
| Metzner, HL. 1983, Prev Med                        | No relevant population included       |
| Mikami, M. 1995, Japanese J Thorac Dis             | Other: Japanese language              |
| Miller, RR. 2004, J Am Geriatr Soc                 | Sample includes <90% COPD             |
| Miravittles, M. 2009, Thorax                       | No assumption of directionality       |
| Miravittles, M. 2013, Respir Med                   | No physical activity measure provided |
| Mittal, N. 2011, J Invest Med                      | Other: conference abstract            |
| Mok, M. 2012, J Am Coll Cardiol                    | Other: conference abstract            |
| Monso, E. 1998, Respir Med                         | No assumption of directionality       |
| Montes de Oca, M. 2009, Respir Med                 | No physical activity measure provided |
| Moore, R. 2009, J Cardiopulm Rehab                 | No assumption of directionality       |
| Morgan, M. 2003, Thorax                            | No primary data showed                |
| Morgan, M. 2008, Thorax                            | No primary data showed                |
| Morimoto, M. 2003, Nihon Kango Kagakkai Shi        | No assumption of directionality       |
| Morimoto, M. 2004, Nurs Health Sci                 | Other: Japanese language              |
| Moy, ML. 2008, J Rehabil Res Dev                   | No assumption of directionality       |
| Moy, ML. 2010, Am J Respir Crit Care Med           | Other: conference abstract            |
| Nader, GA. 2009, Curr Opin Rheumatol               | No relevant population included       |
| Nakamura, Y. 2001, Nihon Kokyuki Gakkai Zasshi     | Other: Japanese language              |
| Nejjari, C. 1997, Rev Epidemiol Sante Publique     | No relevant population included       |

|                                                   |                                                                 |
|---------------------------------------------------|-----------------------------------------------------------------|
| Nguyen, HQ. 2011, J Nurs Meas                     | No information on determinants or outcomes of physical activity |
| Nguyen, HQ. 2012, Arch Phys Med Rehab             | No assumption of directionality                                 |
| No author. 2002, SportEX Health                   | No primary data showed                                          |
| No author. 2006, Am J Nurs                        | No primary data showed                                          |
| No author. 2006, Medicina Sport                   | No primary data showed                                          |
| No author. 2008, Cardiology Rev                   | No primary data showed                                          |
| No author. 2008, South Online J Nurs Res          | No physical activity measure provided                           |
| Novoa, N. 2009, Interact Cardiovasc Thorac Surg   | No relevant population included                                 |
| Ohar, J. 2006, J Respir Dis                       | No primary data showed                                          |
| Ortega, FB. 2010, J Allergy Clin Immunol          | No relevant population included                                 |
| Ozkan, S. 2009, Saudi Med J                       | No assumption of directionality                                 |
| Ozkan, S. 2012, Nobel Med                         | No physical activity measure provided                           |
| Paffenbarger, R. 1978, Am J Epidemiol             | No relevant population included                                 |
| Parada, A. 2011, Rev Med Chil                     | No assumption of directionality                                 |
| Parshin, VD. 2009, Khirurgiia                     | No physical activity measure provided                           |
| Partridge, MR. 2010, Eur Respir J                 | No physical activity measure provided                           |
| Patel, SA. 2005, Respiration                      | No primary data showed                                          |
| Pavord, ID. 2009, Lancet                          | No primary data showed                                          |
| Perez-Castejon, J. 2007, Rev Multidiscip Gerontol | No primary data showed                                          |
| Petersen, AMW. 2008, Scand J Med Sci Sports       | No physical activity measure provided                           |
| Pison, CC. 1999, Rev Mal Respir                   | No primary data showed                                          |
| Pitta, F. 2005, Am J Respir Crit Care Med         | No assumption of directionality                                 |
| Pitta, F. 2005, Arch Phys Med Rehab               | No assumption of directionality                                 |
| Regueiro, EM. 2009, Clinics                       | No assumption of directionality                                 |
| Reilly, K. 2008, Am J Epidemiol                   | No physical activity measure provided                           |
| Ren, XS. 1998, Med Care                           | No physical activity measure provided                           |
| Riddoch-Contreras, J. 2012, COPD                  | No relevant population included                                 |
| Ringbaek, TJ. 2001, Respir Med                    | No physical activity measure provided                           |
| Robles, P. 2012, Can Respir J                     | Other: conference abstract                                      |
| Roig, M. 2011, Physiother Can                     | No relevant population included                                 |
| Ruhle, KH. 2009, Pneumologie                      | No information on determinants or outcomes of physical activity |
| Salvi, SS. 2009, Lancet                           | No primary data showed                                          |
| Schonhofer, B. 1997, Eur Respir J                 | No assumption of directionality                                 |
| Serres, I. 1998, Chest                            | No assumption of directionality                                 |
| Shed, D. 2012, Phys Ther Rev                      | No primary data showed                                          |

|                                                         |                                                                 |
|---------------------------------------------------------|-----------------------------------------------------------------|
| Shephard, RJC. 1982, Ann Clin Res                       | No primary data showed                                          |
| Sherrill, DM. 2005, J Neuroeng Rehabil                  | No assumption of directionality                                 |
| Shrikrishna, D. 2011, Thorax                            | Other: conference abstract                                      |
| Shrikrishna, D. 2012, Eur Respir J                      | No assumption of directionality                                 |
| Simon, KM. 2011, Rev Brasil Fisiot                      | No assumption of directionality                                 |
| Singh, SJ. 2001, J Cardiopulm Rehabil                   | No assumption of directionality                                 |
| Singh, SJ. 2001, Respir Med                             | No assumption of directionality                                 |
| Slinde, F. 2003, Clin Nut                               | No assumption of directionality                                 |
| Smith, BJ. 2002, Chron Respir Dis                       | COPD diagnosis not defined by spirometry                        |
| Smith, BJ. 2005, Med J Aust                             | No relevant population included                                 |
| Snijders, MC. 1998, Stud Health Technol Inform          | No physical activity measure provided                           |
| Snijders, MC. 2002, Gerontechnology                     | No information on determinants or outcomes of physical activity |
| So, CT. 2008, OTJR: Occup, Particip Health              | No information on determinants or outcomes of physical activity |
| Soguel Schenkel, N. 1996, Eur Respir j                  | No physical activity measure provided                           |
| Soicher, JE. 2010, Dissertation Abstracts International | Other: conference abstract                                      |
| Soicher, JE. 2012, Eur Respir J                         | No information on determinants or outcomes of physical activity |
| Sorino, C. 2009, Am J Respir Crit Care Med              | No primary data showed                                          |
| Steele, BG. 2000, Chest                                 | No assumption of directionality                                 |
| Steele, BG. 2003, J Rehabil Res Dev                     | No primary data showed                                          |
| Steele, BG. 2008, Arch Phys Med Rehab                   | Sample includes <90% COPD                                       |
| Stein, MB. 2006, Psychol Med                            | No physical activity measure provided                           |
| Steinsbekk, A. 2009, Chron Respir Dis                   | No physical activity measure provided                           |
| Stepanishcheva, LA. 2005, Klin Med                      | Other: Russian language                                         |
| Stieb, DM. 2000, Can J Public Health                    | No relevant population included                                 |
| Sugino, A. 2012, Respiration                            | No assumption of directionality                                 |
| Swallow, EB. 2007, J Appl Physiol                       | No assumption of directionality                                 |
| Swisher, AC. 2006, Cardiopulm Phys Ther J               | No primary data showed                                          |
| Swisher, AC. 2008, Cardiopulm Phys Ther J               | No primary data showed                                          |
| Szmidt, M. 2012, Pneumol Alergol Polska                 | Other: Polish language                                          |
| Tanaka, Y. 2008, Respirology                            | No physical activity measure provided                           |
| Tanaka, Y. 2009, Respirology                            | Other: conference abstract                                      |
| Tantucci, C. 2012, Endocrine                            | No primary data showed                                          |
| Thomas, MJ. 2010, Physiotherapy                         | No primary data showed                                          |
| Toh, CK. 2006, J Clin Oncol                             | No primary data showed                                          |
| Troosters, T. 2010, Eur Respir J                        | No physical activity measure provided                           |

|                                                       |                                         |
|-------------------------------------------------------|-----------------------------------------|
| Vaes, AW. 2012, PloS ONE                              | No physical activity measure provided   |
| Van den Borst B, 2011, Am J Respir Crit Care Med      | Other: conference abstract              |
| Van den Borst B, 2011, Thorax                         | No relevant population included         |
| Van Der Horst-Graat, JM. 2007, J. Nutr. Health Aging  | No relevant population included         |
| Van Dijk, PTM. 2005, J Am Geriatr Soc                 | No relevant population included         |
| Van Gestel, AJ. 2012, Respiration                     | No assumption of directionality         |
| Van Helvoort, HA. 2011, Arch Phys Med Rehab           | No physical activity measure provided   |
| Van Manen, JG. 2002, Thorax                           | No physical activity measure provided   |
| Van Remoortel, H. 2011, Am J Respir Crit Care Med     | Other: conference abstract              |
| Varga, J. 2007, Respir Med                            | No physical activity measure provided   |
| Varraso, R. 2007, Am J Epidemiol                      | COPD diagnosis no defined by spirometry |
| Varraso, R. 2007, Thorax                              | COPD diagnosis no defined by spirometry |
| Varraso, R. 2012, Am J Clin Nutr                      | No primary data showed                  |
| Velloso, M. 2006, Chest                               | No assumption of directionality         |
| Venkata, A. 2012, J Cardiopulm Rehab Prev             | No assumption of directionality         |
| Vilaro, J. 2007, Med Clin (Barc)                      | No assumption of directionality         |
| Volpato, S. 2008, J Gerontol A Biol Sci Med Sci       | No relevant population included         |
| Vozoris, NT. 2012, Can Respir J                       | No relevant population included         |
| Walker, PC. 2009, Chron Respir Dis                    | No primary data showed                  |
| Walters, JA. 2011, Respirology                        | Other: conference abstract              |
| Walters, JA. 2012, Respirology                        | Other: conference abstract              |
| Waschki, B. 2011, Am J Respir Crit Care Med           | Other: conference abstract              |
| Waschki, B. 2012, Respir Med                          | No assumption of directionality         |
| Williams, V. 2011, Qual Health Res                    | No physical activity measure provided   |
| Willis, JR. 2012, Arch Ophthalmol                     | No relevant population included         |
| Winkelman, CC. 2010, Heart Lung                       | No assumption of directionality         |
| Wouters, EF. 2011, Chest                              | No primary data showed                  |
| Wust, R. 2008, Eur J Appl Physiol                     | No relevant population included         |
| Xu, F. 2005, Chest                                    | No relevant population included         |
| Yeh, M. 2004, J Adv Nurs                              | No assumption of directionality         |
| Yentes, JM. 2011, Respir Med                          | No relevant population included         |
| Zagol, B. 2010, Am J Cardiol                          | No relevant population included         |
| Zanocchi, M. 2002, Minerva Med                        | Other: Italian language                 |
| Zhang, Z. 2008, JCR                                   | Other: Chinese language                 |
| Zhang, Z. 2008, Zhongguo Wei Zhong Bing Ji Jiu Yi Xue | Other: Chinese language                 |



|                                            |                                 |
|--------------------------------------------|---------------------------------|
| Zhou, JH. 2006, Chin J Clin Rehabil        | Other: Chinese language         |
| ZuWallack, R. 1998, Monaldi Arch Chest Dis | No primary data showed          |
| Zwerink, M. 2013, Respir Med               | No assumption of directionality |

**Online supplement Table 2. Design, patients' characteristics and instruments for measuring physical activity of 86 studies reporting associations between physical activity and its determinants or outcomes in COPD patients.**

| Reference                                       | Study design                    | Study group characteristics                           |                             |                                                                          |                                                                          |                                                                                | Measure of physical activity                                   |                                                                  |
|-------------------------------------------------|---------------------------------|-------------------------------------------------------|-----------------------------|--------------------------------------------------------------------------|--------------------------------------------------------------------------|--------------------------------------------------------------------------------|----------------------------------------------------------------|------------------------------------------------------------------|
|                                                 |                                 | n                                                     | Sex (male),<br>n (%)        | Age (yr),<br>mean (SD)                                                   | FEV <sub>1</sub> (%pred),<br>mean (SD)                                   | BMI (kg/m <sup>2</sup> ),<br>mean (SD)                                         | Direct method                                                  | Indirect method                                                  |
| Altenburg, WA. 2013, Respir Med <sup>S1</sup>   | cross-sectional                 | 155                                                   | 102 (66)                    | median ( <i>P</i> <sub>25</sub> - <i>P</i> <sub>75</sub> )<br>62 (54-69) | median ( <i>P</i> <sub>25</sub> - <i>P</i> <sub>75</sub> )<br>60 (40-75) | median ( <i>P</i> <sub>25</sub> - <i>P</i> <sub>75</sub> )<br>26.1 (22.8-29.0) | Pedometer:<br>Digiwalker SW-200; Yamax, Tokyo, Japan           | --                                                               |
| Beauchamp, MK. 2012, Chest <sup>S2</sup>        | cross-sectional                 | 37                                                    | 17 (46)                     | 71 (7)                                                                   | 39 (16)                                                                  | 28.9 (10.5)                                                                    | --                                                             | Physical Activity Scale for the Elderly (PASE) (Washburn, 1993)  |
| Behnke, M. 2005, Respir Med <sup>S3</sup>       | non-randomized controlled study | 88                                                    | 71 (81)                     | 60 (8)                                                                   | 43 (14)                                                                  | 24.3 (3.6)                                                                     | Accelerometer:<br>Trictrac-R3D; Stayhealthy, Monrovia, CA, USA | --                                                               |
| Bendstrup, KE. 1997, Eur Respir J <sup>S4</sup> | randomized controlled trial     | Experimental group (EG): 16<br>Control group (CG): 16 | EG: 9 (55)<br>CG: 9 (56)    | EG: 64 (3)<br>CG: 65 (2)                                                 | not available                                                            | not available                                                                  | --                                                             | Activities of Daily Living score specific for COPD (Ogden, 1985) |
| Benzo, R. 2010, Respiration <sup>S5</sup>       | cohort                          | Group 1 (G1): 394<br>Group 2 (G2): 203                | G1: 130 (33)<br>G2: 85 (42) | G1: 67 (6)<br>G2: 67 (6)                                                 | G1: 27 (7)<br>G2: 26 (6)                                                 | G1: 24.8 (3.5)<br>G2: 24.7 (3.7)                                               | --                                                             | Questions related physical activity*                             |
| Berry, M. 2006, Chest <sup>S6</sup>             | cross-sectional                 | 291                                                   | 166 (57)                    | 68 (8)                                                                   | 55 (18)                                                                  | 27.3 (5.4)                                                                     | --                                                             | The Fitness Arthritis and Seniors Trial functional performance   |

| Reference                                                | Study design                             | Study group characteristics         |                            |                                                                          |                                                                                    |                                        | Measure of physical activity                      |                                                                                              |
|----------------------------------------------------------|------------------------------------------|-------------------------------------|----------------------------|--------------------------------------------------------------------------|------------------------------------------------------------------------------------|----------------------------------------|---------------------------------------------------|----------------------------------------------------------------------------------------------|
|                                                          |                                          | n                                   | Sex (male),<br>n (%)       | Age (yr),<br>mean (SD)                                                   | FEV <sub>1</sub> (%pred),<br>mean (SD)                                             | BMI (kg/m <sup>2</sup> ),<br>mean (SD) | Direct method                                     | Indirect method                                                                              |
|                                                          |                                          |                                     |                            |                                                                          |                                                                                    |                                        |                                                   | inventory<br>(Rejeski, 1995)                                                                 |
| Berry, M. 2010, Respir Med <sup>S7</sup>                 | randomized non-controlled parallel study | G1: 89<br>G2: 87                    | G1: 48 (54)<br>G2: 47 (54) | G1: 66 (10)<br>G2: 66 (10)                                               | G1: 53 (19)<br>G2: 51 (20)                                                         | not available                          | --                                                | The Community Health Activities Model Program for Seniors (CHAMPS) (Stewart, 2001)           |
| Bestall, J. 1999, Thorax <sup>S8</sup>                   | cross-sectional                          | 100                                 | 55 (55)                    | median ( <i>P</i> <sub>25</sub> - <i>P</i> <sub>75</sub> )<br>70 (44-86) | Dyspnoea (MRC 3): 41 (15)<br>Dyspnoea (MRC 4): 37 (16)<br>Dyspnoea (MRC 5) 37 (15) | not available                          | --                                                | Nottingham Extended Activities of Daily Living (EADL) scale (Lincoln, 1992)                  |
| Bon, J. 2011, Am J Respir Crit Care Med <sup>S9</sup>    | cross-sectional                          | 190                                 | 98 (52)                    | 66 (7)                                                                   | 81 (22)                                                                            | 27.9 (4.1)                             | --                                                | Stanford Brief Activity Survey (SBAS) (Taylor-Piliae, 2006)                                  |
| Bossenbroek, L. 2009, J Heart Lung Transp <sup>S10</sup> | case-control                             | Cases (CA): 47<br>Controls (CO): 15 | CA: 18 (38)<br>CO: 5 (33)  | CA: 55 (6)<br>CO: 53 (6)                                                 | CA: 93 (28)<br>CO: 20 (5)                                                          | CA: 25.0 (5.0)<br>CO: 23.0 (3.3)       | Pedometer: Digiwalker SW-200; Yamax, Tokyo, Japan | Short Questionnaire to Assess Health Enhancing Physical Activity (SQUASH) (Wendel-Vos, 2003) |
| Bourbeau, J. 2007, Eur Respir J <sup>S11</sup>           | cohort                                   | 421                                 | 239 (57)                   | 66 (na)                                                                  | 45 (na)                                                                            | not available                          | --                                                | Non-validated Activities of Daily Living (ADL) questionnaire <sup>†</sup>                    |
| Breyer, MK. 2010, Respir Research <sup>S12</sup>         | randomized controlled trial              | 60                                  | 27 (45)                    | 60 (8)                                                                   | 46 (18)                                                                            | 26.2 (4.6)                             | Accelerometer: DynaPort Activity Monitor;         | --                                                                                           |

| Reference                                                       | Study design                   | Study group characteristics |                            |                          |                                                          |                                        | Measure of physical activity                                                                    |                                                                              |
|-----------------------------------------------------------------|--------------------------------|-----------------------------|----------------------------|--------------------------|----------------------------------------------------------|----------------------------------------|-------------------------------------------------------------------------------------------------|------------------------------------------------------------------------------|
|                                                                 |                                | n                           | Sex (male),<br>n (%)       | Age (yr),<br>mean (SD)   | FEV <sub>1</sub> (%pred),<br>mean (SD)                   | BMI (kg/m <sup>2</sup> ),<br>mean (SD) | Direct method                                                                                   | Indirect method                                                              |
|                                                                 |                                |                             |                            |                          |                                                          |                                        | McRoberts BV,<br>The Hague, The<br>Netherlands                                                  |                                                                              |
| Chao, PW. 2011,<br>COPD <sup>S13</sup>                          | cross-sectional                | 21                          | 10 (48)                    | 57 (9)                   | not available                                            | 28 (6)                                 | --                                                                                              | Historical<br>Physical Activity<br>Questionnaire<br>(HPAQ)<br>(DuBose, 2007) |
| Chen, Y. 2006,<br>Western J Nurs<br>Research <sup>S14</sup>     | cohort                         | 145                         | 106 (73)                   | 72 (10)                  | 49 (18)                                                  | not available                          | --                                                                                              | Pulmonary<br>Functional Status<br>Scale (PFSS)<br>(Weaver, 1998)             |
| Coronado, M.<br>2003, J<br>Cardiopulm<br>Rehab <sup>S15</sup>   | non-controlled<br>study        | 15                          | 13 (87)                    | 67 (9)                   | 54 (16)                                                  | 23.6 (4.7)                             | Accelerometer:<br>ADXL05; Analog<br>Devices,<br>Norwood, Mass,<br>USA                           | --                                                                           |
| Dal Negro, R.<br>2010, Monaldi<br>Arch Chest Dis <sup>S16</sup> | randomized<br>controlled trial | EG: 16<br>CG: 16            | EG: 14 (88)<br>CG: 11 (69) | EG: 75 (7)<br>CG: 75 (7) | not available                                            | EG: 20.2 (1.8)<br>CG: 20.2 (1.4)       | Accelerometer:<br>SenseWear<br>Armband PRO3;<br>BodyMedia,<br>Pittsburgh, PA,<br>USA            | --                                                                           |
| Dallas, MI. 2009,<br>Chron Respir<br>Dis <sup>S17</sup>         | non-controlled<br>study        | 45                          | 21 (47)                    | 69 (8)                   | 45 (18)                                                  | 27.0 (5.0)                             | Pedometer: NL-<br>200 Activity<br>Monitor; New<br>Life-styles, Inc;<br>Lee's Summit,<br>MO, USA | --                                                                           |
| Daly, C. 2011,<br>Physio Ireland <sup>S18</sup>                 | non-controlled<br>study        | 8                           | 4 (50)                     | 62 (6)                   | <i>P</i> <sub>25</sub> - <i>P</i> <sub>75</sub><br>35-70 | 23.8 (3.9)                             | Accelerometer:<br>RT3;<br>Stayhealthy,<br>Monrovia, CA,                                         | --                                                                           |

| Reference                                            | Study design                | Study group characteristics |                            |                                                    |                                        |                                                                | Measure of physical activity                                                                    |                                                          |
|------------------------------------------------------|-----------------------------|-----------------------------|----------------------------|----------------------------------------------------|----------------------------------------|----------------------------------------------------------------|-------------------------------------------------------------------------------------------------|----------------------------------------------------------|
|                                                      |                             | n                           | Sex (male),<br>n (%)       | Age (yr),<br>mean (SD)                             | FEV <sub>1</sub> (%pred),<br>mean (SD) | BMI (kg/m <sup>2</sup> ),<br>mean (SD)                         | Direct method                                                                                   | Indirect method                                          |
|                                                      |                             |                             |                            |                                                    |                                        |                                                                | USA                                                                                             |                                                          |
| de Blok, BM. 2006, Patient Educ Couns <sup>S19</sup> | randomized controlled trial | EG: 10<br>CG: 11            | EG: 5 (50)<br>CG: 4 (36)   | EG: 66 (10)<br>CG: 63 (12)                         | EG: 52 (22)<br>CG: 43 (13)             | EG: 29.3 (8.4)<br>CG: 28.2 (6.6)                               | Pedometer:<br>Yamax Digiwalker SW-200;,<br>Tokyo, Japan                                         | --                                                       |
| Effing, T. 2011, Respir Med <sup>S20</sup>           | randomized controlled trial | EG: 77<br>CG: 76            | EG: 45 (58)<br>CG: 44 (58) | EG: 63 (8)<br>CG: 64 (8)                           | EG: 50 (14)<br>CG: 51 (17)             | EG: 26.1 (5.0)<br>CG: 26.8 (4.4)                               | Pedometer<br>Yamax Digi-Walker SW-200;<br>Tokyo, Japan                                          | --                                                       |
| Egan, C. 2012, Respir Med <sup>S21</sup>             | non-controlled study        | 47                          | not available              | not available                                      | 47 (17)                                | 27.5 (6.2)                                                     | Accelerometer:<br>SenseWear Armband PRO3;<br>BodyMedia;<br>Pittsburgh, PA, USA                  | --                                                       |
| Eisner, MD. 2008, Am J Epi <sup>S22</sup>            | cross-sectional             | 1202                        | 511 (43)                   | 58 (6)                                             | 62 (23)                                | not available                                                  | --                                                                                              | Self-Reported Functional Limitation<br>(Sternfeld, 2002) |
| Eliason, G. 2011, COPD <sup>S23</sup>                | cross-sectional             | 44                          | 16 (36)                    | mild: 64 (6)<br>moderate: 64 (8)<br>severe: 63 (8) | not available                          | mild: 25.9 (5.3)<br>moderate: 28.0 (6.3)<br>severe: 26.3 (4.2) | Accelerometer:<br>Actigraph GT1M;<br>Manufacturing Technology IC,<br>Fort Walton Beach, FL, USA | --                                                       |
| Esteban, C. 2006, QJM <sup>S24</sup>                 | cohort                      | 611                         | 597 (98)                   | 67 (8)                                             | 50 (15)                                | not available                                                  | --                                                                                              | Non-validated scale <sup>‡</sup>                         |
| Esteban, C. 2010, Eur Respir J <sup>S25</sup>        | cohort                      | 391                         | not available              | 66 (9)                                             | 52 (14)                                | 27.9 (4.3)                                                     |                                                                                                 | Non-validated scale <sup>‡</sup>                         |

| Reference                                                       | Study design                | Study group characteristics |                          |                          |                                                                 |                                        | Measure of physical activity |                                                                                             |
|-----------------------------------------------------------------|-----------------------------|-----------------------------|--------------------------|--------------------------|-----------------------------------------------------------------|----------------------------------------|------------------------------|---------------------------------------------------------------------------------------------|
|                                                                 |                             | n                           | Sex (male),<br>n (%)     | Age (yr),<br>mean (SD)   | FEV <sub>1</sub> (%pred),<br>mean (SD)                          | BMI (kg/m <sup>2</sup> ),<br>mean (SD) | Direct method                | Indirect method                                                                             |
| Esteban, C. 2011, Respir Med <sup>S26</sup>                     | cohort                      | 611                         | 597 (98)                 | 67 (9)                   | 50 (15)                                                         | 27.8 (4.3)                             | --                           | Non-validated scale <sup>‡</sup>                                                            |
| Faager, G. 2004, J Rehab Med <sup>S27</sup>                     | randomized controlled trial | EG: 10<br>CG: 10            | EG: 3 (30)<br>CG: 3 (30) | EG: 72 (9)<br>CG: 70 (8) | EG: 26 (7)<br>CG: 28 (6)                                        | not available                          | --                           | Stanford Health Assessment Questionnaire (HAQ) (Ek Dahl, 1988)                              |
| Faulkner, J. 2010, Prim Care Respir J <sup>S28</sup>            | randomized controlled trial | 20                          | not available            | not available            | EG: 65 (12)<br>CG: 67 (12)                                      | not available                          | --                           | Seven day physical activity recall questionnaire (7 day physical activity) (Blair, 1984)    |
| Garcia-Aymerich, J. 2003, Thorax <sup>S29</sup>                 | cohort                      | 340                         | 313 (92)                 | 69 (9)                   | 36 (16)                                                         | 26.0 (5.0)                             | --                           | Adaptation from the Minnesota Leisure Time Physical (Elosua, 1994)                          |
| Garcia-Aymerich, J. 2004, Med Scien Sports Exerc <sup>S30</sup> | cross-sectional             | 346                         | 317 (92)                 | 69 (9)                   | 35 (16)                                                         | 26.0 (5.0)                             | --                           | Simplification of the Minnesota Leisure Time Physical Activity Questionnaire (Elosua, 1994) |
| Garcia-Aymerich, J. 2006, Thorax <sup>S31</sup>                 | cohort                      | 2386                        | 1286 (54)                | 60 (11)                  | n (%)<br>mild:<br>833 (35)<br>moderate:<br>1095 (46)<br>severe: | 24.9 (4.2)                             | --                           | Validated questionnaire (Saltin and Grimby, 1968)                                           |

| Reference                                                     | Study design                    | Study group characteristics |                              |                          |                                                                                                      |                                        | Measure of physical activity                       |                                                       |
|---------------------------------------------------------------|---------------------------------|-----------------------------|------------------------------|--------------------------|------------------------------------------------------------------------------------------------------|----------------------------------------|----------------------------------------------------|-------------------------------------------------------|
|                                                               |                                 | n                           | Sex (male),<br>n (%)         | Age (yr),<br>mean (SD)   | FEV <sub>1</sub> (%pred),<br>mean (SD)                                                               | BMI (kg/m <sup>2</sup> ),<br>mean (SD) | Direct method                                      | Indirect method                                       |
|                                                               |                                 |                             |                              |                          | 354 (15)<br>very severe:<br>94 (4)                                                                   |                                        |                                                    |                                                       |
| Garcia-Aymerich, J. 2008, Ann Epidemiol <sup>S32</sup>        | cohort                          | 2226                        | 1161 (52)                    | 54 (10)                  | n (%)<br>mild:<br>966 (44)<br>moderate:<br>1027 (47)<br>severe:<br>190 (9)<br>very severe:<br>27 (1) | not available                          | --                                                 | Validated questionnaire (Saltin and Grimby, 1968)     |
| Garcia-Aymerich, J. 2009, Chest <sup>S33</sup>                | cross-sectional                 | 341                         | 317 (93)                     | 68 (9)                   | 52 (16)                                                                                              | 28.2 (4.7)                             | --                                                 | YALE physical activity questionnaire (De Abajo, 2001) |
| Garcia-Rio, F. 2009, Am J Respir Crit Care Med <sup>S34</sup> | cross-sectional                 | 110                         | 104 (95)                     | 63 (8)                   | 47 (14)                                                                                              | 27.5 (3.7)                             | Accelerometer: RT3; Stayhealthy, Monrovia, CA, USA | --                                                    |
| Garcia-Rio, F. 2012, Chest <sup>S35</sup>                     | cohort                          | 173                         | 157 (91)                     | 64 (8)                   | 49 (14)                                                                                              | 27.4 (3.5)                             | Accelerometer: RT3; Stayhealthy, Monrovia, CA, USA | --                                                    |
| Goto, Y. 2004, Respiriology <sup>S36</sup>                    | non-randomised controlled study | EG: 18<br>CG: 12            | EG: 18 (100)<br>CG: 11 (92%) | EG: 65 (6)<br>CG: 67 (8) | EG: 29 (na)<br>CG: 78 (na)                                                                           | EG: na<br>CG: na                       | --                                                 | Validated questionnaire <sup>\$</sup>                 |
| Hartman, JE. 2013, Arch Phys                                  | cross-sectional                 | 113                         | 76 (67)                      | 65 (9)                   | 52 (14-119)*                                                                                         | not available                          | Accelerometer: DynaPort Activity                   | --                                                    |

| Reference                                                                   | Study design            | Study group characteristics |                      |                        |                                        |                                        | Measure of physical activity                                                                                                                                                     |                                                                              |
|-----------------------------------------------------------------------------|-------------------------|-----------------------------|----------------------|------------------------|----------------------------------------|----------------------------------------|----------------------------------------------------------------------------------------------------------------------------------------------------------------------------------|------------------------------------------------------------------------------|
|                                                                             |                         | n                           | Sex (male),<br>n (%) | Age (yr),<br>mean (SD) | FEV <sub>1</sub> (%pred),<br>mean (SD) | BMI (kg/m <sup>2</sup> ),<br>mean (SD) | Direct method                                                                                                                                                                    | Indirect method                                                              |
| Med Rehab <sup>S37</sup>                                                    |                         |                             |                      |                        |                                        |                                        | Monitor;<br>McRoberts BV,<br>The Hague, The<br>Netherlands                                                                                                                       |                                                                              |
| Hataji, O. 2013,<br>Int J Chron<br>Obstruct Pulmon<br>Dis <sup>S38</sup>    | non-controlled<br>study | 23                          | 21 (91)              | 70 (2)                 | 65 (4)                                 | 21.6 (0.7)                             | Accelerometer:<br>Lifecorder;<br>Suzuken<br>Corporation,<br>Nagoya, Japan                                                                                                        | --                                                                           |
| Inal-Ince, D.<br>2005, Saudi Med<br>J <sup>S39</sup>                        | cross-sectional         | 30                          | 30 (100)             | 62 (10)                | 37 (12)                                | 23.9 (4.2)                             | --                                                                                                                                                                               | Activities of Daily<br>Living<br>Questionnaire<br>(ADL-Q)<br>(Kennedy, 1994) |
| Jehn, M. 2012,<br>Med Sci Sports<br>Exerc <sup>S40</sup>                    | cross-sectional         | 107                         | 76 (71)              | 65 (11)                | 43 (15)                                | 26.2 (5.8)                             | Accelerometer:<br>Aipermon GmbH,<br>Munich,<br>Germany                                                                                                                           | --                                                                           |
| Katajisto, M.<br>2012, Int J Chron<br>Obstruct Pulmon<br>Dis <sup>S41</sup> | cross-sectional         | 719                         | 419 (60)             | 63 (7)                 | 60 (19)                                | 26.6 (5.2)                             | --                                                                                                                                                                               | COPEX<br>questionnaire <sup>ll</sup>                                         |
| Lahaije, A. 2013,<br>Respir Med <sup>S42</sup>                              | cross-sectional         | 57                          | 35 (61)              | 64 (7)                 | 64 (24)                                | 27 (5)                                 | Accelerometer:<br>Actometer; Dep.<br>of Electronics<br>and Instrumental<br>Services of the<br>Psychological<br>Laboratory of the<br>University of<br>Nijmegen, The<br>Netherlads | --                                                                           |



| Reference                                                 | Study design         | Study group characteristics |                      |                        |                                        |                                                                 | Measure of physical activity                                                                                                                   |                                                                    |
|-----------------------------------------------------------|----------------------|-----------------------------|----------------------|------------------------|----------------------------------------|-----------------------------------------------------------------|------------------------------------------------------------------------------------------------------------------------------------------------|--------------------------------------------------------------------|
|                                                           |                      | n                           | Sex (male),<br>n (%) | Age (yr),<br>mean (SD) | FEV <sub>1</sub> (%pred),<br>mean (SD) | BMI (kg/m <sup>2</sup> ),<br>mean (SD)                          | Direct method                                                                                                                                  | Indirect method                                                    |
| Lee, H. 2011, Geriatr Nurs <sup>S43</sup>                 | cross-sectional      | 131                         | 117 (89)             | 66 (na)                | 60 (na)                                | n (%)<br><18.5: 16 (12)<br>18.5 to <25: 86 (66)<br>≥25: 29 (22) | --                                                                                                                                             | International Physical Activity Questionnaire (IPAQ) (Craig, 2003) |
| Lemmens, KMM. 2008, Patient Educ Couns <sup>S44</sup>     | cross-sectional      | 278                         | 156 (56)             | 63 (11)                | 78 (20)                                | 27.5 (4.7)                                                      | --                                                                                                                                             | Validated questionnaire <sup>¶</sup>                               |
| Lores, V. 2006, Arch Bronconeumol <sup>S45</sup>          | cross-sectional      | 23                          | 20 (87)              | 62 (7)                 | 45 (13)                                | 27.7 (3.6)                                                      | Accelerometer: RT3; Stayhealthy, Monrovia, CA, USA                                                                                             | --                                                                 |
| Mador, MJ. 2011, J Cardiopulmon Rehab Prev <sup>S46</sup> | non-controlled study | 24                          | not available        | 72 (8)                 | 44 (18)                                | 30.3 (4.5)                                                      | Accelerometer: RT3; Stayhealthy, Monrovia, CA, USA                                                                                             | --                                                                 |
| Miravittles, M. 2011, Respir Med <sup>S47</sup>           | cohort               | 346                         | 315 (91)             | 69 (10)                | 47 (17)                                | 27.4 (4.7)                                                      | --                                                                                                                                             | Non-validated scale <sup>‡</sup>                                   |
| Monteiro, F. 2012, Lung <sup>S48</sup>                    | cross-sectional      | 74                          | 45 (61)              | 65 (9)                 | 40 (15)                                | 27 (6)                                                          | Accelerometer: DynaPort Activity Monitor; McRoberts BV, The Hague, The Netherlands; and SenseWear Armband PRO3; BodyMedia, Pittsburgh, PA, USA | --                                                                 |

| Reference                                                      | Study design                | Study group characteristics |                            |                                                                                                |                                        |                                        | Measure of physical activity                                                            |                                                       |
|----------------------------------------------------------------|-----------------------------|-----------------------------|----------------------------|------------------------------------------------------------------------------------------------|----------------------------------------|----------------------------------------|-----------------------------------------------------------------------------------------|-------------------------------------------------------|
|                                                                |                             | n                           | Sex (male),<br>n (%)       | Age (yr),<br>mean (SD)                                                                         | FEV <sub>1</sub> (%pred),<br>mean (SD) | BMI (kg/m <sup>2</sup> ),<br>mean (SD) | Direct method                                                                           | Indirect method                                       |
| Moy, M. 2009, J Rehab Res Develop <sup>S49</sup>               | cross-sectional             | 17                          | 17 (100)                   | 73 (8)                                                                                         | 57 (22)                                | 28.0 (4.0)                             | Accelerometer: Actiped; FitLinixx, CT, USA                                              | Physical activity checklist**                         |
| Moy, M. 2013, PLoS ONE <sup>S50</sup>                          | cohort                      | 169                         | 167 (99)                   | 71 (8)                                                                                         | 54 (20)                                | 29.0 (6.0)                             | Accelerometer: Stepwatch® 3 Activity Monitor; OrthoCare Innovations, Washington DC, USA | --                                                    |
| Nguyen, HQ. 2009, Int J Chron Obstruct Pulm Dis <sup>S51</sup> | randomized controlled trial | EG: 9<br>CG: 8              | EG: 3 (33)<br>CG: 3 (37)   | EG: 72 (9f)<br>CG: 64 (12)                                                                     | EG: 47 (19)<br>CG: 34 (15)             | EG: 26.3 (5.5)<br>CG: 25.0 (7.8)       | Accelerometer: Stepwatch® 3 Activity Monitor; OrthoCare Innovations, Washington DC, USA | --                                                    |
| Nguyen, HQ. 2013, Chest <sup>S52</sup>                         | cross-sectional             | 148                         | 115 (78)                   | 67 (9)                                                                                         | 42 (16)                                | not available                          | Accelerometer: Stepwatch® 3 Activity Monitor; OrthoCare Innovations, Washington DC, USA | --                                                    |
| Nield, M. 2005, J Cardiopulm Rehab <sup>S53</sup>              | non-controlled study        | 48                          | 14 (29)                    | 66 (8)                                                                                         | 35 (15)                                | not available                          | --                                                                                      | Human Activity Profile (HAP) (Fix & Daughton, 1988)   |
| Okubadejo, AA. 1997, Eur Respir J <sup>S54</sup>               | case-control                | CA: 23<br>CO: 19            | CA: 14 (61)<br>CO: 14 (74) | median ( <i>P</i> <sub>25</sub> - <i>P</i> <sub>75</sub> )<br>CA: 71 (60-84)<br>CO: 72 (62-75) | CA: 28 (12)<br>CO: 35 (11)             | CA: na<br>CO: na                       | --                                                                                      | Nottingham Extended Activities of Daily Living (EADL) |

| Reference                                                 | Study design                             | Study group characteristics |                            |                                                                          |                                                                          |                                                                          | Measure of physical activity                                                       |                                                                                |
|-----------------------------------------------------------|------------------------------------------|-----------------------------|----------------------------|--------------------------------------------------------------------------|--------------------------------------------------------------------------|--------------------------------------------------------------------------|------------------------------------------------------------------------------------|--------------------------------------------------------------------------------|
|                                                           |                                          | n                           | Sex (male),<br>n (%)       | Age (yr),<br>mean (SD)                                                   | FEV <sub>1</sub> (%pred),<br>mean (SD)                                   | BMI (kg/m <sup>2</sup> ),<br>mean (SD)                                   | Direct method                                                                      | Indirect method                                                                |
|                                                           |                                          |                             |                            |                                                                          |                                                                          |                                                                          |                                                                                    | scale (Lincoln, 1992)                                                          |
| Palop Cervera, M. 2010, Rev Clínica Esp <sup>S55</sup>    | case-control                             | CA: 44<br>CO: 81            | CA: 39 (89)<br>CO: 76 (94) | CA: 75 (9)<br>CO: 72 (11)                                                | CA: 40 (17)<br>CO: 49 (16)                                               | CA: na<br>CO: na                                                         | --                                                                                 | <i>ad hoc</i> questionnaire <sup>††</sup>                                      |
| Pitta, F. 2006, Chest <sup>S56</sup>                      | cohort                                   | 17                          | 16 (94)                    | 69 (9)                                                                   | 29 (20-48)*                                                              | 24.0 (5.0)                                                               | Accelerometer: DynaPort Activity Monitor; McRoberts BV, The Hague, The Netherlands | --                                                                             |
| Pitta, F. 2006, J Bras Pneumol <sup>S57</sup>             | cross-sectional                          | 23                          | 16 (70)                    | median ( <i>P</i> <sub>25</sub> - <i>P</i> <sub>75</sub> )<br>61 (59-69) | median ( <i>P</i> <sub>25</sub> - <i>P</i> <sub>75</sub> )<br>39 (34-53) | median ( <i>P</i> <sub>25</sub> - <i>P</i> <sub>75</sub> )<br>24 (21-27) | Accelerometer: DynaPort Activity Monitor; McRoberts BV, The Hague, The Netherlands | Pulmonary Functional Status and Dyspnea Questionnaire (PFSDQ-M) (Lareau, 1994) |
| Pitta, F. 2008, Respir Med <sup>S58</sup>                 | cross-sectional                          | 40                          | 21 (53)                    | 68 (7)                                                                   | 41 (14)                                                                  | 24.0 (6.0)                                                               | Accelerometer: SenseWear Armband PRO3; BodyMedia; Pittsburgh, PA, USA              | --                                                                             |
| Pitta, F. 2009, Respir Med <sup>S59</sup>                 | cross-sectional                          | G1: 40<br>G2: 40            | G1: 21 (53)<br>G2: 18 (45) | G1: 63 (7)<br>G2: 66 (8)                                                 | G1: 48 (17)<br>G2: 46 (17)                                               | G1: 26 (4)<br>G2: 26 (6)                                                 | Accelerometer: DynaPort Activity Monitor; McRoberts BV, The Hague, The Netherlands | --                                                                             |
| Pomidori, L. 2012, J Cardiopulm Rehab Prev <sup>S60</sup> | randomized non-controlled parallel study | G1: 18<br>G2: 18            | G1: 13 (72)<br>G2: 14 (78) | G1: 70 (9)<br>G2: 74 (7)                                                 | G1: 48 (13)<br>G2: 49 (12)                                               | G1: 27 (5)<br>G2: 29 (4)                                                 | Accelerometer: SenseWear Armband PRO3; BodyMedia,                                  | --                                                                             |

| Reference                                         | Study design                             | Study group characteristics |                            |                                                                                   |                                                                                   |                                                                                             | Measure of physical activity                                                                                                               |                                                                     |
|---------------------------------------------------|------------------------------------------|-----------------------------|----------------------------|-----------------------------------------------------------------------------------|-----------------------------------------------------------------------------------|---------------------------------------------------------------------------------------------|--------------------------------------------------------------------------------------------------------------------------------------------|---------------------------------------------------------------------|
|                                                   |                                          | n                           | Sex (male),<br>n (%)       | Age (yr),<br>mean (SD)                                                            | FEV <sub>1</sub> (%pred),<br>mean (SD)                                            | BMI (kg/m <sup>2</sup> ),<br>mean (SD)                                                      | Direct method                                                                                                                              | Indirect method                                                     |
|                                                   |                                          |                             |                            |                                                                                   |                                                                                   |                                                                                             | Pittsburgh, PA, USA                                                                                                                        |                                                                     |
| Probst, VS. 2011, Respir Care <sup>S61</sup>      | randomized non-controlled parallel study | G1: 20<br>G2: 20            | G1: 11 (55)<br>G2: 10 (50) | G1: 65 (10)<br>G2: 67 (7)                                                         | G1: 39 (14)<br>G2: 40 (13)                                                        | G1: 26 (15)<br>G2: 27 (6)                                                                   | Accelerometer: DynaPort Activity Monitor; McRoberts BV, The Hague, The Netherlands; and SenseWear Armband PRO3; BodyMedia, Pittsburgh, USA | --                                                                  |
| Roig, M. 2011, Respir Med <sup>S62</sup>          | cohort                                   | G1: 69<br>G2: 32            | G1: 43 (62)<br>G2: 13 (68) | <i>median (P<sub>25</sub>-P<sub>75</sub>)</i><br>G1: 72 (70-75)<br>G2: 76 (72-79) | <i>median (P<sub>25</sub>-P<sub>75</sub>)</i><br>G1: 43 (37-50)<br>G2: 44 (36-51) | <i>median (P<sub>25</sub>-P<sub>75</sub>)</i><br>G1: 24.9 (23.3-26.5)<br>G2: 27.9 (25-30.8) | --                                                                                                                                         | Physical Activity Scale for the Elderly (PASE) (Washburn, 1993)     |
| Sandland, C.J. 2008, Chest <sup>S63</sup>         | randomized controlled trial              | EG: 10<br>CG: 10            | EG: 6 (60)<br>CG: 8 (80)   | EG: 71 (4)<br>CG: 76 (8)                                                          | EG: 43 (16)<br>CG: 44 (29)                                                        | EG: 28.2 (5.4)<br>CG: 26.3 (5.5)                                                            | Accelerometer: Gaehwiler Z80 – 32k V1 Int; Gaehwiler Electronics, Hombrechtikon, Switzerland                                               | --                                                                  |
| Schou, L. 2013, J Telemed Telecare <sup>S64</sup> | randomized controlled trial              | EG: 22<br>CG: 22            | EG: 10 (45)<br>CG: 8 (34)  | EG: 68 (12)<br>CG: 73 (10)                                                        | EG: 39 (20)<br>CG: 44 (15)                                                        | EG: na<br>CG: na                                                                            | --                                                                                                                                         | Lawton Instrumental Activities of Daily Living Scale (Lawton, 1969) |
| Sewell, L. 2005, Chest <sup>S65</sup>             | randomized non-controlled parallel study | G1: 90<br>G2: 90            | G1: 60 (67)<br>G2: 51 (57) | G1: 69 (9)<br>G2: 67 (8)                                                          | G1: na<br>G2: na                                                                  | G1: na<br>G2: na                                                                            | Accelerometer: Gaehwiler Z80 – 32k V1 Int; Gaehwiler                                                                                       | Canadian Occupational Performance Measure (COPM) (Law,              |

| Reference                                                     | Study design                                           | Study group characteristics                    |                                                                  |                                                                                                                     |                                                           |                                                                       | Measure of physical activity                                                                                   |                                                                                                                            |
|---------------------------------------------------------------|--------------------------------------------------------|------------------------------------------------|------------------------------------------------------------------|---------------------------------------------------------------------------------------------------------------------|-----------------------------------------------------------|-----------------------------------------------------------------------|----------------------------------------------------------------------------------------------------------------|----------------------------------------------------------------------------------------------------------------------------|
|                                                               |                                                        | n                                              | Sex (male),<br>n (%)                                             | Age (yr),<br>mean (SD)                                                                                              | FEV <sub>1</sub> (%pred),<br>mean (SD)                    | BMI (kg/m <sup>2</sup> ),<br>mean (SD)                                | Direct method                                                                                                  | Indirect method                                                                                                            |
|                                                               |                                                        |                                                |                                                                  |                                                                                                                     |                                                           |                                                                       | Electronics,<br>Hombrechtikon,<br>Switzerland                                                                  | 1998)                                                                                                                      |
| Sewell, L. 2010, J<br>Cardiopulm<br>Rehab Prev <sup>S66</sup> | non-controlled<br>study                                | 95                                             | 56 (59)                                                          | 66 (9)                                                                                                              | not available                                             | not available                                                         | Accelerometer:<br>Gaehwiler Z80 –<br>32k V1 Int;<br>Gaehwiler<br>Electronics,<br>Hombrechtikon,<br>Switzerland | --                                                                                                                         |
| Silva, DR. 2011,<br>Respir Care <sup>S67</sup>                | cross-sectional                                        | 95                                             | 62 (65)                                                          | 67 (8)                                                                                                              | 41 (16)                                                   | 25.8 (4.7)                                                            | --                                                                                                             | International<br>Physical Activity<br>Questionnaire<br>(IPAQ) (Craig,<br>2003)                                             |
| Skumlien, S.<br>2006, Chron<br>Respir Dis <sup>S68</sup>      | cross-sectional                                        | G1: 65<br>G2: 45                               | G1: 65 (100)<br>G2: 45 (100)                                     | G1: 62 (10)<br>G2: 60 (6)                                                                                           | G1: 49 (16)<br>G2: 46 (16)                                | G1: 25.6 (4.7)<br>G2: 23.9 (5.2)                                      | --                                                                                                             | Pulmonary<br>Functional Status<br>and Dyspnea<br>Questionnaire<br>(PFSDQ)<br>(Lareau, 1994)                                |
| Skumlien, S.<br>2008, Respir<br>Med <sup>S69</sup>            | non-<br>randomized<br>non-controlled<br>parallel study | G1: 20<br>G2: 20                               | G1: 11 (55)<br>G2: 11 (55)                                       | G1: 62 (7)<br>G2: 63 (9)                                                                                            | G1: 48 (17)<br>G2: 50 (13)                                | G1: 23 (9)<br>G2: 26 (8)                                              | --                                                                                                             | Hyrin Physical<br>Activity<br>Questionnaire<br>(HPAQ)<br>(Anderssen,<br>2000); and Glittre<br>ADL-test<br>(Skumlien, 2005) |
| Takigawa, N.<br>2007, Respir<br>Med <sup>S70</sup>            | non-controlled<br>study                                | stage II: 21<br>stage III: 79<br>stage IV: 125 | stage II: 15 (71)<br>stage III: 68 (86)<br>stage IV: 118<br>(94) | median ( <i>P</i> <sub>25</sub> - <i>P</i> <sub>75</sub> )<br>stage II: 72 (63-<br>81)<br>stage III: 69 (54-<br>84) | stage II: 60 (7)<br>stage III: 38 (6)<br>stage IV: 23 (5) | stage II: 19.1<br>(2.6)<br>stage III: 19.3<br>(3.1)<br>stage IV: 18.5 | --                                                                                                             | Non-validated<br>scale <sup>††</sup>                                                                                       |

| Reference                                             | Study design                | Study group characteristics          |                                                          |                                                      |                                        |                                        | Measure of physical activity                                          |                                            |
|-------------------------------------------------------|-----------------------------|--------------------------------------|----------------------------------------------------------|------------------------------------------------------|----------------------------------------|----------------------------------------|-----------------------------------------------------------------------|--------------------------------------------|
|                                                       |                             | n                                    | Sex (male),<br>n (%)                                     | Age (yr),<br>mean (SD)                               | FEV <sub>1</sub> (%pred),<br>mean (SD) | BMI (kg/m <sup>2</sup> ),<br>mean (SD) | Direct method                                                         | Indirect method                            |
|                                                       |                             |                                      |                                                          | stage IV: 67 (45-79)                                 |                                        | (3.2)                                  |                                                                       |                                            |
| Troosters, T. 2010, Respir Med <sup>S71</sup>         | cross-sectional             | 70                                   | 58 (82)                                                  | 66 (9)                                               | 54 (23)                                | not available                          | Accelerometer: SenseWear Armband PRO3; BodyMedia; Pittsburgh, PA, USA | --                                         |
| Tsara, V. 2008, Respir Care <sup>S72</sup>            | case-control                | CA: 85<br>CO: 48                     | CA: na<br>CO: na                                         | CA: 71 (8)<br>CO: 64 (11)                            | CA: 38 (16)<br>CO: 57 (16)             | CA: 28.6 (6.7)<br>CO: 28.5 (6.1)       | --                                                                    | Non-validated questionnaire <sup>SS</sup>  |
| Van Gestel, AJ. 2012, COPD <sup>S73</sup>             | cross-sectional             | 154                                  | 67 (44%)                                                 | 63 (11)                                              | 43 (19)                                | 24.9 (6.1)                             | Accelerometer: SenseWear Armband PRO3; BodyMedia, Pittsburgh, PA, USA | --                                         |
| Van Remoortel, H. 2013, Thorax <sup>S74</sup>         | cross-sectional             | 59                                   | 44 (75)                                                  | 63 (6)                                               | 85 (17)                                | 26.9 (4.2)                             | Accelerometer: SenseWear Armband PRO3; BodyMedia, Pittsburgh, PA, USA |                                            |
| Vergeret, J. 1989, Eur Respir J <sup>S75</sup>        | cohort                      | G1: 75<br>G2: 84<br>G3: 51<br>G4: 33 | G1: 63 (84)<br>G2: 76 (90)<br>G3: 45 (88)<br>G4: 31 (94) | G1: 63 (7)<br>G2: 61 (8)<br>G3: 61 (8)<br>G4: 62 (9) | G1: na<br>G2: na<br>G3: na<br>G4: na   | G1: na<br>G2: na<br>G3: na<br>G4: na   | --                                                                    | Non-validated questionnaire <sup>III</sup> |
| Waatevik, M. 2012, COPD <sup>S76</sup>                | cross-sectional             | 370                                  | 223 (60)                                                 | 63 (7)                                               | 50 (14)                                | not available                          | --                                                                    | Validated question <sup>II</sup>           |
| Wakabayashi, R. 2011, Geriatr Gerontol <sup>S77</sup> | randomized controlled trial | 102                                  | 88 (86)                                                  | 72 (8)                                               | 60 (21)                                | 21.8 (2.8)                             | --                                                                    | Lawton Instrumental Activities of Daily    |

| Reference                                               | Study design            | Study group characteristics                                  |                                                                                  |                                                                              |                                                                               |                                                                      | Measure of physical activity                                                                                                                        |                                                                                            |
|---------------------------------------------------------|-------------------------|--------------------------------------------------------------|----------------------------------------------------------------------------------|------------------------------------------------------------------------------|-------------------------------------------------------------------------------|----------------------------------------------------------------------|-----------------------------------------------------------------------------------------------------------------------------------------------------|--------------------------------------------------------------------------------------------|
|                                                         |                         | n                                                            | Sex (male),<br>n (%)                                                             | Age (yr),<br>mean (SD)                                                       | FEV <sub>1</sub> (%pred),<br>mean (SD)                                        | BMI (kg/m <sup>2</sup> ),<br>mean (SD)                               | Direct method                                                                                                                                       | Indirect method                                                                            |
|                                                         |                         |                                                              |                                                                                  |                                                                              |                                                                               |                                                                      |                                                                                                                                                     | Living Scale<br>(Lawton, 1969)                                                             |
| Wakabayashi, R. 2011, J Am Geriatr Soc <sup>S78</sup>   | cross-sectional         | 389                                                          | 315 (81)                                                                         | 73 (8)                                                                       | 58 (26)                                                                       | not available                                                        | --                                                                                                                                                  | Lawton<br>Instrumental<br>Activities of Daily<br>Living Scale<br>(Lawton, 1969)            |
| Walker, PP. 2008, Thorax <sup>S79</sup>                 | non-controlled<br>study | 23                                                           | 12 (52)                                                                          | 66 (9)                                                                       | 36 (12)                                                                       | not available                                                        | Accelerometer:<br>Actiwatch;<br>Neurotechnology<br>Cambridge, UK;<br>and Dynaport<br>Activity Monitor;<br>McRoberts BV,<br>Den Haag,<br>Netherlands | Nottingham<br>Extended<br>Activities of Daily<br>Living (EADL)<br>scale (Lincoln,<br>1992) |
| Waschki, B. 2011, Chest <sup>S80</sup>                  | cohort                  | G1: 143<br>G2: 26                                            | G1: 107 (75)<br>G2: 20 (77)                                                      | G1: 64 (7)<br>G2: 66 (6)                                                     | G1: 59 (21)<br>G2: 41 (22)                                                    | G1: 26.7 (5.1)<br>G2: 23.5 (4.3)                                     | Accelerometer:<br>SenseWear<br>Armband PRO3;<br>BodyMedia,<br>Pittsburgh, PA,<br>USA                                                                | --                                                                                         |
| Watz, H. 2008, Am J Respir Crit Care Med <sup>S81</sup> | cross-sectional         | 170                                                          | 128 (75)                                                                         | 64 (7)                                                                       | 56 (22)                                                                       | not available                                                        | Accelerometer:<br>SenseWear<br>Armband PRO3;<br>BodyMedia,<br>Pittsburgh, PA,<br>USA                                                                | --                                                                                         |
| Watz, H. 2009, Chest <sup>S82</sup>                     | cross-sectional         | stage I: 34<br>stage II: 57<br>stage III: 43<br>stage IV: 36 | stage I: 25 (74)<br>stage II: 41 (72)<br>stage III: 35 (81)<br>stage IV: 27 (75) | stage I: 66 (6)<br>stage II: 63 (7)<br>stage III: 63 (7)<br>stage IV: 64 (6) | stage I: 90 (9)<br>stage II: 63 (8)<br>stage III: 41 (5)<br>stage IV: 33 (11) | stage I: 27.0<br>(4.2)<br>stage II: 27.8<br>(5.3)<br>stage III: 25.0 | Accelerometer:<br>SenseWear<br>Armband PRO3;<br>BodyMedia,<br>Pittsburgh, PA,                                                                       | --                                                                                         |

| Reference                                     | Study design                   | Study group characteristics                                  |                                                                                  |                                                                                                |                                                                               |                                                                                                          | Measure of physical activity                                                                                                                            |                                                                                       |
|-----------------------------------------------|--------------------------------|--------------------------------------------------------------|----------------------------------------------------------------------------------|------------------------------------------------------------------------------------------------|-------------------------------------------------------------------------------|----------------------------------------------------------------------------------------------------------|---------------------------------------------------------------------------------------------------------------------------------------------------------|---------------------------------------------------------------------------------------|
|                                               |                                | n                                                            | Sex (male),<br>n (%)                                                             | Age (yr),<br>mean (SD)                                                                         | FEV <sub>1</sub> (%pred),<br>mean (SD)                                        | BMI (kg/m <sup>2</sup> ),<br>mean (SD)                                                                   | Direct method                                                                                                                                           | Indirect method                                                                       |
|                                               |                                |                                                              |                                                                                  |                                                                                                |                                                                               | (5.0)<br>stage IV: 24.6<br>(5.3)                                                                         | USA                                                                                                                                                     |                                                                                       |
| Watz, H. 2009,<br>Eur Respir J <sup>S83</sup> | cross-sectional                | stage I: 34<br>stage II: 52<br>stage III: 41<br>stage IV: 36 | stage I: 25 (74)<br>stage II: 37 (71)<br>stage III: 33 (80)<br>stage IV: 27 (75) | stage I: 66 (6)<br>stage II: 64 (6)<br>stage III: 63 (7)<br>stage IV: 64 (6)                   | stage I: 90 (9)<br>stage II: 63 (8)<br>stage III: 41 (5)<br>stage IV: 33 (11) | stage I: 27.0<br>(4.2)<br>stage II: 27.3<br>(5.0)<br>stage III: 25.1<br>(5.1)<br>stage IV: 24.6<br>(5.3) | Accelerometer:<br>SenseWear<br>Armband PRO3;<br>BodyMedia,<br>Pittsburgh, PA,<br>USA                                                                    | --                                                                                    |
| Weekes, CE.<br>2009, Thorax <sup>S84</sup>    | randomised<br>controlled trial | EG: 31<br>CG: 28                                             | EG: 16 (52)<br>CG: 14 (50)                                                       | median ( <i>P</i> <sub>25</sub> - <i>P</i> <sub>75</sub> )<br>EG: 69 (48-89)<br>CG: 69 (46-85) | EG: 31 (13)<br>CG: 33 (15)                                                    | EG: 19.9 (1.4)<br>CG: 19.5 (1.9)                                                                         | --                                                                                                                                                      | Townsend score<br>(Bond, 1982)                                                        |
| Wewel, A. 2008,<br>Respir Med <sup>S85</sup>  | non-controlled<br>study        | 21                                                           | 17 (81)                                                                          | 65 (9)                                                                                         | 32 (9)                                                                        | 25.9 (4.7)                                                                                               | Pedometer:<br>Kasper & Richter<br>GmbH & Co. KG;<br>Uttenreuth,<br>Germany; and<br>accelerometer:<br>ActiTrac-Monitor;<br>Somnomedics,<br>Kist, Germany | --                                                                                    |
| Yeo, J. 2006, Age<br>Ageing <sup>S86</sup>    | cross-sectional                | 27                                                           | 16 (59)                                                                          | 76 (4)                                                                                         | n (%)<br>mild: 10 (37)<br>moderate: 12<br>(44)<br>severe: 5 (19)              | not available                                                                                            | --                                                                                                                                                      | Manchester<br>Respiratory<br>Activity of Daily<br>Living Score<br>(Yohannes,<br>2000) |

Abbreviations: EG: experimental group; CG: control group, CA: cases; CO: controls; na: not available; MRC: Medical Research Council.



\*Patients were asked how many days during the previous week they performed lower-extremity endurance exercises, such as walking or cycling, and for how many minutes each day.

<sup>†</sup>Subjects were asked “How much did your COPD affect your normal daily activities during the previous 24h?” and were required to indicate, by placing a cross on a 10 cm scale, how their COPD affected their normal daily activities.

<sup>§</sup>Scale from 0 to 3: 0, ‘doesn’t leave the house, life is limited to the bed or armchair, or to doing some domestic chores’, or ‘leaves the house, but walks less than 100 m’; 1, ‘leaves the house and walks a few hundred meters, runs errands, but walks less than 100 m’; 1, ‘leaves the house and walks a few hundred meters, runs errands, but does not walk regularly’; 2, ‘engages in physical activity in the vegetable garden’, or ‘takes walks for up to 8 km, no less than 5 days a week’; and 3, ‘takes walks regularly for >8km, no less than 5 days a week’, or ‘practices sports’.

<sup>§</sup>Seven standard items related to ADL (eating, toileting, shampooing, bathing, face washing and teeth brushing, dressing, and indoor walking) (Christiansen, 1998).

<sup>||</sup>Questions Q1A, Q1B, Q2, Q3, Q4 and Q7 from COPEX questionnaire.

<sup>¶</sup>Physical activity scale (validated instrument (Deenen, 1996 - originally from Baecke, 1982)

<sup>\*\*</sup>Physical activity checklist were based on the Pulmonary Functional Status and Dyspnea Questionnaire Activity Assessment (PFSDQ) (Lareau, 1994).

<sup>††</sup>The physical activity performed by the patients was classified in 3 categories: (1) home-bound, (2) less than 6hours out of home, or (3) more than 6 hours.

<sup>‡‡</sup>ADL was assessed using questionnaire based on velocity of motion and shortness of breath in daily activity with various grades of exertion during a list of ADL.

<sup>§§</sup>Independence in ADL was assessed with a questionnaire designed for the study including domestic and physical activities at home and outside the home.

<sup>||||</sup>Questionnaire about patient’s activity and its location.

<sup>¶¶</sup>Self-reported physical activity was recorded using the question: “How has your physical activity been in your spare time the last year?”

**Online supplement Table 3a. Determinants covered by at least 2 articles and their association with physical activity, grouped in main categories and sorted by alphabetical order.**

**Determinant: Age**

| Paper                                                         | Variable / Category | Association                                                                                                                                                                                                         |                                                                                                            |
|---------------------------------------------------------------|---------------------|---------------------------------------------------------------------------------------------------------------------------------------------------------------------------------------------------------------------|------------------------------------------------------------------------------------------------------------|
|                                                               |                     | Significant                                                                                                                                                                                                         | Non-significant                                                                                            |
| Garcia-Aymerich, J. 2004, Med Sci Sports Exerc <sup>S30</sup> | Age (years)         | Mean (SD) 71 (10) in low energy expenditure (0-53 kcal/d); 68 (8) in moderate (54-210 kcal/d); 68 (8) in high (>210 kcal/d); p=0.032<br>Adjusted OR (95% CI) of low physical activity: 1.04 (1.01 to 1.07); p=0.013 | ---                                                                                                        |
| Garcia-Aymerich, J. 2009, Chest <sup>S33</sup>                | Age (years)         | Mean (SD) 71 (8) in quartile 1 (Q1) of energy expenditure in physical activity; 69 (7) in Q2; 67 (8) in Q3; 63 (10) in Q4; p for trend<0.001                                                                        | ---                                                                                                        |
| Garcia-Rio, F. 2009, Am J Respir Crit Care Med <sup>S34</sup> | Age (years)         | ---                                                                                                                                                                                                                 | Mean (SD) 65 (6) in quartile 1 (Q1) of physical activity; 62 (8) in Q2; 62 (8) in Q3; 62 (8) in Q4; p=0.48 |
| Pitta, F. 2006, J Bras Pneumol <sup>S57</sup>                 | Age (years)         | ---                                                                                                                                                                                                                 | Median (P25-P75) 61 (58-67) in active group vs. 63 (60-70) in inactive group; p=0.406                      |
| Troosters, T. 2010, Respir Med <sup>S71</sup>                 | Age (years)         | Correlation coefficient -0.33 with number steps per day; p=0.006<br>Correlation coefficient -0.23 with time spent in activities of mild intensity; p=0.05                                                           | ---                                                                                                        |

|                                                         |             |     |                                                                                                   |
|---------------------------------------------------------|-------------|-----|---------------------------------------------------------------------------------------------------|
| Watz, H. 2008, Am J Respir Crit Care Med <sup>S81</sup> | Age (years) | --- | Unstandardized regression coefficient (95% CI) <0.001 (-0.006 to 0.007) for steps per day; p=0.91 |
|---------------------------------------------------------|-------------|-----|---------------------------------------------------------------------------------------------------|

### **Determinant: Alcohol consumption**

| Paper                                                         | Variable / Category       | Association                                                                                                                         |                                                                                                                 |
|---------------------------------------------------------------|---------------------------|-------------------------------------------------------------------------------------------------------------------------------------|-----------------------------------------------------------------------------------------------------------------|
|                                                               |                           | Significant                                                                                                                         | Non-significant                                                                                                 |
| Garcia-Aymerich, J. 2004, Med Sci Sports Exerc <sup>S30</sup> | Alcohol consumption       | N (%): 29 (26) in low energy expenditure (0-53 kcal/d); 39 (39) in moderate (54-210 kcal/d); 51 (44) in high (>210 kcal/d); p=0.015 | ---                                                                                                             |
| Garcia-Rio, F. 2009, Am J Respir Crit Care Med <sup>S34</sup> | Alcohol consumption (g/d) | ---                                                                                                                                 | Mean (SD): 21 (19) in quartile 1 (Q1) of physical activity; 21 (14) in Q2; 19 (15) in Q3; 20 (15) in Q4; p=0.93 |

### **Determinant: BODE index**

| Paper                                                         | Variable / Category | Association                                                                                                                                                                                                                                                                                                         |                                                                                                                               |
|---------------------------------------------------------------|---------------------|---------------------------------------------------------------------------------------------------------------------------------------------------------------------------------------------------------------------------------------------------------------------------------------------------------------------|-------------------------------------------------------------------------------------------------------------------------------|
|                                                               |                     | Significant                                                                                                                                                                                                                                                                                                         | Non-significant                                                                                                               |
| Garcia-Rio, F. 2009, Am J Respir Crit Care Med <sup>S34</sup> | BODE index          | Mean (SD): 5.9 (1.9) in quartile 1 (Q1) of physical activity; 4.9 (1.7) in Q2; 2.9 (1.4) in Q3; 2.3 (1.4) in Q4; p=0.001.<br><br>Mean (SD) daily physical activity (VMU): 259 (91) in quartile 1 of BODE index (0-2) vs. 200 (67) in quartile 2 (3-4); p=0.003.<br><br>Mean (SD) daily physical activity (VMU): 259 | Mean (SD) daily physical activity (VMU): 142 (51) in quartile 3 of BODE index (5-6) vs. 89 (26) in quartile 4 (7-10); p=0.09. |

|                                                         |            |                                                                                                                                                                                                                                                                                                                                                                                                                                                                                                                                                                                                    |                                                                                                                                                                                                                                                                                                                                                                                                                                                                                                                                                                               |
|---------------------------------------------------------|------------|----------------------------------------------------------------------------------------------------------------------------------------------------------------------------------------------------------------------------------------------------------------------------------------------------------------------------------------------------------------------------------------------------------------------------------------------------------------------------------------------------------------------------------------------------------------------------------------------------|-------------------------------------------------------------------------------------------------------------------------------------------------------------------------------------------------------------------------------------------------------------------------------------------------------------------------------------------------------------------------------------------------------------------------------------------------------------------------------------------------------------------------------------------------------------------------------|
|                                                         |            | <p>(91) in quartile 1 vs. 142 (51) in quartile 3 (5-6); p=0.001.</p> <p>Mean (SD) daily physical activity (VMU): 259 (91) in quartile 1 vs. 89 (26) in quartile 4 (7-10); p=0.001.</p> <p>Mean (SD) daily physical activity (VMU): 200 (67) in quartile 2 vs. 142 (51) in quartile 3; p=0.01.</p> <p>Mean (SD) daily physical activity (VMU): 200 (67) in quartile 2 vs. 89 (26) in quartile 4; p=0.001.</p>                                                                                                                                                                                       |                                                                                                                                                                                                                                                                                                                                                                                                                                                                                                                                                                               |
| Moy, ML. 2009, J Rehabil Res Dev <sup>S49</sup>         | BODE index | Unadjusted coefficient (95% CI): -0.34 (-0.58 to -0.10) for number of checklist physical activity performed; p=0.008                                                                                                                                                                                                                                                                                                                                                                                                                                                                               | ---                                                                                                                                                                                                                                                                                                                                                                                                                                                                                                                                                                           |
| Pitta, F. 2006, J Bras Pneumol <sup>S57</sup>           | BODE index | Median (P25-P75): 2.5 (1.5-3.5) in active group vs. 5 (5-8) in inactive group; 0.001                                                                                                                                                                                                                                                                                                                                                                                                                                                                                                               | ---                                                                                                                                                                                                                                                                                                                                                                                                                                                                                                                                                                           |
| Watz, H. 2008, Am J Respir Crit Care Med <sup>S81</sup> | BODE index | <p>Adjusted unstandardized regression coefficient (95% CI) BODE score quintile 4: -0.119 (-0.235 to -0.003) for physical activity level; p=0.044</p> <p>Adjusted unstandardized regression coefficient (95% CI) BODE score quintile 5: -0.282 (-0.403 to -0.160) for physical activity level; p&lt;0.001</p> <p>Adjusted unstandardized regression coefficient (95% CI) BODE score quintile 4: -2646 (-4052 to -1240) for steps per day; p&lt;0.001</p> <p>Adjusted unstandardized regression coefficient (95% CI) BODE score quintile 5: -4874 (-6346 to -3401) for steps per day; p&lt;0.001</p> | <p>Adjusted unstandardized regression coefficient (95% CI) BODE score quintile 2: -0.073 (-0.186 to 0.040) for physical activity level; p=0.21</p> <p>Adjusted unstandardized regression coefficient (95% CI) BODE score quintile 3: -0.065 (-0.181 to 0.050) for physical activity level; p=0.27</p> <p>Adjusted unstandardized regression coefficient (95% CI) BODE score quintile 2: -982 (-2352 to 388) for steps per day; p=0.16</p> <p>Adjusted unstandardized regression coefficient (95% CI) BODE score quintile 3: -1365 (-2767 to 38) for steps per day; p=0.06</p> |

|                                            |            |                                                                                                                                                                                                                                                                                                                                                                                                                                                                                                                                                                  |     |
|--------------------------------------------|------------|------------------------------------------------------------------------------------------------------------------------------------------------------------------------------------------------------------------------------------------------------------------------------------------------------------------------------------------------------------------------------------------------------------------------------------------------------------------------------------------------------------------------------------------------------------------|-----|
| Watz, H. 2009, Eur Respir J <sup>S83</sup> | BODE index | <p>Mean steps per day: 8100 in BODE score 0, 7000 in BODE score 1, 6100 in BODE score 2, 5000 in BODE score 3-4, and 2100 in BODE score 5-10; p-trend&lt;0.001</p> <p>Mean minutes &gt;3 METs: 152 in BODE score 0, 132 in BODE score 1, 135 in BODE score 2, 110 in BODE score 3-4, and 55 in BODE score 5-10; p-trend&lt;0.001</p> <p>Mean physical activity level: 1.68 in BODE score 0, 1.57 in BODE score 1, 1.50 in BODE score 2, 1.46 in BODE score 3-4, and 1.28 in BODE score 5-10; p-trend&lt;0.001</p> <p>(Note: Numbers derived from the figure)</p> | --- |
|--------------------------------------------|------------|------------------------------------------------------------------------------------------------------------------------------------------------------------------------------------------------------------------------------------------------------------------------------------------------------------------------------------------------------------------------------------------------------------------------------------------------------------------------------------------------------------------------------------------------------------------|-----|

#### **Determinant: Body Mass Index**

| Paper                                                         | Variable / Category                  | Association |                                                                                                                                      |
|---------------------------------------------------------------|--------------------------------------|-------------|--------------------------------------------------------------------------------------------------------------------------------------|
|                                                               |                                      | Significant | Non-significant                                                                                                                      |
| Garcia-Aymerich, J. 2004, Med Sci Sports Exerc <sup>S30</sup> | Body Mass Index (kg/m <sup>2</sup> ) | ---         | Mean (SD): 26 (6) in low energy expenditure (0-53 kcal/d); 26 (5) in moderate (54-210 kcal/d); 26 (5) in high (>210 kcal/d); p=0.916 |
| Garcia-Rio, F. 2009, Am J Respir Crit Care Med <sup>S34</sup> | Body Mass Index (kg/m <sup>2</sup> ) | ---         | Mean (SD): 27 (4) in quartile 1 (Q1) of physical activity; 27 (3) in Q2; 28 (4) in Q3; 28 (4) in Q4; p=0.38                          |

|                                                         |                                      |                                                                                                                                                                                                                                                                                                                                                                                                                            |                                                                                                                                                                                                                                           |
|---------------------------------------------------------|--------------------------------------|----------------------------------------------------------------------------------------------------------------------------------------------------------------------------------------------------------------------------------------------------------------------------------------------------------------------------------------------------------------------------------------------------------------------------|-------------------------------------------------------------------------------------------------------------------------------------------------------------------------------------------------------------------------------------------|
| Monteiro, F. 2012, Lung <sup>S48</sup>                  | Body Mass Index (kg/m <sup>2</sup> ) | <p>Mean (SD) time spent per day in PA at least moderate activity (min/day): 42 (43) in underweight subjects vs. 11 (12) in obese subjects; p&lt;0.05</p> <p>Mean (SD) time spent walking per day (min/day): 73 (31) in underweight subjects vs. 46 (26) in obese subjects; p&lt;0.05</p> <p>Mean (SD) time spent walking per day (min/day): 69 (34) in normal weight subjects vs. 46 (26) in obese subjects; p&lt;0.05</p> | ---                                                                                                                                                                                                                                       |
| Pitta, F. 2006, J Bras Pneumol <sup>S57</sup>           | Body Mass Index (kg/m <sup>2</sup> ) | ---                                                                                                                                                                                                                                                                                                                                                                                                                        | Median (P25-P75) 25 (22-30) in active group vs. 21 (21-26) in inactive group; p=0.281                                                                                                                                                     |
| Watz, H. 2008, Am J Respir Crit Care Med <sup>S81</sup> | Body mass index ≥ 30                 | ---                                                                                                                                                                                                                                                                                                                                                                                                                        | <p>Adjusted unstandardized regression coefficient (95% CI): 0.048 (-0.051 to 0.146) for physical activity level; p=0.34</p> <p>Adjusted unstandardized regression coefficient (95% CI): -859 (-2104 to 385) for steps per day; p=0.18</p> |

### **Determinant: Cardiovascular**

| Paper                                                         | Variable / Category | Association |                                                                                                                                     |
|---------------------------------------------------------------|---------------------|-------------|-------------------------------------------------------------------------------------------------------------------------------------|
|                                                               |                     | Significant | Non-significant                                                                                                                     |
| Garcia-Aymerich, J. 2004, Med Sci Sports Exerc <sup>S30</sup> | High blood pressure | ---         | N (%): 20 (18) in low energy expenditure (0-53 kcal/d); 16 (16) in moderate (54-210 kcal/d); 27 (23) in high (>210 kcal/d); p=0.335 |

|                                                         |                                                      |                                                                                                                                                                                                                                         |                                                                                                                                     |
|---------------------------------------------------------|------------------------------------------------------|-----------------------------------------------------------------------------------------------------------------------------------------------------------------------------------------------------------------------------------------|-------------------------------------------------------------------------------------------------------------------------------------|
|                                                         | Varicose veins                                       | ---                                                                                                                                                                                                                                     | N (%): 20 (18) in low energy expenditure (0-53 kcal/d); 18 (18) in moderate (54-210 kcal/d); 28 (24) in high (>210 kcal/d); p=0.432 |
|                                                         | Cardiac diseases                                     | ---                                                                                                                                                                                                                                     | N (%): 34 (31) in low energy expenditure (0-53 kcal/d); 34 (34) in moderate (54-210 kcal/d); 29 (25) in high (>210 kcal/d); p=0.384 |
| Watz, H. 2008, Am J Respir Crit Care Med <sup>S81</sup> | N-terminal pro-B-type natriuretic peptide (pg/ml)    | Adjusted unstandardized regression coefficient (95% CI): -0.049 (-0.093 to -0.006) for physical activity level; p=0.026<br><br>Adjusted unstandardized regression coefficient (95% CI): -677 (-1225 to -130) for steps per day; p=0.016 | ---                                                                                                                                 |
|                                                         | Deceleration time of the early transmittal flow (ms) | Adjusted unstandardized regression coefficient (95% CI): -0.001 (-0.002 to <0.000) for physical activity level; p=0.004<br><br>Adjusted unstandardized regression coefficient (95% CI): -15 (-24 to -6) for steps per day; p=0.001      | ---                                                                                                                                 |

### **Determinant: Cultural groups**

| Paper                                              | Variable / Category | Association |                                                                                                                |
|----------------------------------------------------|---------------------|-------------|----------------------------------------------------------------------------------------------------------------|
|                                                    |                     | Significant | Non-significant                                                                                                |
| Chen, Y. 2006, West J Nurs Research <sup>S14</sup> | Cultural groups     | ---         | Mean daily functioning score: 3.16 in Fukiens and Hakkas, 3.26 in Aboriginies, and 2.63 in Mainlanders; p=0.06 |

|                                               |                 |                                                                                                                                                                                                                                                                                                            |                                                                                                                                                                                                                                            |
|-----------------------------------------------|-----------------|------------------------------------------------------------------------------------------------------------------------------------------------------------------------------------------------------------------------------------------------------------------------------------------------------------|--------------------------------------------------------------------------------------------------------------------------------------------------------------------------------------------------------------------------------------------|
| Pitta, F. 2009, Respir Med <sup>S59</sup>     | Cultural groups | <p>Mean (SD) time spent walking (min/day): 40 (36) in Austrian vs. 56 (32) in Brazilian; p=0.04</p> <p>Mean (SD) movement intensity: 1.5 (0.4) in Austrian vs. 1.9 (0.4) in Brazilian; p=0.0001</p> <p>Mean(SD) time spent sitting (min/day): 388 (208) in Austrian vs. 296 (109) in Brazilian; p=0.02</p> | ---                                                                                                                                                                                                                                        |
| Troosters, T. 2010, Respir Med <sup>S71</sup> | Cultural groups | ---                                                                                                                                                                                                                                                                                                        | <p>Mean (SEM) time spent at moderate intensity (min): 27 (7) in Leuven, 21 (7) in Pittsburgh, 10 (8) in Palermo.</p> <p>Mean (SEM) time in mild physical activity (min): 93 (15) in Leuven, 62 (15) in Pittsburgh, 64 (18) in Palermo.</p> |

#### **Determinant: Day of the week**

| Paper                                            | Variable / Category                      | Association |                                                                                                                                 |
|--------------------------------------------------|------------------------------------------|-------------|---------------------------------------------------------------------------------------------------------------------------------|
|                                                  |                                          | Significant | Non-significant                                                                                                                 |
| Lores, V. 2006, Arch Bronconeumol <sup>S45</sup> | Monday to Wednesday vs. Friday to Sunday | ---         | Bland-Altman 95% CI: -29.21 to 28.81 of mean VMU between Mon-Wed and Fri-Sun vs. difference in VMU between Mon-Wed and Fri-Sun  |
|                                                  | Tuesday to Thursday vs. Friday to Sunday | ---         | Bland-Altman 95% CI: -32.13 to -28.43 of mean VMU between Tue-Thu and Fri-Sun vs. difference in VMU between Tue-Thu and Fri-Sun |
| Moy, ML. 2009, J Rehabil                         | Weekends or weekday                      | ---         | "The day of the week, categorized as either                                                                                     |



|                                            |                    |                                                                                                                                                                                               |                                                                                                                                   |
|--------------------------------------------|--------------------|-----------------------------------------------------------------------------------------------------------------------------------------------------------------------------------------------|-----------------------------------------------------------------------------------------------------------------------------------|
| Res Dev <sup>S49</sup>                     |                    |                                                                                                                                                                                               | weekend or weekday, was not significantly associated with either steps per day or daily number of checklist activities performed" |
| Watz, H. 2009, Eur Respir J <sup>S83</sup> | Sunday vs. Weekday | Mean (SD) steps per day in Sunday 6084 (4155) vs. a weekday 8081 (4144) in GOLD I; p<0.001; 6109 (3471) vs. 7674 (3619) in GOLD II; p<0.001; 3960 (2983) vs. 5410 (3995) in GOLD III; p<0.001 | Mean (SD) steps per day in Sunday 2439 (1734) vs. a weekday 2439 (1734) in GOLD IV; p=ns                                          |

### **Determinant: Dyspnoea**

| Paper                                                         | Variable / Category    | Association                                                                                                                                                                                                                                                                                       |                 |
|---------------------------------------------------------------|------------------------|---------------------------------------------------------------------------------------------------------------------------------------------------------------------------------------------------------------------------------------------------------------------------------------------------|-----------------|
|                                                               |                        | Significant                                                                                                                                                                                                                                                                                       | Non-significant |
| Bestall, JC. 1999, Thorax <sup>S8</sup>                       | MRC dyspnoea           | Median (P <sub>10</sub> -P <sub>90</sub> ) EADL score: 19 (15-21) in MRC grade 3 vs. 17 (12-20) in MRC grade 4; p<0.003; median(P <sub>10</sub> -P <sub>90</sub> ) EADL score: 17 (12-20) in MRC grade 4 vs. 13 (6-18) in MRC grade 5; p<0.0001<br><i>(Note: Numbers derived from the figure)</i> | ---             |
| Garcia-Aymerich, J. 2004, Med Sci Sports Exerc <sup>S30</sup> | Dyspnoea at rest (VAS) | Mean (SD): 5.5 (2.9) in low energy expenditure (0-53 kcal/d); 4.7 (2.7) in moderate (54-210 kcal/d); 4.6 (2.7) in high (>210 kcal/d); p=0.031                                                                                                                                                     | ---             |
| Garcia-Rio, F. 2009, Am J Respir Crit Care Med <sup>S34</sup> | MRC dyspnoea           | Mean (SD): 2.9 (1.2) in quartile 1 (Q1) of physical activity; 2.5 (1.0) in Q2; 1.8 (0.7) in Q3; 1.8 (0.8) in Q4; p=0.001                                                                                                                                                                          | ---             |
|                                                               | SGRQ symptoms          | Mean (SD): 50.8 (22.2) in quartile 1 (Q1); 44.5 (21.3) in Q2; 29.4 (16.9) in Q3; 31.6 (14.9) in                                                                                                                                                                                                   | ---             |

|                                                                 |                                              |                                                                                                                                                                                                                                                                                                                                                                                                                                                           |     |
|-----------------------------------------------------------------|----------------------------------------------|-----------------------------------------------------------------------------------------------------------------------------------------------------------------------------------------------------------------------------------------------------------------------------------------------------------------------------------------------------------------------------------------------------------------------------------------------------------|-----|
|                                                                 |                                              | Q4; p=0.001                                                                                                                                                                                                                                                                                                                                                                                                                                               |     |
| Katajisto, M. 2012, Int J Chron Obstr Respir Dis <sup>S41</sup> | MRC dyspnoea                                 | Adjusted OR (95% CI) for inactivity: 7 and 12 at dyspnoea levels 3 and 4, respectively, p<0.05                                                                                                                                                                                                                                                                                                                                                            |     |
| Nguyen, HQ. 2013, Chest <sup>S52</sup>                          | Dyspnoea (Shortness of Breath Questionnaire) | Adjusted standardized coefficient: -0.27 for total steps/day; p=0.001                                                                                                                                                                                                                                                                                                                                                                                     | --- |
| Pitta, F. 2006, J Bras Pneumol <sup>S57</sup>                   | mMRC dyspnoea (0-4)                          | Median (P <sub>25</sub> -P <sub>75</sub> ): 2 (1-2) in active group vs. 3 (3-4) in inactive group; p=0.002                                                                                                                                                                                                                                                                                                                                                | --- |
| Watz, H. 2009, Eur Respir J <sup>S83</sup>                      | mMRC dyspnoea (0-4)                          | <p>Mean steps per day: 8100 in mMRC 0, 6300 in mMRC 1, 4800 in mMRC 2, 3000 in mMRC 3, and 1800 in mMRC 4; p-trend&lt;0.001</p> <p>Mean minutes &gt;3 METs min: 165 in mMRC 0, 125 in mMRC 1, 95 in mMRC 2, 75 in mMRC 3, and 40 in mMRC 4; p-trend&lt;0.001</p> <p>Mean physical activity level: 1.65 in mMRC 0, 1.55 in mMRC 1, 1.43 in mMRC 2, 1.38 in mMRC 3, and 1.25 in mMRC 4; p-trend&lt;0.001</p> <p>(Note: Numbers derived from the figure)</p> | --- |

### **Determinant: Education**

| Paper                                                         | Variable / Category                | Association |                                                                                                                                     |
|---------------------------------------------------------------|------------------------------------|-------------|-------------------------------------------------------------------------------------------------------------------------------------|
|                                                               |                                    | Significant | Non-significant                                                                                                                     |
| Garcia-Aymerich, J. 2004, Med Sci Sports Exerc <sup>S30</sup> | Less than primary school education | ---         | N (%): 61 (55) in low energy expenditure (0-53 kcal/d); 59 (58) in moderate (54-210 kcal/d); 77 (67) in high (>210 kcal/d); p=0.165 |

|                                                               |                                    |     |                                                                                                                                              |
|---------------------------------------------------------------|------------------------------------|-----|----------------------------------------------------------------------------------------------------------------------------------------------|
| Garcia-Aymerich, J. 2009, Chest <sup>S33</sup>                | Less than primary school education | --- | N (%): 51 (60) in quartile 1 (Q1) of energy expenditure in physical activity; 45 (53) in Q2; 48 (57) in Q3; 56 (65) in Q4; p for trend=0.425 |
| Garcia-Rio, F. 2009, Am J Respir Crit Care Med <sup>S34</sup> | University studies                 | --- | Mean (SD): 4 (15) in quartile 1 (Q1) of physical activity; 2 (7) in Q2; 3 (11) in Q3; 2 (7) in Q4; p=0.87                                    |

### **Determinant: Emotional status**

| Paper                                                         | Variable / Category      | Association                                                              |                                                                                                                                     |
|---------------------------------------------------------------|--------------------------|--------------------------------------------------------------------------|-------------------------------------------------------------------------------------------------------------------------------------|
|                                                               |                          | Significant                                                              | Non-significant                                                                                                                     |
| Garcia-Aymerich, J. 2004, Med Sci Sports Exerc <sup>S30</sup> | Self-reported depression | ---                                                                      | N (%): 31 (28) in low energy expenditure (0-53 kcal/d); 28 (28) in moderate (54-210 kcal/d); 19 (17) in high (>210 kcal/d); p=0.141 |
| Nguyen, HQ. 2013, Chest <sup>S52</sup>                        | Depression (HADS-D)      | Adjusted standardized coefficient: -0.19 for total steps per day; p=0.02 | ---                                                                                                                                 |
|                                                               | Anxiety (HADS-A)         | Adjusted standardized coefficient: 0.32 for total steps per day; p<0.001 | ---                                                                                                                                 |

### **Determinant: Exacerbation**

| Paper                  | Variable / Category   | Association                                  |                 |
|------------------------|-----------------------|----------------------------------------------|-----------------|
|                        |                       | Significant                                  | Non-significant |
| Bourbeau, J. 2007, Eur | Acute Exacerbation of | Mean (SD) change in ADL score from baseline: | ---             |

|                                                               |                                                                                                          |                                                                                                                                               |                                                               |
|---------------------------------------------------------------|----------------------------------------------------------------------------------------------------------|-----------------------------------------------------------------------------------------------------------------------------------------------|---------------------------------------------------------------|
| Respir J <sup>S11</sup>                                       | COPD (AECOPD) onset                                                                                      | 8.7 (31.3); p=0.01                                                                                                                            |                                                               |
|                                                               | 4-8 days after AECOPD                                                                                    | Mean (SD) change in ADL score from baseline: 10.2 (34.2); p=0.004                                                                             | ---                                                           |
|                                                               | 11-15 days after AECOPD                                                                                  | ---                                                                                                                                           | Mean (SD) change in ADL score from baseline: 3.7 (30.1); p=ns |
| Garcia-Aymerich, J. 2004, Med Sci Sports Exerc <sup>S30</sup> | COPD admissions in the previous year                                                                     | Mean (SD): 1.9 (2.3) in low energy expenditure (0-53 kcal/d); 1.4 (2.1) in moderate (54-210 kcal/d); 1.3 (1.6) in high (>210 kcal/d); p=0.049 | ---                                                           |
| Pitta, F. 2006, Chest <sup>S56</sup>                          | Patients with exacerbation in previous year vs. patients without exacerbation                            | Median (P <sub>25</sub> -P <sub>75</sub> ) walking time (min/d): 9 (4 to 18) vs. 26 (14 to 56); p=0.03                                        | ---                                                           |
|                                                               | Patients readmitted for another exacerbation in the year following discharge vs. patients not readmitted | Median (P <sub>25</sub> -P <sub>75</sub> ) walking time (min/d): 12 (9 to 27) vs. 30 (21 to 100); p=0.03                                      | ---                                                           |

### **Determinant: Exercise capacity**

| Paper                                         | Variable / Category              | Association                                                                              |                 |
|-----------------------------------------------|----------------------------------|------------------------------------------------------------------------------------------|-----------------|
|                                               |                                  | Significant                                                                              | Non-significant |
| Altenburg, WA. 2013, Respir Med <sup>S1</sup> | 6MWD (m)                         | Adjusted regression standardized coefficient: 0.378 for daily physical activity; p<0.001 | ---             |
| Berry, MJ. 2006, Chest <sup>S6</sup>          | VO <sub>2</sub> peak (mL/kg/min) | Adjusted regression coefficient: -0.041 for self-reported function; p<0.005              | ---             |

|                                                               |                                  |                                                                                                                                                                                                                                                 |                                                                                                |
|---------------------------------------------------------------|----------------------------------|-------------------------------------------------------------------------------------------------------------------------------------------------------------------------------------------------------------------------------------------------|------------------------------------------------------------------------------------------------|
| Garcia-Rio, F. 2009, Am J Respir Crit Care Med <sup>S34</sup> | 6MWD (m)                         | Mean (SD): 199 (82) in quartile 1 (Q1) of physical activity; 263 (76) in Q2; 377 (117) in Q3; 416 (83) in Q4; p=0.001<br><br>Adjusted unstandardized regression coefficients (95% CI): 0.39 (0.24 to 0.55) for physical activity level; p=0.001 | ---                                                                                            |
|                                                               | Work peak (watts)                | Mean (SD): 48 (20) in quartile 1 (Q1); 53 (19) in Q2; 60 (22) in Q3; 79 (20) in Q4; p=0.001                                                                                                                                                     | ---                                                                                            |
|                                                               | V <sub>E</sub> peak (L/min)      | Mean (SD): 34.3 (9.9) in quartile 1 (Q1); 34.6 (8.3) in Q2; 40.7 (8.5) in Q3; 47.1 (11.4) in Q4; p=0.001                                                                                                                                        | ---                                                                                            |
|                                                               | HR peak (beats/min)              | ---                                                                                                                                                                                                                                             | Mean (SD): 122 (16) in quartile 1 (Q1); 127 (15) in Q2; 126 (12) in Q3; 131 (17) in Q4; p=0.24 |
|                                                               | VO <sub>2</sub> peak (mL/min/kg) | Mean (SD): 14.9 (3.3) in quartile 1 (Q1); 16.8 (3.1) in Q2; 19.2 (3.9) in Q3; 21.7 (3.8) in Q4; p=0.001                                                                                                                                         | ---                                                                                            |
|                                                               | Endurance time (s)               | Mean (SD): 158 (104) in quartile 1 (Q1); 256 (110) in Q2; 301 (133) in Q3; 386 (117) in Q4; p=0.001                                                                                                                                             | ---                                                                                            |
| Hartman, JE. 2013, Arch Phys Med Rehab <sup>S37</sup>         | 6MWD (m)                         | Adjusted regression coefficient (SE): 0.015 (0.003) for percentage locomotion; p<0.001                                                                                                                                                          | ---                                                                                            |
| Moy, ML. 2009, J Rehabil Res Dev <sup>S49</sup>               | 6MWD (m)                         | Unadjusted coefficient (95% CI): 10 (4 to 17) for steps per day; p=0.01                                                                                                                                                                         | ---                                                                                            |
| Nguyen, HQ. 2013, Chest <sup>S52</sup>                        | 6MWD (ft)                        | Adjusted standardized coefficient: 0.39 for total steps per day; p<0.001                                                                                                                                                                        | ---                                                                                            |

|                                               |                               |                                                                                                                                                                                                                       |     |
|-----------------------------------------------|-------------------------------|-----------------------------------------------------------------------------------------------------------------------------------------------------------------------------------------------------------------------|-----|
| Pitta, F. 2006, J Bras Pneumol <sup>S57</sup> | 6MWD (% pred)                 | Median (P <sub>25</sub> -P <sub>75</sub> ): 76 (69-79) in active group vs. 66 (42-72) in inactive group; p=0.019                                                                                                      | --- |
|                                               | VO <sub>2</sub> peak (% pred) | Median (P <sub>25</sub> -P <sub>75</sub> ): 71 (55-102) in active group vs. 49 (36-78) in inactive group; p=0.049                                                                                                     | --- |
|                                               | Wmax (% pred)                 | Median (P <sub>25</sub> -P <sub>75</sub> ): 69 (58-77) in active group vs. 40 (27-67) in inactive group; p=0.013                                                                                                      | --- |
| Van Remoortel, H. 2013, Thorax <sup>S74</sup> | 6MWD (m)                      | Adjusted coefficient (SEM): 23 (6) for steps per day; p=0.0002<br>Adjusted coefficient (SEM): 0.33 (0.09) for MVPA; p=0.0006<br>Adjusted coefficient (SEM): 0.0008 (0.0003) for PAL; p=0.02                           | --- |
| Watz, H. 2009, Eur Respir J <sup>S83</sup>    | 6MWD (m)                      | Correlation coefficient: 0.63 with steps per day; p<0.001<br>Correlation coefficient: 0.47 with minutes of at least moderate activity; p<0.001<br>Correlation coefficient: 0.46 with physical activity level; p<0.001 | --- |

#### **Determinant: FEV<sub>1</sub>**

| Paper                               | Variable / Category       | Association                                                                 |                 |
|-------------------------------------|---------------------------|-----------------------------------------------------------------------------|-----------------|
|                                     |                           | Significant                                                                 | Non-significant |
| Berry, M. 2006, Chest <sup>S6</sup> | FEV <sub>1</sub> (% pred) | Adjusted regression coefficient: -0.005 for self-reported function; p<0.005 | ---             |

|                                                               |                               |                                                                                                                                                                                                                                                |                                                                                                                                         |
|---------------------------------------------------------------|-------------------------------|------------------------------------------------------------------------------------------------------------------------------------------------------------------------------------------------------------------------------------------------|-----------------------------------------------------------------------------------------------------------------------------------------|
| Eisner, MD. 2008, Am J Epi <sup>S22</sup>                     | FEV <sub>1</sub> (L)          | Adjusted regression coefficient (SE): -1.4 (0.30) for self-reported functional limitation; p<0.0001; -1.28 (0.32) for limitation in moderate activities; p<0.0001; -1.87 (0.31) for limitation in climbing several flights of stairs; p<0.0001 | ---                                                                                                                                     |
| Garcia-Aymerich, J. 2004, Med Sci Sports Exerc <sup>S30</sup> | FEV <sub>1</sub> (% pred)     | ---                                                                                                                                                                                                                                            | Mean (SD): 35 (18) in low energy expenditure (0-53 kcal/d); 33 (13) in moderate (54-210 kcal/d); 36 (16) in high (>210 kcal/d); p=0.311 |
| Garcia-Rio, F. 2009, Am J Respir Crit Care Med <sup>S34</sup> | FEV <sub>1</sub> (% pred)     | Mean (SD): 43 (13) in quartile 1 (Q1) of physical activity; 42 (12) in Q2; 49 (14) in Q3; 54 (13) in Q4; p=0.01                                                                                                                                | ---                                                                                                                                     |
|                                                               | FEV <sub>1</sub> (GOLD stage) | Mean (SD) daily physical activity (VMU): 223 (95) in GOLD II vs. 170 (75) in GOLD III; p=0.01;<br>Mean (SD) daily physical activity (VMU): 223 (95) in GOLD II vs. 134 (67) in GOLD IV; p=0.001                                                | ---                                                                                                                                     |
| Katajisto, M. 2012, Int J Chron Obstr Pulm Dis <sup>S41</sup> | FEV <sub>1</sub> (% pred)     | Adjusted OR (95% CI) of exercise inactivity: 3.5 (1.8 to 6.9) in patients with FEV <sub>1</sub> <40% compared to FEV <sub>1</sub> >40%                                                                                                         | ---                                                                                                                                     |
| Lahajje, A. 2013, Respir Med <sup>S42</sup>                   | FEV <sub>1</sub> (% pred)     | ---                                                                                                                                                                                                                                            | Adjusted unstandardized coefficients (SE): -0.006 (0.084) for mean daily physical activity; p=0.939                                     |
| Moy, ML. 2009, J Rehabil Res Dev <sup>S49</sup>               | FEV <sub>1</sub> (%pred)      | Unadjusted coefficient (95% CI): 0.023 (0.005 to 0.041) for number of checklist physical activity performed; p=0.01                                                                                                                            | ---                                                                                                                                     |
| Pitta, F. 2006, J Bras                                        | FEV <sub>1</sub> (%pred)      | Median (P <sub>25</sub> -P <sub>75</sub> ): 50 (40-58) in active group vs.                                                                                                                                                                     | ---                                                                                                                                     |

|                                                         |                               |                                                                                                                                                                                                                                                                                                                                                                                                                                                                                                                                            |                                                                                                                                                                                                                                                                                                |
|---------------------------------------------------------|-------------------------------|--------------------------------------------------------------------------------------------------------------------------------------------------------------------------------------------------------------------------------------------------------------------------------------------------------------------------------------------------------------------------------------------------------------------------------------------------------------------------------------------------------------------------------------------|------------------------------------------------------------------------------------------------------------------------------------------------------------------------------------------------------------------------------------------------------------------------------------------------|
| Pneumol <sup>S57</sup>                                  |                               | 34 (33-44) in inactive group; p=0.021                                                                                                                                                                                                                                                                                                                                                                                                                                                                                                      |                                                                                                                                                                                                                                                                                                |
| Pitta, F. 2008, Respir Med <sup>S58</sup>               | FEV <sub>1</sub> (l)          | ---                                                                                                                                                                                                                                                                                                                                                                                                                                                                                                                                        | Correlation coefficients (95% CI) of 0.31 (-0.01 to 0.58) with EEA>3METs, p=0.05; 0.25 (-0.08 to 0.53) with steps/day, p=ns; -0.26 (-0.53 to 0.06) with sedentary activities, p=ns; 0.29 (-0.04 to 0.56) with moderate activities, p=ns; 0.31 (-0.01 to 0.59) with vigorous activities, p=0.05 |
| Troosters, T. 2010, Respir Med <sup>S71</sup>           | FEV <sub>1</sub> (GOLD stage) | <p>Mean (SD) daily steps (% healthy pairs): 87(35) in GOLD I; 70(32) in GOLD II; 49(34) in GOLD III; 29(19) in GOLD IV; p&lt;0.05</p> <p>Correlation coefficient FEV<sub>1</sub> %predicted: 0.51 with number steps per day; p&lt;0.0001</p> <p>Mean(SD) daily time in moderate physical activity (% healthy pairs): 53(48) in GOLD I; 41(45) in GOLD II; 31(48) in GOLD III; 22(33) in GOLD IV; p&lt;0.05</p> <p>Correlation coefficient FEV<sub>1</sub> %predicted: 0.33 with time spent in activities of mild intensity; p&lt;0.006</p> | ---                                                                                                                                                                                                                                                                                            |
| Watz, H. 2008, Am J Respir Crit Care Med <sup>S81</sup> | FEV <sub>1</sub> (GOLD stage) | <p>Mean (SD) steps per day: 7990 (3370) in GOLD I; 7160 (3284) in GOLD II; 5126 (3692) in GOLD III and 2773 (1897) in GOLD IV; p&lt;0.001</p> <p>Unstandardized regression coefficient (95% CI) GOLD III: -2714 (-4155 to -1273) for steps per day; p&lt;0.001</p> <p>Unstandardized regression coefficient (95% CI) GOLD IV: -4272 (-5801 to -2742) for steps per day; p&lt;0.001</p>                                                                                                                                                     | <p>Adjusted unstandardized regression coefficient (95% CI) GOLD II: -939 (-2226 to 349) for steps per day; p=0.28</p> <p>Adjusted unstandardized regression coefficient (95% CI) GOLD II: -0.009 (-0.111 to 0.093) for physical activity level; p=0.86</p>                                     |



|                                            |                               |                                                                                                                                                                                                                                                                                                                                                                                                                                                                                                                                                                                                                                                                                                                                                                                                                                                                                                                                                                                           |     |
|--------------------------------------------|-------------------------------|-------------------------------------------------------------------------------------------------------------------------------------------------------------------------------------------------------------------------------------------------------------------------------------------------------------------------------------------------------------------------------------------------------------------------------------------------------------------------------------------------------------------------------------------------------------------------------------------------------------------------------------------------------------------------------------------------------------------------------------------------------------------------------------------------------------------------------------------------------------------------------------------------------------------------------------------------------------------------------------------|-----|
|                                            |                               | <p>Mean (SD) physical activity level: 1.63 (0.25) in GOLD I; 1.62 (0.27) in GOLD II; 1.45 (0.25) in GOLD 3 and 1.27 (0.17) in GOLD IV; <math>p&lt;0.001</math></p> <p>N (%) physical activity level <math>\geq 1.70</math>: 9 (26) in GOLD I; 18 (32) in GOLD II; 9 (21) in GOLD III and 1 (3) in GOLD IV; <math>p&lt;0.01</math></p> <p>Unstandardized regression coefficient (95% CI) GOLD III: -0.128 (-0.242 to -0.014) for physical activity level; <math>p=0.028</math></p> <p>Unstandardized regression coefficient (95% CI) GOLD IV: -0.263 (-0.384 to -0.142) for physical activity level; <math>p&lt;0.001</math></p>                                                                                                                                                                                                                                                                                                                                                           |     |
| Watz, H. 2009, Chest <sup>S82</sup>        | FEV <sub>1</sub> (GOLD stage) | <p>Mean (SD) physical activity level: 1.63 (0.25) in GOLD I; 1.62 (0.27) in GOLD II; 1.45 (0.25) in GOLD 3 and 1.27 (0.17) in GOLD IV; <math>p&lt;0.001</math></p>                                                                                                                                                                                                                                                                                                                                                                                                                                                                                                                                                                                                                                                                                                                                                                                                                        | --- |
| Watz, H. 2009, Eur Respir J <sup>S83</sup> | FEV <sub>1</sub> (GOLD stage) | <p>Mean steps per day: 5000 in GOLD III vs. 8000 in GOLD I; <math>p&lt;0.001</math>; 5000 in GOLD III vs. 7600 in GOLD II; <math>p=0.001</math>; 4500 in GOLD IV vs. 8000 in GOLD I; <math>p&lt;0.001</math>; 4500 in GOLD IV vs. 7600 in GOLD II; <math>p&lt;0.001</math>; 4500 in GOLD IV vs. 5000 in GOLD III; <math>p=0.003</math></p> <p>Mean minutes &gt;3 METs min: 110 in GOLD III vs. 145 in GOLD I; <math>p=0.04</math>; 110 in GOLD III vs. 145 in GOLD II; <math>p=0.02</math>; 55 in GOLD IV vs. 145 in GOLD I; <math>p&lt;0.001</math>; 55 in GOLD IV vs. 145 in GOLD II; <math>p&lt;0.001</math>; 55 in GOLD IV vs. 110 in GOLD III; <math>p=0.002</math></p> <p>Mean physical activity level: 1.46 in GOLD III vs. 1.63 in GOLD I; <math>p&lt;0.001</math>; 1.46 in GOLD III vs. 1.62 in GOLD II; <math>p&lt;0.001</math>; 1.29 in GOLD IV vs. 1.63 in GOLD I; <math>p&lt;0.001</math>; 1.29 in GOLD IV vs. 1.62 in GOLD II; <math>p&lt;0.001</math>; 1.29 in GOLD IV</p> | --- |

|                                             |                             |                                                                                                                                                                                                                                 |     |
|---------------------------------------------|-----------------------------|---------------------------------------------------------------------------------------------------------------------------------------------------------------------------------------------------------------------------------|-----|
|                                             |                             | vs. 1.46 in GOLD III; p=0.006<br>(Note: Numbers derived from the figure)                                                                                                                                                        |     |
| Yeo, J. 2006, Age and ageing <sup>S86</sup> | FEV <sub>1</sub> (Severity) | Mean (SD) Manchester ADL score: 11.7 (6.5) in mild COPD vs. 13.4 (4.6) in moderate COPD; p=0.75; 11.7 (6.5) in mild COPD vs. 5.2 (2.8) in severe COPD; p=0.09; 13.4 (4.6) in moderate COPD vs. 5.2 (2.8) in severe COPD; p=0.02 | --- |

### **Determinant: FVC**

| Paper                                                         | Variable / Category  | Association                                                                                                      |                                                                                         |
|---------------------------------------------------------------|----------------------|------------------------------------------------------------------------------------------------------------------|-----------------------------------------------------------------------------------------|
|                                                               |                      | Significant                                                                                                      | Non-significant                                                                         |
| Garcia-Rio, F. 2009, Am J Respir Crit Care Med <sup>S34</sup> | postPBD FVC (% pred) | Mean (SD): 71 (14) in quartile 1 (Q1) of physical activity; 70 (14) in Q2; 80 (15) in Q3; 79 (15) in Q4; p=0.02; | ---                                                                                     |
| Pitta, F. 2006, J Bras Pneumol <sup>S57</sup>                 | FVC (% pred)         | ---                                                                                                              | Median (P25-P75): 80 (74-113) in active group vs. 80 (78-87) in inactive group; p=0.902 |

### **Determinant: Gas exchange**

| Paper                                                         | Variable / Category            | Association                                                                                      |                 |
|---------------------------------------------------------------|--------------------------------|--------------------------------------------------------------------------------------------------|-----------------|
|                                                               |                                | Significant                                                                                      | Non-significant |
| Garcia-Rio, F. 2009, Am J Respir Crit Care Med <sup>S34</sup> | DL <sub>CO</sub> (% predicted) | Mean (SD): 61(27) in quartile 1 (Q1) of physical activity; 75(22) in Q2; 77(25) in Q3; 94(23) in | ---             |

|                                                               |                                |                                                                                                                                                   |                                                                                                                                                    |
|---------------------------------------------------------------|--------------------------------|---------------------------------------------------------------------------------------------------------------------------------------------------|----------------------------------------------------------------------------------------------------------------------------------------------------|
|                                                               |                                | Q4; p=0.001                                                                                                                                       |                                                                                                                                                    |
| Van Remoortel, H. 2013, Thorax <sup>S74</sup>                 | DL <sub>CO</sub> (% predicted) | Adjusted coefficient (SEM): 591 (282) for steps per day; p=0.04<br>Adjusted coefficient (SEM): 0.04 (0.02) for steps per day; p=0.03              | ---                                                                                                                                                |
| Garcia-Aymerich, J. 2004, Med Sci Sports Exerc <sup>S30</sup> | PCO <sub>2</sub> (mmHg)        | ---                                                                                                                                               | Mean (SD): 45.7 (9.3) in low energy expenditure (0-53 kcal/d); 46.2 (10.3) in moderate (54-210 kcal/d); 45.9 (7.05) in high (>210 kcal/d); p=0.955 |
| Garcia-Rio, F. 2009, Am J Respir Crit Care Med <sup>S34</sup> | PCO <sub>2</sub> (mmHg)        | ---                                                                                                                                               | Mean (SD): 41.8 (5.5) in quartile 1 (Q1); 40.4 (5.8) in Q2; 40.2 (3.5) in Q3; 38.7 (5.1) in Q4; p=0.27                                             |
| Garcia-Aymerich, J. 2004, Med Sci Sports Exerc <sup>S30</sup> | PO <sub>2</sub> (mmHg)         | Mean (SD): 63.3 (13.3) in low energy expenditure (0-53 kcal/d); 61 (11.7) in moderate (54-210 kcal/d); 65.8 (12.6) in high (>210 kcal/d); p=0.042 | ---                                                                                                                                                |
| Garcia-Rio, F. 2009, Am J Respir Crit Care Med <sup>S34</sup> | PO <sub>2</sub> (mmHg)         | Mean (SD): 64.0 (8.7) in quartile 1 (Q1); 64.3 (8.6) in Q2; 68.3 (6.9) in Q3; 71.0 (6.6) in Q4; p=0.01                                            | ---                                                                                                                                                |

### **Determinant: Hyperinflation (Static and Dynamic)**

| Paper                     | Variable / Category | Association                                                                                  |                 |
|---------------------------|---------------------|----------------------------------------------------------------------------------------------|-----------------|
|                           |                     | Significant                                                                                  | Non-significant |
| Garcia-Rio, F. 2009, Am J | TLC (% pred)        | Mean (SD): 112 (16) in quartile 1 (Q1) of physical activity; 112 (21) in Q2; 107 (13) in Q3; | ---             |

|                                                       |                              |                                                                                                                                                                                                                                    |                                                                                                                      |
|-------------------------------------------------------|------------------------------|------------------------------------------------------------------------------------------------------------------------------------------------------------------------------------------------------------------------------------|----------------------------------------------------------------------------------------------------------------------|
| Respir Crit Care Med <sup>S34</sup>                   |                              | 99 (17) in Q4; p=0.02                                                                                                                                                                                                              |                                                                                                                      |
|                                                       | RV/TLC (%)                   | Mean (SD): 60 (7) in quartile 1 (Q1) of physical activity; 59 (9) in Q2; 56 (9) in Q3; 52 (8) in Q4; p=0.002                                                                                                                       | ---                                                                                                                  |
|                                                       | ΔEELV (l)                    | Mean (SD): 0.83 (0.49) in quartile 1 (Q1) of physical activity; 0.60 (0.29) in Q2; 0.35 (0.38) in Q3; -0.05 (0.20) in Q4; p=0.001<br><br>Adjusted standardized regression coefficients: -0.24 for physical activity level; p=0.001 | ---                                                                                                                  |
|                                                       | ΔEILV (l)                    | Mean (SD): 1.43 (0.53) in quartile 1 (Q1) of physical activity; 1.15 (0.42) in Q2; 1.17 (0.57) in Q3; 0.77 (0.52) in Q4; p=0.001                                                                                                   | ---                                                                                                                  |
|                                                       | Dynamic hyperinflation (Y/N) | Adjusted standardized regression coefficients: -0.34 for physical activity level; p=0.001                                                                                                                                          | ---                                                                                                                  |
| Hartman, JE. 2013, Arch Phys Med Rehab <sup>S37</sup> | RV (l)                       | Adjusted regression coefficient (SE): -0.612 (0.200) for percentage locomotion; p=0.003                                                                                                                                            | ---                                                                                                                  |
| Lahaije, AJ. 2013, Respir Med <sup>S42</sup>          | IC/TLC                       | Adjusted unstandardized coefficients (SE): 78.546 (24.677) for mean physical activity; p=0.002                                                                                                                                     | ---                                                                                                                  |
|                                                       | %ΔIC                         | Adjusted unstandardized coefficients (SE): 0.27 (0.132) for mean physical activity; p=0.046                                                                                                                                        | ---                                                                                                                  |
|                                                       | IRV/TLC                      | ---                                                                                                                                                                                                                                | Adjusted unstandardized coefficients (SE): -0.027 (0.354) for mean physical activity; p=0.940                        |
| Pitta, F. 2006, J Bras Pneumol <sup>S57</sup>         | IC/TLC                       | ---                                                                                                                                                                                                                                | Median (P <sub>25</sub> -P <sub>75</sub> ): 0.28 (0.21-0.34) in active group vs. 0.27 (0.26-0.31) in inactive group; |

|                                           |        |                                                                                                                                       |                                                                                                                                                                                            |
|-------------------------------------------|--------|---------------------------------------------------------------------------------------------------------------------------------------|--------------------------------------------------------------------------------------------------------------------------------------------------------------------------------------------|
|                                           |        |                                                                                                                                       | p=0.923                                                                                                                                                                                    |
| Pitta, F. 2008, Respir Med <sup>S58</sup> | IC (I) | Correlation coefficients (95% CI) of 0.35 (0.02 to 0.60) with steps/day, p<0.05; 0.33 (0.01 to 0.59) with vigorous activities; p<0.05 | Correlation coefficients (95% CI) of 0.30 (-0.03 to 0.57) with EEA>3METs, p=ns; -0.27 (-0.54 to 0.06) with sedentary activities, p=ns; 0.25 (-0.08 to 0.53) with moderate activities, p=ns |

### **Determinant: Intervention – Long-acting $\beta$ 2-agonist/Corticosteroids**

| Paper                                                           | Variable / Category         | Association                                                                                                                                                                                        |                                                                                                                                     |
|-----------------------------------------------------------------|-----------------------------|----------------------------------------------------------------------------------------------------------------------------------------------------------------------------------------------------|-------------------------------------------------------------------------------------------------------------------------------------|
|                                                                 |                             | Significant                                                                                                                                                                                        | Non-significant                                                                                                                     |
| Garcia-Aymerich, J. 2004, Med Sci Sports Exerc <sup>S30</sup>   | Oral corticosteroids        | N (%): 34 (31) in low energy expenditure (0-53 kcal/d); 20 (20) in moderate (54-210 kcal/d); 17 (15) in high (>210 kcal/d); p=0.013                                                                | ---                                                                                                                                 |
|                                                                 | Inhaled corticosteroids     | ---                                                                                                                                                                                                | N (%): 59 (53) in low energy expenditure (0-53 kcal/d); 64 (63) in moderate (54-210 kcal/d); 70 (61) in high (>210 kcal/d); p=0.282 |
| Garcia-Rio, F. 2009, Am J Respir Crit Care Med <sup>S34</sup>   | Inhaled corticosteroids     | ---                                                                                                                                                                                                | N (%): 21 (78) in quartile 1 (Q1) of physical activity; 23 (82) in Q2; 22 (79) in Q3; 19 (70) in Q4; p=0.77                         |
| Hataji, O. 2013, Int J Chron Obstruct Pulmon Dis <sup>S38</sup> | Before vs. After inhalation | Mean (SEM) steps: 6241 (653) vs. 7858 (848); p=0.0002<br>Mean (SEM) physical activity time: 876 (171) vs. 1496 (285) seconds; p<0.0001<br>Mean (SEM) kilocalories: 148 (18) vs. 194 (23); p<0.0001 | ---                                                                                                                                 |

### **Determinant: Intervention – Dietary**

| Paper                                                      | Variable / Category                                                | Association                                                                                                                                       |                                                                                                          |
|------------------------------------------------------------|--------------------------------------------------------------------|---------------------------------------------------------------------------------------------------------------------------------------------------|----------------------------------------------------------------------------------------------------------|
|                                                            |                                                                    | Significant                                                                                                                                       | Non-significant                                                                                          |
| dal Negro, RW. 2010, Monaldi Arch Chest Dis <sup>S16</sup> | Essential amino acids supplementation group vs. Placebo group      | Mean (SD) number of steps after 4 weeks: 880 (837) vs. 652 (558); and after 12 weeks: 1141 (524) vs. 563 (602); p group x time interaction=0.0027 | ---                                                                                                      |
| Weekes, CE. 2009, Thorax <sup>S84</sup>                    | Intervention group vs. Control group (intention-to-treat analysis) | Median (P <sub>25</sub> -P <sub>75</sub> ) ADL score after intervention: 11 (7 to 17) vs. 13 (8 to 18); p=0.02                                    | ---                                                                                                      |
|                                                            | Intervention group vs. Control group (who completed study)         | Median (P <sub>25</sub> -P <sub>75</sub> ) ADL score at 6 months: 11 (7 to 17) vs. 13 (8 to 18); p=0.02                                           | Median (P <sub>25</sub> -P <sub>75</sub> ) ADL score at 12 months: 10 (7 to 16) vs. 13 (9 to 19); p=0.06 |

### **Determinant: Intervention – Exercise training**

| Paper                                           | Variable / Category                       | Association                                                                 |                 |
|-------------------------------------------------|-------------------------------------------|-----------------------------------------------------------------------------|-----------------|
|                                                 |                                           | Significant                                                                 | Non-significant |
| Behnke, M. 2005, Respir Med <sup>S3</sup>       | Intervention vs. Control group            | Mean (SD) activity per day (counts): 126.2 (37.0) vs. 72.2 (13.6); p<0.0005 | ---             |
| Bendstrup, KE. 1997, Eur Respir J <sup>S4</sup> | Intervention vs. Control group at week 12 | Mean (SEM) ADL score: 17.7 (5.6) vs. -4.4 (4.1); p=0.004                    | ---             |
|                                                 | Intervention vs. Control group at week 24 | Mean (SEM) ADL score: 14.4 (4.7) vs. -9.8 (6.7); p=0.007                    | ---             |

|                                                  |                                      |                                                                                                                                                                                                                |                                                                                                    |
|--------------------------------------------------|--------------------------------------|----------------------------------------------------------------------------------------------------------------------------------------------------------------------------------------------------------------|----------------------------------------------------------------------------------------------------|
| Berry, MJ. 2010, Respir Med <sup>S7</sup>        | Baseline vs. at 3 month              | Mean physical activity (kcal/week) in traditional exercise therapy program: 1860 vs. 2500; p=0.002<br><br>Mean physical activity (kcal/week) in behavioural lifestyle activity program: 1860 vs. 2498; p=0.004 | ---                                                                                                |
|                                                  | Baseline vs. at 6 month              | Mean physical activity (kcal/week) in traditional exercise therapy program 1860 vs. 2210; p=0.039;<br><br>Mean physical activity (kcal/week) in behavioural lifestyle activity program 1860 vs. 2456; p=0.005  | ---                                                                                                |
|                                                  | Baseline vs. at 12 month             | Mean physical activity (kcal/week) in behavioural lifestyle activity program 1850 vs. 2342; p=0.048                                                                                                            | Mean physical activity (kcal/week) in traditional exercise therapy program 1850 vs. 2213; p=0.089; |
| Breyer, MK. 2010, Respir Research <sup>S12</sup> | Intervention vs. Control at 3 months | Increase in movement intensity, p<0.01<br>Increase in walking time, p=0.034<br>Decrease in sitting time, p=0.014                                                                                               | ---                                                                                                |
|                                                  | Intervention vs. Control at 6 months | Increase in movement intensity, p<0.01<br>Increase in walking time, p=0.05<br>Decrease in sitting time, p<0.01<br>Increase in standing time, p<0.01                                                            | ---                                                                                                |
|                                                  | Intervention vs. Control at 9 months | Increase in movement intensity, p<0.01<br>Increase in standing time, p<0.01                                                                                                                                    | ---                                                                                                |
| Coronado, M. 2003, J                             | Baseline vs. after 3-week            | Mean (SD) % of total time of medium activity: 4                                                                                                                                                                | Mean (SD) % of total time of inactivity: 82 (5)                                                    |

|                                                   |                                                                                   |                                                                            |                                                                                                                                                                                                                     |
|---------------------------------------------------|-----------------------------------------------------------------------------------|----------------------------------------------------------------------------|---------------------------------------------------------------------------------------------------------------------------------------------------------------------------------------------------------------------|
| Cardiopulm Rehab <sup>S15</sup>                   | rehabilitation program<br>(including training sessions)                           | (4) vs. 7(5); p=0.04                                                       | vs. 78 (8); p=0.09<br>Mean (SD) % of total time of low activity: 13 (4) vs. 15 (5); p=0.07                                                                                                                          |
|                                                   | Baseline vs. after 3-week rehabilitation program<br>(excluding training sessions) | ---                                                                        | Mean (SD) % of total time of inactivity: 85 (5) vs. 82 (9); p=0.13<br>Mean (SD) % of total time of low activity: 11 (3) vs. 13 (5); p=0.24<br>Mean (SD) % of total time of medium activity: 4 (3) vs. 5 (5); p=0.42 |
| Dallas, MI. 2009, Chron Respir Dis <sup>S17</sup> | Baseline vs. after 6- to 12-week rehabilitation program                           | ---                                                                        | Mean (SD) change in pedometer counts per hour: 33 (149); p=0.14                                                                                                                                                     |
| Daly, C. 2011, Physiot Ireland <sup>S18</sup>     | Baseline vs. after 8-week NMES training program                                   | ---                                                                        | Mean difference in VMU/day: 40158; p=0.401<br>Mean difference in VMU/min: 21; p=0.575<br>Mean difference in % activity > 500 VMU: 4; p=0.674<br>Mean difference in % time > 500 VMU: 3; p=0.327                     |
| Effing, T. 2011, Respir Med <sup>S20</sup>        | Intervention vs. Control group                                                    | Mean difference (95% CI) in steps per day at 12 months: 1190 (256 to 2125) | ---                                                                                                                                                                                                                 |
| Egan, C. 2012, Respir Med <sup>S21</sup>          | Baseline vs. after 7-week rehabilitation program (short term effects)             | ---                                                                        | Mean (SD) total energy expenditure: 1951 (471) vs. 1860 (420); p=ns<br>Mean (SD) active energy expenditure: 256 (401) vs. 208 (232); p=ns<br>Mean (SD) physical activity duration: 48 (67) vs. 51 (53); p=ns        |



|  |                                                                     |     |                                                                                                                                                                                                                                                                                                                                                                                                                                                                                           |
|--|---------------------------------------------------------------------|-----|-------------------------------------------------------------------------------------------------------------------------------------------------------------------------------------------------------------------------------------------------------------------------------------------------------------------------------------------------------------------------------------------------------------------------------------------------------------------------------------------|
|  |                                                                     |     | <p>Mean (SD) % time spend in moderate activity: 74 (104) vs. 79 (82); p=ns</p> <p>Mean (SD) METs: 1.2 (0.3) vs. 1.2 (0.3); p=ns</p> <p>Mean (SD) daily steps: 3611 (2863) vs. 3527 (2870); p=ns</p> <p>Mean (SD) %time sedentary: 94 (8) vs. 94 (4); p=ns</p>                                                                                                                                                                                                                             |
|  | Baseline vs. after 20-week (medium term effects)                    | --- | <p>Mean (SD) total energy expenditure: 1951 (471) vs. 1953 (485); p=ns</p> <p>Mean (SD) active energy expenditure: 256 (401) vs. 227 (312); p=ns</p> <p>Mean (SD) physical activity duration: 48 (67) vs. 48 (64); p=ns</p> <p>Mean (SD) % time spend in moderate activity: 74 (104) vs. 74 (99); p=ns</p> <p>Mean (SD) METs: 1.2 (0.3) vs. 1.1 (0.3); p=ns</p> <p>Mean (SD) daily steps: 3611 (2863) vs. 3242 (3436); p=ns</p> <p>Mean (SD) %Time Sedentary: 94 (8) vs. 92 (7); p=ns</p> |
|  | Baseline vs. after 52-week (long term effects on a subsample, n=17) | --- | <p>Mean (SD) total energy expenditure: 1917 (500) vs. 2123 (871); p=ns</p> <p>Mean (SD) active energy expenditure: 270 (432) vs. 477 (736); p=ns</p> <p>Mean (SD) physical activity duration: 62 (98) vs. 79 (112); p=ns</p> <p>Mean (SD) METs: 1.2 (0.3) vs. 1.2 (0.3); p=ns</p>                                                                                                                                                                                                         |

|                                                             |                                                                                    |                                                                                                                                                                                                                                            |                                                                                                                                                                                                         |
|-------------------------------------------------------------|------------------------------------------------------------------------------------|--------------------------------------------------------------------------------------------------------------------------------------------------------------------------------------------------------------------------------------------|---------------------------------------------------------------------------------------------------------------------------------------------------------------------------------------------------------|
|                                                             |                                                                                    |                                                                                                                                                                                                                                            | Mean (SD) daily steps: 3702 (2270) vs. 3083 (1938); p=ns<br>Mean (SD) %Time Sedentary: 93 (7) vs. 92 (9); p=ns                                                                                          |
| Faager, G. 2004, J Rehabil Med <sup>S27</sup>               | Intervention vs. Control group                                                     | Mean (P <sub>25</sub> -P <sub>75</sub> ) ADL score after the rehabilitation program: 0.9 (0.3-1.4) vs. 1.3 (0-2.3); p<0.01                                                                                                                 | ---                                                                                                                                                                                                     |
| Faulkner, J. 2010, Prim Care Resp J <sup>S28</sup>          | Intervention vs. Control group                                                     | ---                                                                                                                                                                                                                                        | Difference mean (95%CI) of 7 day total physical activity (kcal) after 8-week program: -85.5 (-807 to 636)                                                                                               |
| Mador, MJ. 2011, J Cardiopulmon Rehab Prev <sup>S46</sup>   | Baseline vs. after 8-week rehabilitation program                                   | ---                                                                                                                                                                                                                                        | Absolute difference of means (SD) of total VMU/min: 3.7 (39.1); p=0.65                                                                                                                                  |
| Nield, M. 2005, J Cardiopulm Rehab <sup>S53</sup>           | Baseline vs. after 6-week rehabilitation program                                   | Mean (SD) Human Activity Scale (maximal activity score): 55 (14) vs. 64 (13); p=0.001<br>Mean (SD) Human Activity Scale (adjusted activity score): 42 (15) vs. 48 (13); p<0.001                                                            | ---                                                                                                                                                                                                     |
| Pomidori, L. 2012, J Cardiopulmon Rehab Prev <sup>S60</sup> | Group walked with metronome vs. Group walked a fixed distance                      | Absolute difference between baseline and after 12 months (SD) in METs daily average: 0.17 (0.14) vs. 0.04 (0.13); p<0.05<br>Absolute difference between baseline and after 12 months (SD) in time >3 METs (h): 35 (32) vs. 13 (28); p<0.05 | ---                                                                                                                                                                                                     |
| Probst, VS. 2011, Respir Care <sup>S61</sup>                | Baseline vs. after 12-week in low-intensity and in high-intensity training program | ---                                                                                                                                                                                                                                        | Mean (SD) in time spent per day walking (min): 58 (24) vs. 43 (26) in low-intensity group; p=0.051; and 57 (32) vs. 53 (39) in high-intensity group; p>0.05<br>Mean (SD) in time spent per day standing |

|                                                   |                                                               |     |                                                                                                                                                                                                                                                                                                                                                                                                                                                                                                                                                                                                                                                                                                                                                                                                                                                                                                                                                                                                                                                                                                                                                                                                                                                                                                                                                                                                                                              |
|---------------------------------------------------|---------------------------------------------------------------|-----|----------------------------------------------------------------------------------------------------------------------------------------------------------------------------------------------------------------------------------------------------------------------------------------------------------------------------------------------------------------------------------------------------------------------------------------------------------------------------------------------------------------------------------------------------------------------------------------------------------------------------------------------------------------------------------------------------------------------------------------------------------------------------------------------------------------------------------------------------------------------------------------------------------------------------------------------------------------------------------------------------------------------------------------------------------------------------------------------------------------------------------------------------------------------------------------------------------------------------------------------------------------------------------------------------------------------------------------------------------------------------------------------------------------------------------------------|
|                                                   |                                                               |     | <p>(min): 270 (139) vs. 228 (127) in low-intensity group; <math>p&gt;0.05</math>; and 248 (95) vs. 245 (105) in high-intensity group; <math>p&gt;0.05</math></p> <p>Mean (SD) in time spent per day sitting (min): 283 (121) vs. 326 (129) in low-intensity group; <math>p&gt;0.05</math>; and 296 (91) vs. 312 (106) in high-intensity group; <math>p&gt;0.05</math></p> <p>Mean (SD) in time spent per day laying (min): 108 (100) vs. 116 (90) in low-intensity group; <math>p&gt;0.05</math>; and 113 (109) vs. 100 (78) in high-intensity group; <math>p&gt;0.05</math></p> <p>Mean (SD) in total energy expenditure (Kcal): 1331 (596) vs. 1365 (824) in low-intensity group; <math>p&gt;0.05</math>; and 1295 (635) vs. 1298 (565) in high-intensity group; <math>p&gt;0.05</math></p> <p>Mean (SD) in energy expenditure <math>&gt;3</math> METS (Kcal): 428 (620) vs. 337 (466) in low-intensity group; <math>p&gt;0.05</math>; and 408 (620) vs. 396 (542) in high-intensity group; <math>p&gt;0.05</math></p> <p>Mean (SD) in time spent activities <math>&gt;3</math> METS (min): 76 (99) vs. 54 (67) in low-intensity group; <math>p&gt;0.05</math>; and 76 (89) vs. 74 (85) in high-intensity group; <math>p&gt;0.05</math></p> <p>Mean (SD) in steps per day: 5002 (4195) vs. 4336 (3910) in low-intensity group; <math>p&gt;0.05</math>; and 4568 (3381) vs. 4290 (3253) in high-intensity group; <math>p&gt;0.05</math></p> |
| Schou, L. 2013, J Telemed Telecare <sup>S64</sup> | Telemedicine intervention vs. conventional hospital treatment | --- | <p>Mean (SD) in activity of daily living: 2.0 (2.6) vs. 1.5 (1.7) 3 days after discharge; <math>p=0.86</math></p> <p>Mean (SD) in activity of daily living: 1.5 (2.7) vs. 2.2 (2.7) at follow-up after 6 weeks; <math>p=0.79</math></p>                                                                                                                                                                                                                                                                                                                                                                                                                                                                                                                                                                                                                                                                                                                                                                                                                                                                                                                                                                                                                                                                                                                                                                                                      |

|                                                         |                                                                            |                                                                                                                                                                                                                                                                                                                  |                                                                                                                                                       |
|---------------------------------------------------------|----------------------------------------------------------------------------|------------------------------------------------------------------------------------------------------------------------------------------------------------------------------------------------------------------------------------------------------------------------------------------------------------------|-------------------------------------------------------------------------------------------------------------------------------------------------------|
|                                                         |                                                                            |                                                                                                                                                                                                                                                                                                                  | Mean (SD) in activity of daily living: 1.9 (2.9) vs. 1.1 (1.5) at follow-up after 3 months; p=0.93                                                    |
| Sewell, L. 2005, Chest <sup>S65</sup>                   | Baseline vs. after 7-week in individually targeted exercise program (ITEP) | Mean (95%CI) % change in activity counts: 41% (7 to 74) in individually targeted exercise program (ITEP) rehabilitation program; p=0.02<br><br>Mean (95%CI) change in COPM performance score: 1.46 (1.05 to 1.87); p=0.0001<br><br>Mean (95%CI) change in COPM satisfaction score: 2.04 (1.56 to 2.52); p=0.0001 | ---                                                                                                                                                   |
|                                                         | Baseline vs. after 7-week in general exercise program (GEP)                | Mean (95%CI) % change in activity counts: 29% (3 to 55); p= 0.03<br><br>Mean (95%CI) change in COPM performance score: 1.71 (1.37 to 2.05); p=0.0001<br><br>Mean (95%CI) change in COPM satisfaction score: 2.27 (1.74 to 2.81); p=0.0001                                                                        | ---                                                                                                                                                   |
| Sewell, L. 2010, J Cardiopulm Rehab Prev <sup>S66</sup> | Baseline vs. after 7-week rehabilitation                                   | ---                                                                                                                                                                                                                                                                                                              | Mean change (95% CI) in activity monitor counts (%): 33 (-3 to 70) in spring, 2 (-33 to 37) in summer, 38 (-2 to 78) in autumn, 130 (-2 to 263); p=ns |
| Skumlien, S. 2008, Respir Med <sup>S69</sup>            | Baseline vs. after 12-week in resistance training program                  | ---                                                                                                                                                                                                                                                                                                              | Mean (95%CI) change in ADL time (min): -0.1 (-0.6 to 0.5); p=ns<br><br>Mean (95%CI) change in HPAQ score: -60 (-614 to 495); p=ns                     |
|                                                         | Baseline vs. after 12-week in endurance training program                   | ---                                                                                                                                                                                                                                                                                                              | Mean (95%CI) change in ADL time (min): -0.3 (-0.6 to 0); p=ns<br><br>Mean (95%CI) change in HPAQ score: 241 (-498 to 982); p=ns                       |

|                                              |                                                        |                                                                                                                                                                                                                                                                                                         |     |
|----------------------------------------------|--------------------------------------------------------|---------------------------------------------------------------------------------------------------------------------------------------------------------------------------------------------------------------------------------------------------------------------------------------------------------|-----|
| Takigawa, N. 2007, Respir Med <sup>S70</sup> | Baseline vs. after 4- to 8-week rehabilitation program | <p>Mean (SD) velocity of motion in GOLD II: 24.6 (4.1) vs. 25.9 (4.2); p=0.023</p> <p>Mean (SD) velocity of motion in GOLD III: 22.8 (6.0) vs. 25.2 (4.5) post-PR; p=0.000</p> <p>Mean (SD) velocity of motion in GOLD IV: 18.1 (6.5) vs. 21.1 (5.9); p=0.000</p>                                       | --- |
| Walker, PP. 2008, Thorax <sup>S79</sup>      | Baseline vs. after 8-week rehabilitation program       | <p>Mean (SE) intensity of activity score: 156 (69.2) vs. 208.5 (123.4); p=0.001</p> <p>Mean (SE) activity score: 81.5 (53.2) vs. 117.2 (84.2); p=0.002</p> <p>Mean (SE) % time spent mobile: 50.0 (2.7) vs. 55.2 (2.6); p=0.014</p> <p>Mean (SE) NEADL score: 16.4 (0.5) vs. 18.2 (0.5); p&lt;0.001</p> | --- |

### **Determinant: Intervention – Oxygen therapy**

| Paper                                                         | Variable / Category                         | Association                                                                                                                                                                                                                      |                 |
|---------------------------------------------------------------|---------------------------------------------|----------------------------------------------------------------------------------------------------------------------------------------------------------------------------------------------------------------------------------|-----------------|
|                                                               |                                             | Significant                                                                                                                                                                                                                      | Non-significant |
| Garcia-Aymerich, J. 2004, Med Sci Sports Exerc <sup>S30</sup> | Long term oxygen therapy (LTOT) utilization | <p>N (%): 51 (46) in low energy expenditure (0-53 kcal/d); 30 (30) in moderate (54-210 kcal/d); 27 (23) in high (&gt;210 kcal/d); p=0.001</p> <p>Adjusted OR (95% CI) of low physical activity: 2.07 (1.19 to 3.60); p=0.010</p> | ---             |

|                                                               |                                             |                                                                                                   |                                                                                                                                                                                                                                                                                                                                                                                                                                                                                                                                                                                                                                                                                                                                                     |
|---------------------------------------------------------------|---------------------------------------------|---------------------------------------------------------------------------------------------------|-----------------------------------------------------------------------------------------------------------------------------------------------------------------------------------------------------------------------------------------------------------------------------------------------------------------------------------------------------------------------------------------------------------------------------------------------------------------------------------------------------------------------------------------------------------------------------------------------------------------------------------------------------------------------------------------------------------------------------------------------------|
|                                                               | Time using LTOT                             | ---                                                                                               | <p>N (%) &lt;1 month: 4 (8) in low energy expenditure (0-53 kcal/d); 5 (17) in moderate (54-210 kcal/d); 3 (11) in high (&gt;210 kcal/d)</p> <p>N (%) 1-5.9 months: 5 (10) in low energy expenditure (0-53 kcal/d); 4 (14) in moderate (54-210 kcal/d); 3 (11) in high (&gt;210 kcal/d)</p> <p>N (%) 6 months-1.9 yr: 13 (25) in low energy expenditure (0-53 kcal/d); 3 (10) in moderate (54-210 kcal/d); 7 (26) in high (&gt;210 kcal/d)</p> <p>N (%) 2-3.9 yr: 13 (25) in low energy expenditure (0-53 kcal/d); 3 (10) in moderate (54-210 kcal/d); 6 (22) in high (&gt;210 kcal/d)</p> <p>N (%) ≥4 yr: 16 (31) in low energy expenditure (0-53 kcal/d); 14 (48) in moderate (54-210 kcal/d); 8 (30) in high (&gt;210 kcal/d)</p> <p>p=0.436</p> |
| Garcia-Rio, F. 2009, Am J Respir Crit Care Med <sup>S34</sup> | Long term oxygen therapy (LTOT) utilization | ---                                                                                               | <p>N (%): 4 (15) in quartile 1 (Q1) of physical activity; 4 (14) in Q2; 2 (7) in Q3; 0 (0) in Q4; p=0.19</p>                                                                                                                                                                                                                                                                                                                                                                                                                                                                                                                                                                                                                                        |
| Okubadejo, AA. 1997, Eur Respir J <sup>S54</sup>              | LTOT group vs. no LTOT group                | Median (P <sub>25</sub> -P <sub>75</sub> ) Nottingham EADL score: 10 (2-20) vs. 17 (6-22); p=0.01 | ---                                                                                                                                                                                                                                                                                                                                                                                                                                                                                                                                                                                                                                                                                                                                                 |
| Sandland, C.J. 2008, Chest <sup>S63</sup>                     | Before vs. after intervention               | ---                                                                                               | <p>In oxygen group, mean (SD) domestic activity counts: 4694 (1902) vs. 6912 (4171); p=0.46</p> <p>In air group, mean (SD) domestic activity counts: 6430 (5002) vs. 6000 (3808); p=ns</p>                                                                                                                                                                                                                                                                                                                                                                                                                                                                                                                                                          |
| Tsara, V. 2008, Respir Care <sup>S72</sup>                    | LTOT group vs. no LTOT group                | Mean (SD) ADL score: 74.5 (37.3) vs. 97.4 (2.0); p=0.001                                          | ---                                                                                                                                                                                                                                                                                                                                                                                                                                                                                                                                                                                                                                                                                                                                                 |

|                                                |                                                                                             |                                                                                                              |                                                                                                                                                    |
|------------------------------------------------|---------------------------------------------------------------------------------------------|--------------------------------------------------------------------------------------------------------------|----------------------------------------------------------------------------------------------------------------------------------------------------|
| Vergeret, J. 1989, Eur Respir J <sup>S75</sup> | Fixed O <sub>2</sub> group vs. Portable O <sub>2</sub> group                                | Mean (SD) walked outdoors (m/day): 520 (370) vs. 480(397); p<0.05                                            | ---                                                                                                                                                |
|                                                | Fixed O <sub>2</sub> group vs. Portable O <sub>2</sub> group (in oxygen therapy <15 h/day)  | ---                                                                                                          | Mean rest time (h/day): 13 vs. 14; p=ns<br>Mean outdoor activity (h/day): 2 vs. 2; p=ns<br>Mean distance walked outdoor (m/day): 658 vs. 432; p=ns |
|                                                | Fixed O <sub>2</sub> group vs. Portable O <sub>2</sub> group (in oxygen therapy > 18 h/day) | Mean outdoor activity (h/day): 0.1 vs. 2; p<0.05<br>Mean distance walked outdoor (m/day): 20 vs. 385; p<0.01 | Mean rest time (h/day): 15 vs. 14; p=ns                                                                                                            |

#### **Determinant: Intervention – Physical activity advice**

| Paper                                                            | Variable / Category                                                           | Association                                                                                                                                                                                                                                                                                                          |                                                                                        |
|------------------------------------------------------------------|-------------------------------------------------------------------------------|----------------------------------------------------------------------------------------------------------------------------------------------------------------------------------------------------------------------------------------------------------------------------------------------------------------------|----------------------------------------------------------------------------------------|
|                                                                  |                                                                               | Significant                                                                                                                                                                                                                                                                                                          | Non-significant                                                                        |
| de Blok, BMJ. 2006, Patient Educ Couns <sup>S19</sup>            | Physical activity counselling with pedometer group vs. control group          | ---                                                                                                                                                                                                                                                                                                                  | Mean steps/day at follow-up: 3927 in intervention group, 3554 in control group, p=0.38 |
| Nguyen, HQ. 2009, Int J Chron Obstruct Pulmon Dis <sup>S51</sup> | MOBILE self-monitored (control group) vs. MOBILE coached (intervention group) | Mean (SE) total steps/day: 5229 (1068) at baseline, 4452 (1082) at 3 months, and 5838 (1096) at 6 months, in MOBILE-self monitored vs. 6692 (1007) at baseline, 5879(1016) at 3 months, and 5675 (1007) at 6 months, in MOBILE-coached; p group x time interaction=0.04;<br>Mean (SE) % active time at moderate-high | ---                                                                                    |

|                                            |                                       |                                                                                                                                                                                                                                                                                                                                                                                                                                                                                                                                                                                   |                                                                                                                                                                                                                                                                                             |
|--------------------------------------------|---------------------------------------|-----------------------------------------------------------------------------------------------------------------------------------------------------------------------------------------------------------------------------------------------------------------------------------------------------------------------------------------------------------------------------------------------------------------------------------------------------------------------------------------------------------------------------------------------------------------------------------|---------------------------------------------------------------------------------------------------------------------------------------------------------------------------------------------------------------------------------------------------------------------------------------------|
|                                            |                                       | <p>activity: 19.1 (2.7) at baseline, 18.6 (2.8) at 3 months, and 23.5 (2.9) at 6 months, in MOBILE-self monitored vs. 27.1 (2.6) at baseline, 24.2 (2.6) at 3 months, and 23.6(2.6) at 6 months, in MOBILE-coached; p group x time interaction=0.003;</p> <p>Mean (SE) total average steps/minute of the best 30 minutes of the day: 61.2 (5.4) at baseline, 59.0 (5.6) at 3 months, and 68.2 (5.8) at 6 months, in MOBILE-self monitored vs. 68.4 (5.0) at baseline, 59.0 (5.2) at 3 months, and 56.6 (5.0) at 6 months, in MOBILE-coached; p group x time interaction=0.002</p> |                                                                                                                                                                                                                                                                                             |
| Wewel, AR. 2008, Respir Med <sup>S85</sup> | Baseline period vs. phone call period | <p>Mean (SD) total activity (counts): 192614 (127247) vs. 235489 (116953); p=0.017</p> <p>Mean (SD) activity per hour of monitoring (counts/h): 1061 (636) vs. 1330 (726); p=0.007</p>                                                                                                                                                                                                                                                                                                                                                                                            | <p>Mean (SD) total activity without training sessions (counts): 192614 (127247) vs. 194476 (103389); p=0.433</p> <p>Mean (SD) total pedometer reading (m): 31215 (23673) vs. 37186 (20341); p=0.079</p> <p>Mean (SD) pedometer reading per hour (m/h): 184 (119) vs. 214 (121); p=0.140</p> |

### **Determinant: Marital status**

| Paper                                                         | Variable / Category | Association |                                                                                                                                    |
|---------------------------------------------------------------|---------------------|-------------|------------------------------------------------------------------------------------------------------------------------------------|
|                                                               |                     | Significant | Non-significant                                                                                                                    |
| Garcia-Aymerich, J. 2004, Med Sci Sports Exerc <sup>S30</sup> | Married             | ---         | N (%) 74 (67) in low energy expenditure (0-53 kcal/d); 77 (76) in moderate (54-210 kcal/d); 88 (77) in high (>210 kcal/d); p=0.172 |



|                                                |         |                                                                                                                                              |     |
|------------------------------------------------|---------|----------------------------------------------------------------------------------------------------------------------------------------------|-----|
| Garcia-Aymerich, J. 2009, Chest <sup>S33</sup> | Married | N (%): 75 (88) in quartile 1 (Q1) of energy expenditure in physical activity; 73 (86) in Q2; 62 (73) in Q3; 64 (74) in Q4; p for trend=0.005 | --- |
|------------------------------------------------|---------|----------------------------------------------------------------------------------------------------------------------------------------------|-----|

### **Determinant: Osteoarticular condition**

| Paper                                                         | Variable / Category     | Association                                                                                                                                                                                                   |                                                                                                                                    |
|---------------------------------------------------------------|-------------------------|---------------------------------------------------------------------------------------------------------------------------------------------------------------------------------------------------------------|------------------------------------------------------------------------------------------------------------------------------------|
|                                                               |                         | Significant                                                                                                                                                                                                   | Non-significant                                                                                                                    |
| Garcia-Aymerich, J. 2004, Med Sci Sports Exerc <sup>S30</sup> | Arthrosis or rheumatism | ---                                                                                                                                                                                                           | N (%): 45 (41) in low energy expenditure (0-53 kcal/d); 33 (33) in moderate (54-210 kcal/d); 47 (4) in high (>210 kcal/d); p=0.385 |
| Moy, ML. 2009, J Rehabil Res Dev <sup>S49</sup>               | Joint problems          | Unadjusted coefficient (95% CI): -2742 (-3723 to -1761) for steps per day; p=0.0002<br><br>Unadjusted coefficient (95% CI): -1.1 (-2.2 to -0.083) for number of checklist physical activity performed; p=0.04 | ---                                                                                                                                |

### **Determinant: Quality of Life / Health Related Quality of Life**

| Paper                                         | Variable / Category | Association                                                                               |                 |
|-----------------------------------------------|---------------------|-------------------------------------------------------------------------------------------|-----------------|
|                                               |                     | Significant                                                                               | Non-significant |
| Altenburg, WA. 2013, Respir Med <sup>S1</sup> | SGRQ activity       | Adjusted regression standardized coefficient: -0.275 for daily physical activity; p=0.006 | ---             |

|                                                               |                         |                                                                                                                                                                                                                           |     |
|---------------------------------------------------------------|-------------------------|---------------------------------------------------------------------------------------------------------------------------------------------------------------------------------------------------------------------------|-----|
| Garcia-Aymerich, J. 2004, Med Sci Sports Exerc <sup>S30</sup> | SF-12 physical summary  | Mean (SD): 33 (7) in low energy expenditure (0-53 kcal/d); 37 (9) in moderate (54-210 kcal/d); 39 (10) in high (>210 kcal/d); p<0.001<br><br>Adjusted OR (95% CI) of low physical activity: 0.93 (0.90 to 0.96); p<0.001  | --- |
|                                                               | SF-12 mental summary    | Mean (SD): 42 (12) in low energy expenditure (0-53 kcal/d); 47 (11) in moderate (54-210 kcal/d); 49 (10) in high (>210 kcal/d); p<0.001<br><br>Adjusted OR(95% CI) of low physical activity: 0.96 (0.93 to 0.98); p<0.001 | --- |
| Garcia-Rio, F. 2009, Am J Respir Crit Care Med <sup>S34</sup> | SGRQ symptoms           | Mean (SD): 50.8 (22.2) in quartile 1 (Q1) of physical activity; 44.5 (21.3) in Q2; 29.4 (16.9) in Q3; 31.6 (14.9) in Q4; p=0.001                                                                                          | --- |
|                                                               | SGRQ activity           | Mean (SD): 62.2 (18.4) in quartile 1 (Q1) of physical activity; 49.7 (17.7) in Q2; 47.9 (17.2) in Q3; 39.0 (14.6) in Q4; p=0.001                                                                                          | --- |
|                                                               | SGRQ impact             | Mean (SD): 51.3 (17.9) in quartile 1 (Q1) of physical activity; 29.4 (16.3) in Q2; 24.8 (15.0) in Q3; 30.8 (18.8) in Q4; p=0.001                                                                                          | --- |
|                                                               | SGRQ total score        | Mean (SD): 54.5 (17.5) in quartile 1 (Q1) of physical activity; 38.1 (16.3) in Q2; 33.6 (12.5) in Q3; 34.4 (13.2) in Q4; p=0.001                                                                                          | --- |
| Moy, ML. 2009, J Rehabil                                      | VR-36 physical function | Unadjusted coefficient (95% CI): 29 (12 to 47) for steps per day; p=0.002                                                                                                                                                 | --- |

|                                               |                        |                                                                               |                                                                                                                   |
|-----------------------------------------------|------------------------|-------------------------------------------------------------------------------|-------------------------------------------------------------------------------------------------------------------|
| Res Dev <sup>S49</sup>                        | SF-36 physical summary | Unadjusted coefficient (95% CI): 67 (35 to 99) for steps per day; p=0.0003    | ---                                                                                                               |
|                                               | SF-36 mental summary   | Unadjusted coefficient (95% CI): -72 (-125 to -19) for steps per day; p=0.002 | ---                                                                                                               |
| Pitta, F. 2006, J Bras Pneumol <sup>S57</sup> | CRDQ total             | ---                                                                           | Median (P <sub>25</sub> -P <sub>75</sub> ): 82 (63-88) in active group vs. 87 (65-104) in inactive group; p=0.399 |

#### **Determinant: Self-efficacy**

| Paper                                                 | Variable / Category                         | Association                                                                            |                 |
|-------------------------------------------------------|---------------------------------------------|----------------------------------------------------------------------------------------|-----------------|
|                                                       |                                             | Significant                                                                            | Non-significant |
| Altenburg, WA. 2013, Respir Med <sup>S1</sup>         | PPAS (Perceived Physical Ability Subscale)  | Adjusted standardized coefficient: 0.400 for daily physical activity; p=0.000          | ---             |
| Hartman, JE. 2013, Arch Phys Med Rehab <sup>S37</sup> | LIVAS (Self-efficacy for physical activity) | Adjusted regression coefficient (SE): 0.096 (0.034) for percentage locomotion; p=0.006 | ---             |

#### **Determinant: Sex**

| Paper | Variable / Category | Association |                 |
|-------|---------------------|-------------|-----------------|
|       |                     | Significant | Non-significant |

|                                                               |        |                                                                                                                                             |                                                                                                             |
|---------------------------------------------------------------|--------|---------------------------------------------------------------------------------------------------------------------------------------------|-------------------------------------------------------------------------------------------------------------|
| Garcia-Aymerich, J. 2004, Med Sci Sports Exerc <sup>S30</sup> | Male   | N (%) 94 (85%) in low energy expenditure (0-53 kcal/d); 95 (94%) in moderate (54-210 kcal/d); 110 (95%) in high (>210 kcal/d); p=0.007      | ---                                                                                                         |
|                                                               | Female | Adjusted OR (95% CI) of low physical activity: 2.92 (1.11 to 7.70); p=0.031                                                                 | ---                                                                                                         |
| Garcia-Aymerich, J. 2009, Chest <sup>S33</sup>                | Male   | N (%) 83 (98) in quartile 1 (Q1) of energy expenditure in physical activity; 81 (95) in Q2; 75 (88) in Q3; 78 (91) in Q4; p for trend=0.025 | ---                                                                                                         |
| Garcia-Rio, F. 2009, Am J Respir Crit Care Med <sup>S34</sup> | Male   | ---                                                                                                                                         | N (%) 26 (96) in quartile 1 (Q1) of physical activity; 26 (93) in Q2; 25 (89) in Q3; 27 (100) in Q4; p=0.34 |
| Pitta, F. 2006, J Bras Pneumol <sup>S57</sup>                 | Male   |                                                                                                                                             | N (%) 8 (50) male in active group vs. 8 (50) male in inactive group; p=na                                   |
|                                                               | Female |                                                                                                                                             | N (%) 4 (57) female in active group vs. 3 (43) female in inactive group; p=na                               |
| Skumlien, S. 2006, Chron Respir Dis <sup>S68</sup>            | Sex    | Mean (SD) activity score in home management: 3.9 (2.6) in men vs. 4.8 (2.2) in women; p<0.05                                                | ---                                                                                                         |
| Watz, H. 2008, Am J Respir Crit Care Med <sup>S81</sup>       | Male   | ---                                                                                                                                         | N (%) 25 (74) in GOLD I; 41 (72) in GOLD II; 35 (81) in GOLD III and 27 (75) in GOLD IV; p=0.74             |
|                                                               | Female | ---                                                                                                                                         | Unstandardized regression coefficient (95% CI) 0.065 (-0.027 to 0.157) for physical activity level; p=0.16; |

### **Determinant: Smoking habit**

| Paper                                                         | Variable / Category                     | Association                                                                                                                                                                                                                                                                                             |                                                                                                              |
|---------------------------------------------------------------|-----------------------------------------|---------------------------------------------------------------------------------------------------------------------------------------------------------------------------------------------------------------------------------------------------------------------------------------------------------|--------------------------------------------------------------------------------------------------------------|
|                                                               |                                         | Significant                                                                                                                                                                                                                                                                                             | Non-significant                                                                                              |
| Garcia-Aymerich, J. 2004, Med Sci Sports Exerc <sup>S30</sup> | Ex-smoker, current smoker, never smoker | N (%): 70 (65) ex-smoker, 23 (21) current smoker, 15 (14) never smoker in low energy expenditure (0-53 kcal/d); 71 (71) ex-smoker, 25 (25) current smoker, 4 (4) never smoker in moderate (54-210 kcal/d); 74 (65) ex-smoker, 34 (30) current smoker, 6 (5) never smoker in high (>210 kcal/d); p=0.041 | ---                                                                                                          |
| Garcia-Aymerich, J. 2009, Chest <sup>S33</sup>                | Current smoker                          | N (%): 24 (28) in quartile 1 (Q1) of energy expenditure in physical activity; 28 (33) in Q2; 39 (46) in Q3; 54 (63) in Q4; p for trend=0.007                                                                                                                                                            | ---                                                                                                          |
| Garcia-Rio, F. 2009, Am J Respir Crit Care Med <sup>S34</sup> | Current smoker                          | ---                                                                                                                                                                                                                                                                                                     | N (%): 5 (20) in quartile 1 (Q1) of physical activity; 6 (23) in Q2; 5 (19) in Q3; 4 (16) in Q4; p=0.74      |
|                                                               | Pack-years                              | ---                                                                                                                                                                                                                                                                                                     | Mean (SD): 83 (89) quartile 1 (Q1) of physical activity; 49 (12) in Q2; 48 (29) in Q3; 53 (16) in Q4; p=0.21 |

### **Determinant: Socioeconomic status**

| Paper                     | Variable / Category      | Association                                                                                     |                 |
|---------------------------|--------------------------|-------------------------------------------------------------------------------------------------|-----------------|
|                           |                          | Significant                                                                                     | Non-significant |
| Garcia-Aymerich, J. 2004, | Low socioeconomic status | N (%): 70 (63) in low energy expenditure (0-53 kcal/d); 73 (72) in moderate (54-210 kcal/d); 94 | ---             |

|                                                |                                            |                                                                             |                                                                                                                                              |
|------------------------------------------------|--------------------------------------------|-----------------------------------------------------------------------------|----------------------------------------------------------------------------------------------------------------------------------------------|
| Med Sci Sports Exerc <sup>S30</sup>            | (grade IV or V)                            | (81) in high (>210 kcal/d); p=0.007                                         |                                                                                                                                              |
|                                                | High socioeconomic status (grade I to III) | Adjusted OR (95% CI) of low physical activity: 2.23 (1.24 to 4.02); p=0.007 | ---                                                                                                                                          |
| Garcia-Aymerich, J. 2009, Chest <sup>S33</sup> | Low socioeconomic status (grade IV or V)   | ---                                                                         | N (%): 68 (83) in quartile 1 (Q1) of energy expenditure in physical activity; 64 (83) in Q2; 64 (80) in Q3; 62 (81) in Q4; p for trend=0.595 |

### **Determinant: Systemic inflammation**

| Paper                                                         | Variable / Category                      | Association                                                                                                                                                                                                                       |                                                                                                     |
|---------------------------------------------------------------|------------------------------------------|-----------------------------------------------------------------------------------------------------------------------------------------------------------------------------------------------------------------------------------|-----------------------------------------------------------------------------------------------------|
|                                                               |                                          | Significant                                                                                                                                                                                                                       | Non-significant                                                                                     |
| Garcia-Rio, F. 2009, Am J Respir Crit Care Med <sup>S34</sup> | IL-6 (pg/ml)                             | Mean (SD): 2.1 (3.3) in quartile 1 (Q1) of physical activity; 6.3 (7.8) in Q2; 1.9 (3.2) in Q3; 1.7 (2.5) in Q4; p=0.04;                                                                                                          | ---                                                                                                 |
|                                                               | 8-isoprostane (pg/ml)                    | Mean (SD): 58.9 (20.3) in quartile 1 (Q1); 45.6 (23.8) in Q2; 33.6 (23.0) in Q3; 11.1 (7.1) in Q4; p=0.001                                                                                                                        | ---                                                                                                 |
|                                                               | soluble TNF- $\alpha$ receptor 1 (pg/ml) | ---                                                                                                                                                                                                                               | Mean (SD): 4.0 (5.4) in quartile 1 (Q1); 4.4 (10.4) in Q2; 1.0 (1.0) in Q3; 3.2 (4.7) in Q4; p=0.59 |
| Watz, H. 2008, Am J Respir Crit Care Med <sup>S81</sup>       | Fibrinogen (mg/dl)                       | Adjusted unstandardized regression coefficient (95% CI): -0.001 (-0.001 to <0.000) for physical activity level; p=0.001<br><br>Adjusted unstandardized regression coefficient (95% CI): -7 (-12 to -2) for steps per day; p=0.006 | ---                                                                                                 |

**Determinant: Working status**

| Paper                                                         | Variable / Category   | Association                                                                                                                               |                                                                                                                               |
|---------------------------------------------------------------|-----------------------|-------------------------------------------------------------------------------------------------------------------------------------------|-------------------------------------------------------------------------------------------------------------------------------|
|                                                               |                       | Significant                                                                                                                               | Non-significant                                                                                                               |
| Garcia-Aymerich, J. 2004, Med Sci Sports Exerc <sup>S30</sup> | Current workers       | ---                                                                                                                                       | N (%): 6 (5) in low energy expenditure (0-53 kcal/d); 7 (7) in moderate (54-210 kcal/d); 7 (6) in high (>210 kcal/d); p=0.898 |
| Garcia-Aymerich, J. 2009, Chest <sup>S33</sup>                | Occupationally active | N (%): 0 (0) in quartile 1 (Q1) of energy expenditure in physical activity; 5 (6) in Q2; 17 (20) in Q3; 39 (46) in Q4; p for trend<0.001. | ---                                                                                                                           |
| Garcia-Rio, F. 2009, Am J Respir Crit Care Med <sup>S34</sup> | Retired or disabled   | ---                                                                                                                                       | N (%): 20 (74) in quartile 1 (Q1) of physical activity; 13 (46) in Q2; 14 (50) in Q3; 12 (44) in Q4; p=0.10                   |

Online supplement Table 3b. Other potential determinants (only evidenced in 1 study) and their association with physical activity, grouped in main categories and sorted by alphabetical order.

**Determinant: Cardiac autonomic function**

| Paper                                      | Variable / Category      | Association                                              |                 |
|--------------------------------------------|--------------------------|----------------------------------------------------------|-----------------|
|                                            |                          | Significant                                              | Non-significant |
| van Gestel, AJR. 2012, COPD <sup>S73</sup> | RR interval (ms)         | Unadjusted coefficient: 0.42 for steps per day; p=0.001  | ---             |
|                                            | HR at rest (bpm)         | Unadjusted coefficient: -0.29 for steps per day; p=0.010 | ---             |
|                                            | Heart Rate Reserve (bpm) | Unadjusted coefficient: 0.28 for steps per day; p=0.015  | ---             |

**Determinant: Caregivers**

| Paper                                                 | Variable / Category                       | Association                                                                     |                 |
|-------------------------------------------------------|-------------------------------------------|---------------------------------------------------------------------------------|-----------------|
|                                                       |                                           | Significant                                                                     | Non-significant |
| Wakabayashi, R. 2011, J Am Geriatr Soc <sup>S78</sup> | Living alone vs. Living with 1 caregiver  | Mean (SD) in instrumental ADLs (range 0-31): 29.1 (3.6) vs. 25.6 (3.9); p<0.001 | ---             |
|                                                       | Living alone vs. Living with ≥2 caregiver | Mean (SD) in instrumental ADLs (range 0-31): 29.1 (3.6) vs. 25.6 (4.2); p<0.001 | ---             |



|  |                                                                       |                                                                                    |                                                                                  |
|--|-----------------------------------------------------------------------|------------------------------------------------------------------------------------|----------------------------------------------------------------------------------|
|  | Living with 1 caregiver vs. Living with ≥2 caregiver                  | ---                                                                                | Mean (SD) in instrumental ADLs (range 0-31): 25.6 (3.9) vs. 25.6 (4.2); p>0.99   |
|  | Living alone vs. Living with 1 caregiver vs. Living with ≥2 caregiver | Mean (SD) in ADLs (range 0-31): 29.1 (3.6) vs. 25.6 (3.9) vs. 29.1 (3.6); p <0.001 | Mean (SD) in ADLs (range 0-20): 19.9 (0.5) vs. 20.0 (0.3) vs. 19.9 (0.8); p=0.79 |

### **Determinant: Cataracts**

| Paper                                                         | Variable / Category | Association |                                                                                                                                     |
|---------------------------------------------------------------|---------------------|-------------|-------------------------------------------------------------------------------------------------------------------------------------|
|                                                               |                     | Significant | Non-significant                                                                                                                     |
| Garcia-Aymerich, J. 2004, Med Sci Sports Exerc <sup>S30</sup> | Cataracts           | ---         | N (%): 43 (39) in low energy expenditure (0-53 kcal/d); 29 (29) in moderate (54-210 kcal/d); 26 (23) in high (>210 kcal/d); p=0.053 |

### **Determinant: Diabetes**

| Paper                                                         | Variable / Category | Association                                                                                                                                                                                                            |                 |
|---------------------------------------------------------------|---------------------|------------------------------------------------------------------------------------------------------------------------------------------------------------------------------------------------------------------------|-----------------|
|                                                               |                     | Significant                                                                                                                                                                                                            | Non-significant |
| Garcia-Aymerich, J. 2004, Med Sci Sports Exerc <sup>S30</sup> | Diabetes            | N (%): 32 (29) in low energy expenditure (0-53 kcal/d); 18 (18) in moderate (54-210 kcal/d); 15 (13) in high (>210 kcal/d); p=0.010<br><br>Adjusted OR (95% CI) of low physical activity: 2.66 (1.40 to 5.06); p=0.003 | ---             |

**Determinant: Disease control**

| Paper                                                         | Variable / Category                              | Association |                                                                                                                                     |
|---------------------------------------------------------------|--------------------------------------------------|-------------|-------------------------------------------------------------------------------------------------------------------------------------|
|                                                               |                                                  | Significant | Non-significant                                                                                                                     |
| Garcia-Aymerich, J. 2004, Med Sci Sports Exerc <sup>S30</sup> | ≥3 visits per year to control the disease        | ---         | N (%): 44 (43) in low energy expenditure (0-53 kcal/d); 30 (32) in moderate (54-210 kcal/d); 36 (33) in high (>210 kcal/d); p=0.167 |
|                                                               | Correctly performed essential inhaler manoeuvres | ---         | N (%): 54 (53) in low energy expenditure (0-53 kcal/d); 49 (57) in moderate (54-210 kcal/d); 53 (56) in high (>210 kcal/d); p=0.830 |

**Determinant: Intervention – Integrated education**

| Paper                                                 | Variable / Category                                                                 | Association                                                                                                                                    |                 |
|-------------------------------------------------------|-------------------------------------------------------------------------------------|------------------------------------------------------------------------------------------------------------------------------------------------|-----------------|
|                                                       |                                                                                     | Significant                                                                                                                                    | Non-significant |
| Wakabayashi, R. 2011, Geriatr Gerontol <sup>S77</sup> | Integrated education group vs. Usual care group (baseline, 6 months, and 12 months) | Mean (SD) instrumental activities of daily living: 26 (4), 27 (4), and 27 (4) vs. 27 (4), 26 (4), and 27 (4); p group x time interaction=0.030 | ---             |

**Determinant: Intervention - Lung volume reduction surgery**

| Paper | Variable / Category | Association |                 |
|-------|---------------------|-------------|-----------------|
|       |                     | Significant | Non-significant |

|                                                  |                                      |                                                                                                                                                                                                                                                                                                                                                         |                                                                                                                                                                                                                                                                                                                                                                                                                                                                                                                                                                                                                                                                                                                                                                                                                                                                                                                                                                                                                                                                                                                                                                                                                                                                  |
|--------------------------------------------------|--------------------------------------|---------------------------------------------------------------------------------------------------------------------------------------------------------------------------------------------------------------------------------------------------------------------------------------------------------------------------------------------------------|------------------------------------------------------------------------------------------------------------------------------------------------------------------------------------------------------------------------------------------------------------------------------------------------------------------------------------------------------------------------------------------------------------------------------------------------------------------------------------------------------------------------------------------------------------------------------------------------------------------------------------------------------------------------------------------------------------------------------------------------------------------------------------------------------------------------------------------------------------------------------------------------------------------------------------------------------------------------------------------------------------------------------------------------------------------------------------------------------------------------------------------------------------------------------------------------------------------------------------------------------------------|
| <p>Goto, Y. 2004, Respiriology<sup>S36</sup></p> | <p>LVRs group vs. non-LVRs group</p> | <p>Mean in bathing score at 3 months 0.54 in LVRs group vs. 1.64 in non-LVRs group, <math>p&lt;0.005</math></p> <p>Mean in indoor walking score at 3 months 0.25 in LVRs group vs. 0.73 in non-LVRs group, <math>p&lt;0.005</math></p> <p>Mean in bathing score at 12 months 0.53 in LVRs group vs. 1.50 in non-LVRs group, <math>p&lt;0.005</math></p> | <p>Mean in eating score at 3 months 0.15 in LVRs group vs. 0.18 in non-LVRs group; <math>p=ns</math></p> <p>Mean in toileting score at 3 months 0.23 in LVRs group vs. 0.27 in non-LVRs group; <math>p=ns</math></p> <p>Mean in shampooing score at 3 months 0.62 in LVRs group vs. 1.10 in non-LVRs group; <math>p=ns</math></p> <p>Mean in face and teeth washing score at 3 months 0.39 in LVRs group vs. 0.73 in non-LVRs group; <math>p=ns</math></p> <p>Mean in dressing score at 3 months 0.54 in LVRs group vs. 0.55 in non-LVRs group; <math>p=ns</math></p> <p>Mean in eating score at 12 months 0.22 in LVRs group vs. 0.42 in non-LVRs group; <math>p=ns</math></p> <p>Mean in toileting score at 12 months 0.44 in LVRs group vs. 0.50 in non-LVRs group; <math>p=ns</math></p> <p>Mean in shampooing score at 12 months 0.83 in LVRs group vs. 1.42 in non-LVRs group; <math>p=ns</math></p> <p>Mean in face and teeth washing score at 3 months 0.56 in LVRs group vs. 0.92 in non-LVRs group; <math>p=ns</math></p> <p>Mean in dressing score at 12 months 0.56 in LVRs group vs. 1.17 in non-LVRs group; <math>p=ns</math></p> <p>Mean in indoor walking score at 3 months 0.39 in LVRs group vs. 1.17 in non-LVRs group, <math>p=ns</math></p> |
|--------------------------------------------------|--------------------------------------|---------------------------------------------------------------------------------------------------------------------------------------------------------------------------------------------------------------------------------------------------------------------------------------------------------------------------------------------------------|------------------------------------------------------------------------------------------------------------------------------------------------------------------------------------------------------------------------------------------------------------------------------------------------------------------------------------------------------------------------------------------------------------------------------------------------------------------------------------------------------------------------------------------------------------------------------------------------------------------------------------------------------------------------------------------------------------------------------------------------------------------------------------------------------------------------------------------------------------------------------------------------------------------------------------------------------------------------------------------------------------------------------------------------------------------------------------------------------------------------------------------------------------------------------------------------------------------------------------------------------------------|

### **Determinant: Intervention - Lung transplant**

| Paper                                                        | Variable / Category                                       | Association                                                                                                                                                                                        |                 |
|--------------------------------------------------------------|-----------------------------------------------------------|----------------------------------------------------------------------------------------------------------------------------------------------------------------------------------------------------|-----------------|
|                                                              |                                                           | Significant                                                                                                                                                                                        | Non-significant |
| Bossenbroek, L. 2009, J Heart Lung Transplant <sup>S10</sup> | Lung transplant candidates vs. Lung transplant recipients | Mean (SD) steps/day: 1407 (1166) vs. 6642 (2886); p<0.001<br>Mean (SD) step equivalents/day: 2636 (2275) vs. 9038 (4583); p<0.001<br>Mean (SD) SQUASH MET/day: 1349 (990) vs. 5434 (2945); p<0.001 | ---             |

### **Determinant: Muscle strength**

| Paper                                         | Variable / Category | Association |                                                                                                                   |
|-----------------------------------------------|---------------------|-------------|-------------------------------------------------------------------------------------------------------------------|
|                                               |                     | Significant | Non-significant                                                                                                   |
| Pitta, F. 2006, J Bras Pneumol <sup>S57</sup> | Plmax (% pred)      | ---         | Median (P <sub>25</sub> -P <sub>75</sub> ): 66 (48-88) in active group vs. 74 (62-102) in inactive group; 0.644   |
|                                               | PEmax (% pred)      | ---         | Median (P <sub>25</sub> -P <sub>75</sub> ): 101 (89-109) in active group vs. 78 (67-121) in inactive group; 0.132 |
|                                               | QF (% pred)         | ---         | Median (P <sub>25</sub> -P <sub>75</sub> ): 75 (54-87) in active group vs. 76 (58-97) in inactive group; 0.806    |

**Determinant: Other lung function measures (not FEV<sub>1</sub>, not FVC, not hyperinflation)**

| Paper                                                         | Variable / Category           | Association                                                                                                                                                                                                                                                                  |                                                                                                                               |
|---------------------------------------------------------------|-------------------------------|------------------------------------------------------------------------------------------------------------------------------------------------------------------------------------------------------------------------------------------------------------------------------|-------------------------------------------------------------------------------------------------------------------------------|
|                                                               |                               | Significant                                                                                                                                                                                                                                                                  | Non-significant                                                                                                               |
| Garcia-Rio, F. 2009, Am J Respir Crit Care Med <sup>S34</sup> | postPBD FEV <sub>1</sub> /FVC | ---                                                                                                                                                                                                                                                                          | Mean (SD): 48 (13) in quartile (Q1) quartile 1 (Q1) of physical activity; 49 (11) in Q2; 49 (12) in Q3; 55 (11) in Q4; p=0.15 |
|                                                               | FRC (% pred)                  | Mean (SD): 143 (25) in quartile (Q1) quartile 1 (Q1) of physical activity; 144 (42) in Q2; 130 (22) in Q3; 114 (28) in Q4; p=0.002                                                                                                                                           | ---                                                                                                                           |
| Pitta, F. 2006, J Bras Pneumol <sup>S57</sup>                 | VE/MVV                        | ---                                                                                                                                                                                                                                                                          | Median (P25-P75): 100 (85-114) in active group vsvs. 83 (64-105) in inactive group; p=0.178                                   |
| Pitta, F. 2008, Respir Med <sup>S58</sup>                     | MVV (l)                       | Correlation coefficients (95% CI) of 0.48 (0.18 to 0.69) with EEA>3METs, p<0.001; 0.49 (0.20 to 0.70) with steps/day, p<0.001; -0.41 (-0.65 to 0.10) with sedentary activities, p<0.001; 0.42 (0.11 to 0.66) with moderate activities, p<0.001; 0.49 (0.20 to 0.71), p<0.001 | ---                                                                                                                           |

**Determinant: Season**

| Paper                                                     | Variable / Category | Association                                                            |                 |
|-----------------------------------------------------------|---------------------|------------------------------------------------------------------------|-----------------|
|                                                           |                     | Significant                                                            | Non-significant |
| Sewell, L. 2010, J Cardiopulmon Rehab Prev <sup>S66</sup> | Summer vs. Winter   | Mean (SD) activity monitor counts: 8857 (7497) vs. 3201 (2637); p=0.01 | ---             |

Online supplement Table 4a. Outcomes covered by at least 2 articles and their association with physical activity, grouped in main categories and sorted by alphabetical order.

**Outcome: Balance**

| Paper                                    | Variable      | Association                                                                                                                                                                          |                                                                                                  |
|------------------------------------------|---------------|--------------------------------------------------------------------------------------------------------------------------------------------------------------------------------------|--------------------------------------------------------------------------------------------------|
|                                          |               | Significant                                                                                                                                                                          | Non-significant                                                                                  |
| Beauchamp, MK. 2012, Chest <sup>S2</sup> | BESTest score | Correlation coefficient: 0.40 with self-reported physical activity (PASE); p=0.008<br>Standardized regression coefficient: 0.341 for self-reported physical activity (PASE); p=0.033 | ---                                                                                              |
| Roig, M. 2011, Respir Med <sup>S62</sup> | Falls         | ---                                                                                                                                                                                  | Mean (95% CI) in PASE score: 109 (92 to 126) in non-fallers vs. 86 (66 to 106) in fallers; p=0.1 |

**Outcome: Bone mineral density**

| Paper                                                 | Variable             | Association |                                                                                                                                                                                                                                                                           |
|-------------------------------------------------------|----------------------|-------------|---------------------------------------------------------------------------------------------------------------------------------------------------------------------------------------------------------------------------------------------------------------------------|
|                                                       |                      | Significant | Non-significant                                                                                                                                                                                                                                                           |
| Bon, J. 2011, Am J Respir Crit Care Med <sup>S9</sup> | Bone mineral density | ---         | Mean (SD) in leisure score: 2.4 (1.2) in normal group vs. 2.3 (1.1) in osteopenia group vs. 1.9 (1.3) in osteoporosis group; p=ns<br>Mean (SD) in on-the-job score: 1.6 (0.8) in normal group vs. 1.6 (0.8) in osteopenia group vs. 1.1 (0.4) in osteoporosis group; p=ns |
| Silva, DR. 2011, Respir                               | Bone mass (T-score)  | ---         | Median (P <sub>25</sub> -P <sub>75</sub> ) METs (min/week): 720 (0-2520) in osteoporosis group vs. 560 (25-3548)                                                                                                                                                          |

|                     |                        |                                                             |                                                                      |
|---------------------|------------------------|-------------------------------------------------------------|----------------------------------------------------------------------|
| Care <sup>S67</sup> |                        |                                                             | in osteopenia group vs. 1104 (136-17000) in normal bone mass; p=0.24 |
|                     | Femoral-neck (T-score) | Correlation coefficient: 0.378 with total activity; p<0.001 | ---                                                                  |
|                     | Lumbar spine (T-score) | ---                                                         | Correlation coefficient: 0.150 with total activity; p=0.15           |

### **Outcome: Dyspnea**

| Paper                                                | Variable                             | Association                                                                                                                                 |                 |
|------------------------------------------------------|--------------------------------------|---------------------------------------------------------------------------------------------------------------------------------------------|-----------------|
|                                                      |                                      | Significant                                                                                                                                 | Non-significant |
| Garcia-Aymerich, J. 2009, Chest <sup>S33</sup>       | severe dyspnea (mMRC score, 3, 4, 5) | N (%) 52 (62) in quartile 1 (Q1) of energy expenditure in physical activity; 34 (40) in Q2; 28 (33) in Q3; 40 (47) in Q4; p for trend=0.036 | ---             |
| Lemmens, KM. 2008, Patient Educ Couns <sup>S44</sup> | MRC dyspnea                          | Adjusted regression coefficient 0.20 for physical activity; p<0.01                                                                          | ---             |

### **Outcome: Exacerbations**

| Paper                                      | Variable                                     | Association                                                                                                                                                                          |                 |
|--------------------------------------------|----------------------------------------------|--------------------------------------------------------------------------------------------------------------------------------------------------------------------------------------|-----------------|
|                                            |                                              | Significant                                                                                                                                                                          | Non-significant |
| Benzo, RP. 2010, Respiration <sup>S5</sup> | No hospital admission during 12-month period | Mean (SD) self-reported time of physical activity per week (minutes) 109 (62) in patients with no hospital admission during 12-month period vs. 94(65) in patients with at least one | ---             |

|                                                                |                                               |                                                                                                                                                                                                                                                                                                                                                                                                                                                                      |     |
|----------------------------------------------------------------|-----------------------------------------------|----------------------------------------------------------------------------------------------------------------------------------------------------------------------------------------------------------------------------------------------------------------------------------------------------------------------------------------------------------------------------------------------------------------------------------------------------------------------|-----|
|                                                                |                                               | <p>hospital admission during 12-month period; p=0.01</p> <p>Mean self-reported time of <math>\geq 2</math> h of physical activity per week (%): 42 in patients with no hospital admission during 12-month period vs. 30 in patients with at least one hospital admission during 12-month period; p=0.003</p> <p>Adjusted OR (95% CI) of hospitalization: 0.6 (0.41 to 0.88) in self-reported time of <math>\geq 2</math> h of physical activity per week; p=0.01</p> |     |
| Chen, Y. 2006, Western journal nursing research <sup>S14</sup> | Readmission at 14 days                        | Adjusted OR (95% CI) of daily functioning: 0.99 (0.53 to 1.85); p<0.05                                                                                                                                                                                                                                                                                                                                                                                               | --- |
|                                                                | Readmission at 90 days                        | Adjusted OR (95% CI) of daily functioning: 0.56 (0.33 to 0.97); p<0.05                                                                                                                                                                                                                                                                                                                                                                                               | --- |
| Garcia-Aymerich, J. 2003, Thorax <sup>S29</sup>                | Readmission to hospital for COPD exacerbation | <p>Adjusted HR (95% CI): 0.85 (0.59 to 1.24) usual physical activity 79-232 kcal/day; p=0.400; 0.49 (0.31 to 0.79) usual physical activity &gt;232 kcal/day; p=0.003</p> <p>Adjusted HR (95% CI): 0.87 (0.60 to 1.27) usual physical activity 79-232 kcal/day; p=0.469; 0.54 (0.34 to 0.86) usual physical activity &gt;232 kcal/day; p=0.010</p>                                                                                                                    | --- |
| Garcia-Aymerich, J. 2006, Thorax <sup>S31</sup>                | COPD admissions                               | Adjusted IRR (95% CI): 0.72 (0.53 to 0.97) in low/moderate/high physical activity; p=0.033                                                                                                                                                                                                                                                                                                                                                                           | --- |
| Garcia-Aymerich, J. 2008, Ann Epidemiol <sup>S32</sup>         | COPD admissions                               | Weighted IRR (95% CI): 1.10 (0.82 to 1.49) in moderate physical activity; p=0.522; 0.68 (0.47 to 0.99) in high physical activity; p=0.044                                                                                                                                                                                                                                                                                                                            | --- |
| Garcia-Rio, F. 2012,                                           | COPD admissions                               | Adjusted IRR (95% CI): 0.099 (0.033 to 0.293)                                                                                                                                                                                                                                                                                                                                                                                                                        | --- |



|                                       |                                             |                                                                                                                                                                                                            |     |
|---------------------------------------|---------------------------------------------|------------------------------------------------------------------------------------------------------------------------------------------------------------------------------------------------------------|-----|
| Chest <sup>S35</sup>                  |                                             | in quartile 4 (Q4) of physical activity; p<0.0001; 0.529 (0.291 to 0.962) in Q3; p=0.0369; and 0.537 (0.285 to 1.013) in Q2; p=0.0547                                                                      |     |
| Moy, M. 2013, PLoS ONE <sup>S50</sup> | Acute exacerbations                         | Adjusted RR (95% CI): 1.07 (1.003 to 1.15) in mean daily step count (per 1000 step decrease); p=0.04                                                                                                       | --- |
|                                       | COPD-Related hospitalizations               | Adjusted RR (95% CI): 1.24 (1.08 to 1.42) in mean daily step count (per 1000 step decrease); p=0.003                                                                                                       | --- |
| Pitta, F. 2006, Chest <sup>S56</sup>  | Readmission in the year following discharge | Median (P <sub>25</sub> -P <sub>75</sub> ) walking time per day at 1 month 12 (9-27) min/d in patients readmitted in the year following discharge vs. 30 (21-100) min/d in patients not readmitted; p=0.03 | --- |

### **Outcome: Exercise capacity**

| Paper                                 | Variable  | Association                                                                                                                                                                     |                                                                         |
|---------------------------------------|-----------|---------------------------------------------------------------------------------------------------------------------------------------------------------------------------------|-------------------------------------------------------------------------|
|                                       |           | Significant                                                                                                                                                                     | Non-significant                                                         |
| Chao, PW. 2011, COPD <sup>S13</sup>   | 6MWD (ft) | Mean (SD) 1124 (210) in inactive COPD patients vs. 1468 (240) in active COPD patients                                                                                           | ---                                                                     |
| Eliason, G. 2011, COPD <sup>S23</sup> | 6MWD (m)  | Adjusted regression coefficient 0.381 for time spent moderately or vigorously active (MVPA); p=0.01<br>Adjusted regression coefficient 0.333 for mean physical activity; p=0.02 | Adjusted regression coefficient -0.155 for time spent sedentary; p=0.32 |
| Garcia-Aymerich, J. 2009,             | 6MWD (m)  | Mean (SD) 397 (115) in quartile 1 (Q1) of energy expenditure in physical activity; 446 (79)                                                                                     | ---                                                                     |

|                                        |                   |                                                                                                                                                                                                                                                           |     |
|----------------------------------------|-------------------|-----------------------------------------------------------------------------------------------------------------------------------------------------------------------------------------------------------------------------------------------------------|-----|
| Chest <sup>S33</sup>                   |                   | in Q2; 456 (86) in Q3; 467 (85) in Q4; p for trend<0.001<br><br>Adjusted regression coefficient (95% CI) 40.8 (14.4 to 67.2) for Q2 of energy expenditure in physical activity; 41.5 (13.2 to 69.7) for Q3; 44.8 (14.8 to 74.7) for Q4; p for trend=0.006 |     |
|                                        | VO2 peak (mL/min) | Mean (SD) 1043 (235) in quartile 1 (Q1) of energy expenditure in physical activity; 1139 (300) in Q2; 1296 (445) in Q3; 1234 (398) in Q4; p for trend=0.004                                                                                               | --- |
| Waatevik, M. 2012, COPD <sup>S76</sup> | 6MWD (m)          | Adjusted regression coefficient (95% CI) -41.9 (-65.7 to -18.3) for 1-2 hours physical activity per week; and -81.6 (-117.9 to -45.4) for no physical activity per week; p<0.001                                                                          | --- |

#### **Outcome: FEV<sub>1</sub>**

| Paper                                                | Variable                          | Association                                                                                                                                     |                 |
|------------------------------------------------------|-----------------------------------|-------------------------------------------------------------------------------------------------------------------------------------------------|-----------------|
|                                                      |                                   | Significant                                                                                                                                     | Non-significant |
| Garcia-Aymerich, J. 2009, Chest <sup>S33</sup>       | post-BD FEV <sub>1</sub> (% pred) | Mean (SD) 49 (16) in quartile 1 (Q1) of energy expenditure in physical activity; 50 (15) in Q2; 57 (16) in Q3; 54 (17) in Q4; p for trend=0.002 | ---             |
| Lemmens, KM. 2008, Patient Educ Couns <sup>S44</sup> | FEV <sub>1</sub> (% pred)         | Adjusted regression coefficient: 0.17 for physical activity; p<0.05                                                                             | ---             |

### Outcome: Mortality

| Paper                                           | Variable                 | Association                                                                                                                                                                                                                                                                          |                                                                                                                                                                                                                                                                                      |
|-------------------------------------------------|--------------------------|--------------------------------------------------------------------------------------------------------------------------------------------------------------------------------------------------------------------------------------------------------------------------------------|--------------------------------------------------------------------------------------------------------------------------------------------------------------------------------------------------------------------------------------------------------------------------------------|
|                                                 |                          | Significant                                                                                                                                                                                                                                                                          | Non-significant                                                                                                                                                                                                                                                                      |
| Esteban, C. 2006, QJM <sup>S24</sup>            | Deaths                   | N (%) 11 (28) in activity level 0; 25 (22) in activity level 1; 54 (16) in activity level 2; 4 (4) in activity level 3; p=0.0007                                                                                                                                                     | ---                                                                                                                                                                                                                                                                                  |
|                                                 | Mortality                | ---                                                                                                                                                                                                                                                                                  | Adjusted HR: 1.12 in activity level 1, p=0.78; 0.94 in activity level 2, p=0.88; 0.38 in activity level 3, p=0.12                                                                                                                                                                    |
| Esteban, C. 2011, Respir Med <sup>S26</sup>     | Mortality                | Unadjusted coefficient 1.0540 for very low physical activity level, p=0.0021; 0.7228 for low physical activity level, p=0.0303; 0.6786 for medium physical activity level, p=0.0172                                                                                                  | ---                                                                                                                                                                                                                                                                                  |
| Garcia-Aymerich, J. 2006, Thorax <sup>S31</sup> | All-cause mortality      | Adjusted HR (95% CI): 0.76 (0.65 to 0.90) in low/moderate/high physical activity; p=0.001<br>Adjusted HR (95% CI): 1.04 (0.84 to 1.27) in low physical activity; 0.73 (0.61 to 0.86) in moderate physical activity; 0.72 (0.59 to 0.86) in high physical activity; p for trend<0.001 | ---                                                                                                                                                                                                                                                                                  |
|                                                 | Respiratory mortality    | ---                                                                                                                                                                                                                                                                                  | Adjusted HR (95% CI): 0.70 (0.48 to 1.02) in low/moderate/high physical activity; p=0.060<br>Adjusted HR (95% CI): 0.89 (0.55 to 1.44) in low physical activity; 0.64 (0.43 to 0.95) in moderate physical activity; 0.72 (0.46 to 1.12) in high physical activity; p for trend=0.072 |
|                                                 | Cardiovascular mortality | ---                                                                                                                                                                                                                                                                                  | Adjusted HR (95% CI): 0.77 (0.58 to 1.02) in                                                                                                                                                                                                                                         |

|                                                        |                                        |                                                                                                                                                                                                                                                                                           |                                                                                                                                                                                                                                         |
|--------------------------------------------------------|----------------------------------------|-------------------------------------------------------------------------------------------------------------------------------------------------------------------------------------------------------------------------------------------------------------------------------------------|-----------------------------------------------------------------------------------------------------------------------------------------------------------------------------------------------------------------------------------------|
|                                                        |                                        |                                                                                                                                                                                                                                                                                           | low/moderate/high physical activity; p=0.065<br>Adjusted HR (95% CI): 0.84 (0.58 to 1.23) in low physical activity; 0.73 (0.54 to 0.98) in moderate physical activity; 0.81 (0.59 to 1.11) in high physical activity; p for trend=0.195 |
| Garcia-Aymerich, J. 2008, Ann Epidemiol <sup>S32</sup> | All-cause mortality                    | Adjusted HR (95% CI): 0.83 (0.74 to 0.94) in moderate physical activity; 0.80(0.69 to 0.91) in high physical activity; p for trend=0.002<br><br>Weighted HR (95% CI): 0.88 (0.76 to 1.01) in moderate physical activity; 0.81 (0.69 to 0.95) in high physical activity; p for trend=0.009 | ---                                                                                                                                                                                                                                     |
| Garcia-Rio, F. 2012, Chest <sup>S35</sup>              | All-cause mortality                    | Adjusted HR (95% CI) 0.986 (0.981 to 0.992) for every 10 VMUs increased; p=0.002                                                                                                                                                                                                          | ---                                                                                                                                                                                                                                     |
| Palop Cervera, M. 2010, Rev Clin Esp <sup>S55</sup>    | Death after ECOPD hospital readmission | N (%) 30 (68) of dead vs. 22 (27) of alive in none outside activity group; 14 (32) of dead vs. 38 (47) of alive in 1-6h outside activity group; 0 (0) of dead vs. 21 (25) of alive in >6h outside activity group; p<0.01                                                                  | ---                                                                                                                                                                                                                                     |
|                                                        | Mortality                              | Adjusted OR (95% CI): 2.97 (1.2 to 7.3) in low or lack of physical activity; p<0.05                                                                                                                                                                                                       | ---                                                                                                                                                                                                                                     |
| Waschki, B. 2011, Chest <sup>S80</sup>                 | All-cause mortality                    | Adjusted HR (95 %CI): 0.009 (0.001 to 0.085) in physical activity level; p<0.001                                                                                                                                                                                                          | ---                                                                                                                                                                                                                                     |

# Outcome: QoL / HRQoL

| Paper                                         | Variable                 | Association                                                                                                                                                                                                                                                                    |                                                                                                                                                                                        |
|-----------------------------------------------|--------------------------|--------------------------------------------------------------------------------------------------------------------------------------------------------------------------------------------------------------------------------------------------------------------------------|----------------------------------------------------------------------------------------------------------------------------------------------------------------------------------------|
|                                               |                          | Significant                                                                                                                                                                                                                                                                    | Non-significant                                                                                                                                                                        |
| Esteban, C. 2006, QJM <sup>S24</sup>          | SF-36 physical component | Mean (SD) 35.6 (7.0) in activity level 0; 42.8 (8.0) in activity level 1; 45.3 (7.3) in activity level 2; 47.8 (8.3) in activity level 3; p<0.0001<br><br>Adjusted HR: 2.86 in activity level 1; p=0.024; 3.99 in activity level 2; p=0.001; 3.60 in activity level 3; p=0.010 | ---                                                                                                                                                                                    |
|                                               | SGRQ total               | Mean (SD) 57.5 (20.3) in activity level 0; 46.1 (18.5) in activity level 1; 39.5 (16.1) in activity level 2; 31.3 (17.2) in activity level 3; p<0.0001                                                                                                                         | Adjusted HR: -1.22 in activity level 1; p=0.65; -4.04 in activity level 2; p=0.11; -5.27 in activity level 3; p=0.07                                                                   |
|                                               | CRQ total                | Mean (SD) 82.6 (24.6) in activity level 0; 93.3 (26.2) in activity level 1; 99.9 (22.1) in activity level 2; 106.6 (25.2) in activity level 3; p<0.0001                                                                                                                        | Adjusted HR: 0.43 in activity level 1; p=0.91; 2.70 in activity level 2; p=0.47; 2.35 in activity level 3; p=0.59                                                                      |
| Esteban, C. 2010, Eur Respir J <sup>S25</sup> | SGRQ total               | Adjusted regression coefficient for each PA category (change baseline/5years), using low/low as reference category:<br>- low/moderate-high: 15.9, p=0.0005<br>- moderate/moderate: 10.2, p=0.007<br>- moderate/high: 18.4, p<0.0001<br>- high/high: 16.9, p<0.0001             | Adjusted regression coefficient for each PA category (change baseline/5years), using low/low as reference category:<br>- moderate/low: -0.7, p=0.87<br>- high/moderate-low: 8, p=0.05  |
|                                               | CRQ total                | Adjusted regression coefficient for each PA category (change baseline/5years), using low/low as reference category:<br>- moderate/moderate: 10.3, p=0.005<br>- moderate/high: 14.8, p<0.0004                                                                                   | Adjusted regression coefficient for each PA category (change baseline/5years), using low/low as reference category:<br>- low/moderate-high: 8.7, p=0.05<br>- moderate/low: 2.6, p=0.56 |

|                                                      |                          |                                                                                                  |     |
|------------------------------------------------------|--------------------------|--------------------------------------------------------------------------------------------------|-----|
|                                                      |                          | - high/moderate-low: 10.7, $p<0.005$<br>- high/high: 13.6, $p<0.0003$                            |     |
| Jehn, M. 2012, Med Sci Sports Exerc <sup>S40</sup>   | SF-36 physical component | Adjusted regression coefficient (95% CI): 0.30 (0.06 to 0.57) for fast walk (min/d); $p=0.015$   | --- |
|                                                      | SF-36 mental component   | Adjusted regression coefficient (95% CI): 0.23 (-0.03 to 0.49) for fast walk (min/d); $p=0.08$   | --- |
|                                                      | SGRQ symptoms            | Adjusted regression coefficient (95% CI): 0.76 (-0.13 to 0.28) for fast walk (min/d); $p=0.08$   | --- |
|                                                      | SGRQ activity            | Adjusted regression coefficient (95% CI): -0.07 (-0.25 to 0.12) for fast walk (min/d); $p=0.04$  | --- |
|                                                      | SGRQ impact              | Adjusted regression coefficient (95% CI): -0.16 (-0.34 to 0.15) for fast walk (min/d); $p=0.042$ | --- |
|                                                      | SGRQ total               | Adjusted regression coefficient (95% CI): -0.08 (-0.26 to 0.10) for fast walk (min/d); $p=0.045$ | --- |
| Lemmens, KM. 2008, Patient Educ Couns <sup>S44</sup> | CRQ dyspnea              | Adjusted regression coefficient: 0.38 for physical activity; $p<0.01$                            | --- |
|                                                      | CRQ emotional            | Adjusted regression coefficient: 0.17 for physical activity; $p<0.05$                            | --- |
|                                                      | CRQ fatigue              | Adjusted regression coefficient: 0.43 for physical activity; $p<0.01$                            | --- |
|                                                      | CRQ mastery              | Adjusted regression coefficient: 0.19 for physical activity; $p<0.01$                            | --- |
|                                                      | CCQ symptoms             | Adjusted regression coefficient: 0.31 for physical activity; $p<0.01$                            | --- |

|  |                      |                                                                       |     |
|--|----------------------|-----------------------------------------------------------------------|-----|
|  | CCQ mental state     | Adjusted regression coefficient: 0.25 for physical activity; $p<0.01$ | --- |
|  | CCQ functional state | Adjusted regression coefficient: 0.44 for physical activity; $p<0.01$ | --- |
|  | Health status        | Adjusted regression coefficient: 0.43 for physical activity; $p<0.01$ | --- |

Online supplement Table 4b. Other potential outcomes (only evidence in 1 study) and their association with physical activity, grouped in main categories and sorted by alphabetical order.

**Outcome: Bronchial colonization**

| Paper                                          | Variable               | Association                                                                                                                                    |                 |
|------------------------------------------------|------------------------|------------------------------------------------------------------------------------------------------------------------------------------------|-----------------|
|                                                |                        | Significant                                                                                                                                    | Non-significant |
| Garcia-Aymerich, J. 2009, Chest <sup>S33</sup> | Bronchial colonization | N (%) 24 (43) in quartile 1 (Q1) of energy expenditure in physical activity; 19 (33) in Q2; 20 (35) in Q3; 12 (22) in Q4; p for trend = 0.035. | ---             |

**Outcome: Depression**

| Paper                                     | Variable                | Association |                                                            |
|-------------------------------------------|-------------------------|-------------|------------------------------------------------------------|
|                                           |                         | Significant | Non-significant                                            |
| Lee, H. 2011, Geriatr Nurs <sup>S43</sup> | Depression (CES-D ≥ 16) | ---         | Correlation coefficient: 0.15 with physical activity; p=ns |

**Outcome: Gas exchange**

| Paper                     | Variable                  | Association                                                                                     |                 |
|---------------------------|---------------------------|-------------------------------------------------------------------------------------------------|-----------------|
|                           |                           | Significant                                                                                     | Non-significant |
| Garcia-Aymerich, J. 2009, | D <sub>LCO</sub> (% pred) | Mean (SD) 58 (20) in quartile 1 (Q1) of energy expenditure in physical activity; 66 (21) in Q2; | ---             |



|                      |                         |                                                                                                                                                                                                                                             |                                                                                                                                                                |
|----------------------|-------------------------|---------------------------------------------------------------------------------------------------------------------------------------------------------------------------------------------------------------------------------------------|----------------------------------------------------------------------------------------------------------------------------------------------------------------|
| Chest <sup>S33</sup> |                         | 68 (20) in Q3; 68 (22) in Q4; p for trend=0.004<br>Adjusted regression coefficient (95% CI): 5.8 (-0.26 to 11.9) for Q2 of energy expenditure in physical activity; 5.9 (-0.31 to 12.2) for Q3; 8.7 (2.4 to 14.9) for Q4; p for trend=0.012 |                                                                                                                                                                |
|                      | PO <sub>2</sub> (mmHg)  | ---                                                                                                                                                                                                                                         | Mean (SD) 74.5 (11.7) in quartile 1 (Q1) of energy expenditure in physical activity; 75.4 (11.1) in Q2; 75.0 (9.9) in Q3; 72.3 (10.7) in Q4; p for trend=0.187 |
|                      | PCO <sub>2</sub> (mmHg) | ---                                                                                                                                                                                                                                         | Mean (SD) 41.7 (5.6) in quartile 1 (Q1) of energy expenditure in physical activity; 41.4 (5.2) in Q2; 42.0 (4.7) in Q3; 42.1 (5.8) in Q4; p for trend=0.530    |

### **Outcome: Muscle strength**

| Paper                                          | Variable       | Association                                                                                                                                     |                                                                                                                                                                                         |
|------------------------------------------------|----------------|-------------------------------------------------------------------------------------------------------------------------------------------------|-----------------------------------------------------------------------------------------------------------------------------------------------------------------------------------------|
|                                                |                | Significant                                                                                                                                     | Non-significant                                                                                                                                                                         |
| Garcia-Aymerich, J. 2009, Chest <sup>S33</sup> | PEmax (% pred) | Mean (SD) 60 (21) in quartile 1 (Q1) of energy expenditure in physical activity; 68 (25) in Q2; 67 (22) in Q3; 71 (23) in Q4; p for trend=0.004 | Adjusted regression coefficient (95% CI): 7.4 (-0.44 to 15.2) for Q2 of energy expenditure in physical activity; 4.5 (-3.4 to 12.4) for Q3; 8.5 (0.6 to 16.4) for Q4; p for trend=0.081 |
|                                                | Plmax (% pred) | ---                                                                                                                                             | Mean (SD) 61 (28) in quartile 1 (Q1) of energy expenditure in physical activity; 62 (17) in Q2; 68 (23) in Q3; 65 (23) in Q4; p for trend=0.169                                         |

|  |                                |     |                                                                                                                                                     |
|--|--------------------------------|-----|-----------------------------------------------------------------------------------------------------------------------------------------------------|
|  | Non-dominant handgrip (% pred) | --- | Mean (SD) 104 (29) in quartile 1 (Q1) of energy expenditure in physical activity; 105 (22) in Q2; 105 (29) in Q3; 102 (28) in Q4; p for trend=0.593 |
|--|--------------------------------|-----|-----------------------------------------------------------------------------------------------------------------------------------------------------|

### **Outcome: Nutritional status**

| Paper                                          | Variable                  | Association                                                                                                                                                 |                                                                                                                                                             |
|------------------------------------------------|---------------------------|-------------------------------------------------------------------------------------------------------------------------------------------------------------|-------------------------------------------------------------------------------------------------------------------------------------------------------------|
|                                                |                           | Significant                                                                                                                                                 | Non-significant                                                                                                                                             |
| Garcia-Aymerich, J. 2009, Chest <sup>S33</sup> | BMI (kg/m <sup>2</sup> )  | Mean (SD) 27.5 (4.6) in quartile 1 (Q1) of energy expenditure in physical activity; 27.7 (4.4) in Q2; 28.6 (4.3) in Q3; 28.9 (5.3) in Q4; p for trend=0.023 | ---                                                                                                                                                         |
|                                                | FFMI (kg/m <sup>2</sup> ) | ---                                                                                                                                                         | Mean (SD) 19.8 (3.4) in quartile 1 (Q1) of energy expenditure in physical activity; 19.2 (2.9) in Q2; 19.5 (2.7) in Q3; 20.0 (3.2) in Q4; p for trend=0.524 |

### **Outcome: Other lung function parameters (not FEV<sub>1</sub>)**

| Paper                                          | Variable                          | Association                                                                                                                                     |                 |
|------------------------------------------------|-----------------------------------|-------------------------------------------------------------------------------------------------------------------------------------------------|-----------------|
|                                                |                                   | Significant                                                                                                                                     | Non-significant |
| Garcia-Aymerich, J. 2009, Chest <sup>S33</sup> | post-BD FEV <sub>1</sub> /FVC (%) | Mean (SD) 51 (13) in quartile 1 (Q1) of energy expenditure in physical activity; 51 (12) in Q2; 56 (11) in Q3; 55 (11) in Q4; p for trend=0.002 | ---             |

|  |            |                                                                                                                                                                 |     |
|--|------------|-----------------------------------------------------------------------------------------------------------------------------------------------------------------|-----|
|  | IC/TLC (%) | Mean (SD) 0.30 (0.09) in quartile 1 (Q1) of energy expenditure in physical activity; 0.29 (0.09) in Q2; 0.33 (0.11) in Q3; 0.32 (0.09) in Q4; p for trend=0.033 | --- |
|  | RV/TLC (%) | Mean (SD): 58 (9) in quartile 1 (Q1) of energy expenditure in physical activity; 57 (10) in Q2; 54 (10) in Q3; 54 (10) in Q4; p for trend=0.004                 | --- |

### **Outcome: Relapse**

| Paper                                           | Variable                                   | Association                                                                                                                  |                 |
|-------------------------------------------------|--------------------------------------------|------------------------------------------------------------------------------------------------------------------------------|-----------------|
|                                                 |                                            | Significant                                                                                                                  | Non-significant |
| Miravittles, M. 2011, Respir Med <sup>S47</sup> | Clinical failure on exacerbation (relapse) | Mean (SD) walking time per day (min) at baseline: 67 (45) in clinical success group vs. 48 (52) in clinical failure; p<0.001 | ---             |

### **Outcome: Self-efficacy**

| Paper                                          | Variable      | Association                                                                     |                 |
|------------------------------------------------|---------------|---------------------------------------------------------------------------------|-----------------|
|                                                |               | Significant                                                                     | Non-significant |
| Inal-Ince, D. 2005, Saudi Med J <sup>S39</sup> | Self-efficacy | Adjusted regression coefficient: 0.623 for activities of daily living; p<0.0001 | ---             |

**Outcome: Systemic inflammation**

| Paper                                          | Variable                         | Association                                                                                                                                                                                                                                                                                                   |                 |
|------------------------------------------------|----------------------------------|---------------------------------------------------------------------------------------------------------------------------------------------------------------------------------------------------------------------------------------------------------------------------------------------------------------|-----------------|
|                                                |                                  | Significant                                                                                                                                                                                                                                                                                                   | Non-significant |
| Garcia-Aymerich, J. 2009, Chest <sup>S33</sup> | TNF- $\alpha$ $\geq$ 0.5 (pg/mL) | N (%) 38 (48) in quartile 1 (Q1) of energy expenditure in physical activity; 32 (38) in Q2; 29 (35) in Q3; 18 (21) in Q4; p for trend<0.001<br><br>Adjusted OR (95% CI): 0.8 (0.4 to 1.6) in Q2 of energy expenditure in physical activity; 0.6 (0.3 to 1.3) in Q3; 0.4 (0.2 to 0.8) in Q4; p for trend=0.011 | ---             |
|                                                | CRP $\geq$ 3 (mg/L)              | N (%) 53 (68) in quartile 1 (Q1) of energy expenditure in physical activity; 51 (60) in Q2; 40 (50) in Q3; 43 (52) in Q4; p for trend=0.023<br><br>Adjusted OR (95% CI): 0.7 (0.4 to 1.3) in Q2 of energy expenditure in physical activity; 0.5 (0.3 to 0.9) in Q3; 0.5 (0.3 to 1.0) in Q4; p for trend=0.036 | ---             |

## Online supplement references

- S1 Altenburg WA, Bossenbroek L, de Greef MH, et al. Functional and psychological variables both affect daily physical activity in COPD: A structural equations model. *Respir Med* 2013;**107**:1740-1747.
- S2 Beauchamp MK, Sibley KM, Lakhani B, et al. Impairments in systems underlying control of balance in COPD. *Chest* 2012;**141**:1496-1503.
- S3 Behnke M, Wewel AR, Kirsten D, et al. Exercise training raises daily activity stronger than predicted from exercise capacity in patients with COPD. *Respir Med* 2005;**99**:711-717.
- S4 Bendstrup KE, Ingemann Jensen J, Holm S, et al. Out-patient rehabilitation improves activities of daily living, quality of life and exercise tolerance in chronic obstructive pulmonary disease. *Eur Respir J* 1997;**10**:2801-2806.
- S5 Benzo RP, Chang CC, Farrell MH, et al. Physical activity, health status and risk of hospitalization in patients with severe chronic obstructive pulmonary disease. *Respiration* 2010;**80**:10-18.
- S6 Berry MJ, Adair NE, Rejeski WJ Use of peak oxygen consumption in predicting physical function and quality of life in COPD patients. *Chest* 2006;**129**:1516-1522.
- S7 Berry MJ, Rejeski WJ, Miller ME, et al. A lifestyle activity intervention in patients with chronic obstructive pulmonary disease. *Respir Med* 2010;**104**:829-839.
- S8 Bestall JC, Paul EA, Garrod R, et al. Usefulness of the Medical Research Council (MRC) dyspnoea scale as a measure of disability in patients with chronic obstructive pulmonary disease. *Thorax* 1999;**54**:581-586.

- S9 Bon J, Fuhrman CR, Weissfeld JL, et al. Radiographic emphysema predicts low bone mineral density in a tobacco-exposed cohort. *Am J Respir Crit Care Med* 2011;**183**:885-890.
- S10 Bossenbroek L, ten Hacken NHT, van der Bij W, et al. Cross-sectional assessment of daily physical activity in chronic obstructive pulmonary disease lung transplant patients. *J Heart Lung Transplant* 2009;**28**:149-155.
- S11 Bourbeau J, Ford G, Zackon H, et al. Impact on patients' health status following early identification of a COPD exacerbation. *Eur Respir J* 2007;**30**:907-913.
- S12 Breyer MK, Breyer-Kohansal R, Funk GC, et al. Nordic walking improves daily physical activities in COPD: a randomised controlled trial. *Respir Res* 2010;**11**:112-
- S13 Chao PW, Ramsdell J, Renvall M, et al. Does a history of exercise in COPD patients affect functional status? A study using a lifetime physical activity questionnaire investigates a correlation between exercise and functional status as evidenced by six-minute walk distance. *COPD* 2011;**8**:429-436.
- S14 Chen YJ and Narsavage GL Factors related to chronic obstructive pulmonary disease readmission in Taiwan. *Western J Nurs Research* 2006;**28**:105-124.
- S15 Coronado M, Janssens JP, de Muralt B, et al. Walking activity measured by accelerometry during respiratory rehabilitation. *J Cardiopulm Rehabil* 2003;**23**:357-364.
- S16 Dal Negro RW, Aquilani R, Bertacco S, et al. Comprehensive effects of supplemented essential amino acids in patients with severe COPD and sarcopenia. *Monaldi Arch Chest Dis* 2010;**73**:25-33.

- S17 Dallas MI, McCusker C, Haggerty MC, et al. Using pedometers to monitor walking activity in outcome assessment for pulmonary rehabilitation. *Chron Respir Dis* 2009;**6**:217-224.
- S18 Daly C, Coughlan GF, Hennessy E, et al. Effects of neuromuscular electrical stimulation on the activity levels and exercise capacity of patients with moderate to severe COPD. *Physio Ireland* 2011;**32**:6-11.
- S19 de Blok BMJ, de Greef MHG, ten Hacken NHT, et al. The effects of a lifestyle physical activity counseling program with feedback of a pedometer during pulmonary rehabilitation in patients with COPD: a pilot study. *Patient Educ Couns* 2006;**61**:48-55.
- S20 Effing T, Zielhuis G, Kerstjens H, et al. Community based physiotherapeutic exercise in COPD self-management: a randomised controlled trial. *Respir Med* 2011;**105**:418-426.
- S21 Egan C, Deering BM, Blake C, et al. Short term and long term effects of pulmonary rehabilitation on physical activity in COPD. *Respir Med* 2012;**106**:1671-1679.
- S22 Eisner MD, Iribarren C, Yelin EH, et al. Pulmonary function and the risk of functional limitation in chronic obstructive pulmonary disease. *Am J Epidemiol* 2008;**167**:1090-1101.
- S23 Eliason G, Zakrisson AB, Piehl-Aulin K, et al. Physical activity patterns in patients in different stages of chronic obstructive pulmonary disease. *COPD* 2011;**8**:369-374.
- S24 Esteban C, Quintana JM, Aburto M, et al. A simple score for assessing stable chronic obstructive pulmonary disease. *Q J Med* 2006;**99**:751-759.

- S25 Esteban C, Quintana JM, Aburto M, et al. Impact of changes in physical activity on health-related quality of life among patients with COPD. *Eur Respir J* 2010;**36**:292-300.
- S26 Esteban C, Quintana JM, Aburto M, et al. The health, activity, dyspnea, obstruction, age, and hospitalization: prognostic score for stable COPD patients. *Respir Med* 2011;**105**:1662-1670.
- S27 Faager G and Larsen FF Performance changes for patients with chronic obstructive pulmonary disease on long-term oxygen therapy after physiotherapy. *J Rehabil Med* 2004;**36**:153-158.
- S28 Faulkner J, Walshaw E, Campbell J, et al. The feasibility of recruiting patients with early COPD to a pilot trial assessing the effects of a physical activity intervention. *Prim Care Respir J* 2010;**19**:124-130.
- S29 Garcia-Aymerich J, Farrero E, Felez MA, et al. Risk factors of readmission to hospital for a COPD exacerbation: a prospective study. *Thorax* 2003;**58**:100-105.
- S30 Garcia-Aymerich J, Felez MA, Escarrabill J, et al. Physical activity and its determinants in severe chronic obstructive pulmonary disease. *Med Sci Sports Exerc* 2004;**36**:1667-1673.
- S31 Garcia-Aymerich J, Lange P, Benet M, et al. Regular physical activity reduces hospital admission and mortality in chronic obstructive pulmonary disease: a population based cohort study. *Thorax* 2006;**61**:772-778.
- S32 Garcia-Aymerich J, Lange P, Serra I, et al. Time-dependent confounding in the study of the effects of regular physical activity in chronic obstructive pulmonary disease: an application of the marginal structural model. *Ann Epidemiol* 2008;**18**:775-783.



- S33 Garcia-Aymerich J, Serra I, Gomez FP, et al. Physical activity and clinical and functional status in COPD. *Chest* 2009;**136**:62-70.
- S34 Garcia-Rio F, Lores V, Mediano O, et al. Daily physical activity in patients with chronic obstructive pulmonary disease is mainly associated with dynamic hyperinflation. *Am J Respir Crit Care Med* 2009;**180**:506-512.
- S35 Garcia-Rio F, Rojo B, Casitas R, et al. Prognostic value of the objective measurement of daily physical activity in patients with COPD. *Chest* 2012;**142**:338-346.
- S36 Goto Y, Kurosawa H, Mori N, et al. Improved activities of daily living, psychological state and health-related quality of life for 12 months following lung volume reduction surgery in patients with severe emphysema. *Respirology* 2004;**9**:337-344.
- S37 Hartman JE, Boezen HM, de Greef MH, et al. Physical and psychosocial factors associated with physical activity in patients with chronic obstructive pulmonary disease. *Arch Phys Med Rehabil* 2013;**94**:2396-2402.
- S38 Hataji O, Naito M, Ito K, et al. Indacaterol improves daily physical activity in patients with chronic obstructive pulmonary disease. *Int J Chron Obstruct Pulmon Dis* 2013;**8**:1-5.
- S39 Inal-Ince D, Savci S, Coplu L, et al. Factors determining self-efficacy in chronic obstructive pulmonary disease. *Saudi Med J* 2005;**26**:542-547.
- S40 Jehn M, Schindler C, Meyer A, et al. Daily Walking Intensity as a Predictor of Quality of Life in Patients with Chronic Obstructive Pulmonary Disease. *Med Sci Sports Exerc* 2012;**44**:1212-1218.

- S41 Katajisto M, Kupiainen H, Rantanen P, et al. Physical inactivity in COPD and increased patient perception of dyspnea. *Int J Chron Obstruct Pulmon Dis* 2012;**7**:743-755.
- S42 Lahaije AJ, van Helvoort HA, Dekhuijzen PN, et al. Resting and ADL-induced dynamic hyperinflation explain physical inactivity in COPD better than FEV1. *Respir Med* 2013;**107**:834-840.
- S43 Lee H, Kim I, Lim Y, et al. Depression and sleep disturbance in patients with chronic obstructive pulmonary disease. *Geriatr Nurs* 2011;**32**:408-417.
- S44 Lemmens KMM, Nieboer AP, Huijsman R Designing patient-related interventions in COPD care: empirical test of a theoretical model. *Patient Educ Couns* 2008;**72**:223-231.
- S45 Lores V, Garcia-Rio F, Rojo B, et al. Recording the daily physical activity of COPD patients with an accelerometer: An analysis of agreement and repeatability. *Arch Bronconeumol* 2006;**42**:627-632.
- S46 Mador MJ, Patel AN, Nadler J Effects of pulmonary rehabilitation on activity levels in patients with chronic obstructive pulmonary disease. *J Cardiopulm Rehabil Prev* 2011;**31**:52-59.
- S47 Miravittles M, Izquierdo I, Herrejon A, et al. COPD severity score as a predictor of failure in exacerbations of COPD. The ESFERA study. *Respir Med* 2011;**105**:740-747.
- S48 Monteiro F, Camillo CA, Vitorasso R, et al. Obesity and physical activity in the daily life of patients with COPD. *Lung* 2012;**190**:403-410.

- S49 Moy ML, Mattheis K, Stolzmann K, et al. Free-living physical activity in COPD: assessment with accelerometer and activity checklist. *J Rehabil Res Dev* 2009;**46**:277-286.
- S50 Moy ML, Teylan M, Weston NA, et al. Daily step count predicts acute exacerbations in a US cohort with COPD. *PLoS One* 2013;**8**:e60400.
- S51 Nguyen HQ, Gill DP, Wolpin S, et al. Pilot study of a cell phone-based exercise persistence intervention post-rehabilitation for COPD. *Int J Chron Obstruct Pulmon Dis* 2009;**4**:301-313.
- S52 Nguyen HQ, Fan VS, Herting J, et al. Patients With COPD With Higher Levels of Anxiety Are More Physically Active. *Chest* 2013;**144**:145-151.
- S53 Nield M, Hoo GS, Roper J, et al. Usefulness of the human activity profile, a functional performance measure, in people with chronic obstructive pulmonary disease. *J Cardiopulm Rehabil* 2005;**25**:115-121.
- S54 Okubadejo AA, O'Shea L, Jones PW, et al. Home assessment of activities of daily living in patients with severe chronic obstructive pulmonary disease on long-term oxygen therapy. *Eur Respir J* 1997;**10**:1572-1575.
- S55 Palop Cervera M, Diego Damia A, Leon Fabregas M, et al. Precipitating factors of mortality in chronic obstructive pulmonary disease patients with frequent exacerbations. *Rev Clinica Esp* 2010;**210**:323-331.
- S56 Pitta F, Troosters T, Probst VS, et al. Physical activity and hospitalization for exacerbation of COPD. *Chest* 2006;**129**:536-544.
- S57 Pitta F, Troosters T, Probst VS, et al. Potential consequences for stable chronic obstructive pulmonary disease patients who do not get the recommended minimum daily amount of physical activity. *J Bras Pneumol* 2006;**32**:301-308.

- S58 Pitta F, Takaki MY, Oliveira NH, et al. Relationship between pulmonary function and physical activity in daily life in patients with COPD. *Respir Med* 2008;**102**:1203-1207.
- S59 Pitta F, Breyer MK, Hernandez NA, et al. Comparison of daily physical activity between COPD patients from Central Europe and South America. *Respir Med* 2009;**103**:421-426.
- S60 Pomidori L, Contoli M, Mandolesi G, et al. A simple method for home exercise training in patients with chronic obstructive pulmonary disease: one-year study. *J Cardiopulm Rehabil Prev* 2012;**32**:53-57.
- S61 Probst VS, Kovelis Dt, Hernandez NdA, et al. Effects of 2 Exercise Training Programs on Physical Activity in Daily Life in Patients With COPD. *Respir Care* 2011;**56**:1799-1807.
- S62 Roig M, Eng JJ, MacIntyre DL, et al. Falls in people with chronic obstructive pulmonary disease: an observational cohort study. *Respir Med* 2011;**105**:461-469.
- S63 Sandland CJ, Morgan MDL, Singh SJ Patterns of domestic activity and ambulatory oxygen usage in COPD. *Chest* 2008;**134**:753-760.
- S64 Schou L, Ostergaard B, Rydahl-Hansen S, et al. A randomised trial of telemedicine-based treatment versus conventional hospitalisation in patients with severe COPD and exacerbation - effect on self-reported outcome. *J Telemed Telecare* 2013; [*Epub ahead of print*]
- S65 Sewell L, Singh SJ, Williams JEA, et al. Can individualized rehabilitation improve functional independence in elderly patients with COPD? *Chest* 2005;**128**:1194-1200.

- S66 Sewell L, Singh SJ, Williams JE, et al. Seasonal variations affect physical activity and pulmonary rehabilitation outcomes. *J Cardiopulm Rehabil Prev* 2010;**30**:329-333.
- S67 Silva DR, Coelho AC, Dumke A, et al. Osteoporosis prevalence and associated factors in patients with COPD: a cross-sectional study. *Respir Care* 2011;**56**:961-968.
- S68 Skumlien S, Haave E, Morland L, et al. Gender differences in the performance of activities of daily living among patients with chronic obstructive pulmonary disease. *Chron Respir Dis* 2006;**3**:141-148.
- S69 Skumlien S, Aure Skogedal E, Skrede Ryg M, et al. Endurance or resistance training in primary care after in-patient rehabilitation for COPD? *Respir Med* 2008;**102**:422-429.
- S70 Takigawa N, Tada A, Soda R, et al. Comprehensive pulmonary rehabilitation according to severity of COPD. *Respir Med* 2007;**101**:326-332.
- S71 Troosters T, Sciurba F, Battaglia S, et al. Physical inactivity in patients with COPD, a controlled multi-center pilot-study. *Respir Med* 2010;**104**:1005-1011.
- S72 Tsara V, Serasli E, Katsarou Z, et al. Quality of life and social-economic characteristics of greek male patients on long-term oxygen therapy. *Respir Care* 2008;**53**:1048-1053.
- S73 van Gestel AJ, Kohler M, Steier J, et al. Cardiac autonomic function and cardiovascular response to exercise in patients with chronic obstructive pulmonary disease. *COPD* 2012;**9**:160-165.
- S74 Van Remoortel H, Hornikx M, Demeyer H, et al. Daily physical activity in subjects with newly diagnosed COPD. *Thorax* 2013;**68**:962-963.

- S75 Vergeret J, Brambilla C, Mounier L Portable oxygen therapy: use and benefit in hypoxaemic COPD patients on long-term oxygen therapy.[Erratum appears in Eur Respir J 1989 Mar;2(3):292]. Eur Respir J 1989;**2**:20-25.
- S76 Waatevik M, Johannessen A, Hardie JA, et al. Different COPD disease characteristics are related to different outcomes in the 6-minute walk test. COPD 2012;**9**:227-234.
- S77 Wakabayashi R, Motegi T, Yamada K, et al. Efficient integrated education for older patients with chronic obstructive pulmonary disease using the Lung Information Needs Questionnaire. Geriatr Gerontol Int 2011;**11**:422-430.
- S78 Wakabayashi R, Motegi T, Yamada K, et al. Presence of in-home caregiver and health outcomes of older adults with chronic obstructive pulmonary disease. J Am Geriatr Soc 2011;**59**:44-49.
- S79 Walker PP, Burnett A, Flavahan PW, et al. Lower limb activity and its determinants in COPD. Thorax 2008;**63**:683-689.
- S80 Waschki B, Kirsten A, Holz O, et al. Physical activity is the strongest predictor of all-cause mortality in patients with COPD: a prospective cohort study. Chest 2011;**140**:331-342.
- S81 Watz H, Waschki B, Boehme C, et al. Extrapulmonary effects of chronic obstructive pulmonary disease on physical activity: a cross-sectional study. Am J Respir Crit Care Med 2008;**177**:743-751.
- S82 Watz H, Waschki B, Kirsten A, et al. The metabolic syndrome in patients with chronic bronchitis and COPD: frequency and associated consequences for systemic inflammation and physical inactivity. Chest 2009;**136**:1039-1046.

- S83 Watz H, Waschki B, Meyer T, et al. Physical activity in patients with COPD. *Eur Respir J* 2009;**33**:262-272.
- S84 Weekes CE, Emery PW, Elia M Dietary counselling and food fortification in stable COPD: a randomised trial. *Thorax* 2009;**64**:326-331.
- S85 Wewel AR, Gellermann I, Schwertfeger I, et al. Intervention by phone calls raises domiciliary activity and exercise capacity in patients with severe COPD. *Respir Med* 2008;**102**:20-26.
- S86 Yeo J, Karimova G, Bansal S Co-morbidity in older patients with COPD--its impact on health service utilisation and quality of life, a community study. *Age Ageing* 2006;**35**:33-37.
- S87 Caspersen CJ, Powell KE, Christenson GM Physical activity, exercise, and physical fitness: definitions and distinctions for health-related research. *Public Health Rep* 1985;**100**:126-131.
- S88 Guyatt GH, Oxman AD, Schunemann HJ, et al. GRADE guidelines: a new series of articles in the Journal of Clinical Epidemiology. *J Clin Epidemiol* 2011;**64**:380-382.
- S89 Schunemann H, Hill S, Guyatt G, et al. The GRADE approach and Bradford Hill's criteria for causation. *J Epidemiol Community Health* 2011;**65**:392-395.
